# Supplementary material
Source: PubMed Central journal article supplement (PMC2734907)

# Supporting information

## Design, Synthesis and Biological Evaluation of New Generation Taxoids

Iwao Ojima\*,<sup>†,‡</sup> Jin Chen,<sup>†</sup> Liang Sun,<sup>†</sup> Christopher P. Borella,<sup>†</sup> Tao Wang,<sup>†</sup> Michael L. Miller,<sup>†</sup> Songnian Lin,<sup>†</sup> Xudong Geng,<sup>†</sup> Larisa Kuznetsova,<sup>†</sup> Chuanxing Qu,<sup>†</sup> David Gallager,<sup>†</sup> Xianrui Zhao,<sup>†</sup> Ilaria Zanardi,<sup>‡</sup> Shujun Xia,<sup>§</sup> Susan B. Horwitz,<sup>§</sup> Jon Mallen-St. Clair,<sup>¶</sup> Jennifer L. Guerriero,<sup>¶</sup> Dafna Bar-Sagi,<sup>¶</sup> Jean M. Veith,<sup>#</sup> Paula Pera,<sup>#</sup> and Ralph J. Bernacki<sup>#</sup>

<sup>†</sup> *Department of Chemistry, State University of New York at Stony Brook, Stony Brook, NY 11794-3400*

<sup>‡</sup> *Institute of Chemical Biology & Drug Discovery, State University of New York at Stony Brook, Stony Brook, NY 11794-3400*

<sup>§</sup> *Department of Molecular Pharmacology, Albert Einstein College of Medicine, Bronx, New York 10461; ¶ Department of Molecular Genetics and Microbiology, State University of New York at Stony Brook, Stony Brook, NY 11794-5222*

<sup>#</sup> *Department of Experimental Therapeutics, Roswell Park Cancer Institute, Elm and Carlton Streets, Buffalo, NY 14263*

---

To whom correspondence should be addressed:  
Email: [iojima@notes.cc.sunysb.edu](mailto:iojima@notes.cc.sunysb.edu)  
Phone: 631-632-1339. Fax: 631-632-7942

## Table of contents

|                                                                          | Page numbers |
|--------------------------------------------------------------------------|--------------|
| Characterization data for <b>9a</b> , <b>9b</b> and <b>9d-f</b>          | S4-5         |
| Characterization data for <b>11a</b> , <b>11b</b> and <b>11d-k(l?)</b> : | S5-7         |
| Characterization data ( <sup>1</sup> H NMR) for <b>16a-g</b>             | S8           |
| Structure and NMR spectra for <b>6a</b>                                  | S9-S10       |
| Structure and NMR spectra for <b>6b</b>                                  | S11-S12      |
| Structure and NMR spectra for <b>6c</b>                                  | S13-S14      |
| Structure and NMR spectra for <b>6d</b>                                  | S15          |
| Structure and NMR spectra for <b>6e</b>                                  | S16-S17      |
| Structure and NMR spectra for <b>6f</b>                                  | S18-S19      |
| Structure and NMR spectra for <b>6g</b>                                  | S20-S21      |
| Structure and NMR spectra for <b>6h</b>                                  | S222-S23     |
| Structure and NMR spectra for <b>6i</b>                                  | S24          |
| Structure and NMR spectra for <b>6j</b>                                  | S25          |
| Structure and NMR spectra for <b>6m</b>                                  | S26-S27      |
| Structure and NMR spectra for <b>6n</b>                                  | S28-S29      |
| Structure and NMR spectra for <b>6o</b>                                  | S30-S31      |
| Structure and NMR spectra for <b>14a</b>                                 | S32-S33      |
| Structure and NMR spectra for <b>14c</b>                                 | S34-S36      |
| Structure and NMR spectra for <b>14d</b>                                 | S37-S38      |
| Structure and NMR spectra for <b>14e</b>                                 | S39          |
| Structure and NMR spectra for <b>14f</b>                                 | S40          |
| Structure and NMR spectra for <b>14g</b>                                 | S41          |
| Structure and NMR spectra for <b>14h</b>                                 | S42-S43      |
| Structure and NMR spectra for <b>14i</b>                                 | S44-S45      |
| Structure and NMR spectra for <b>14j</b>                                 | S46          |
| Structure and NMR spectra for <b>14k</b>                                 | S47-S48      |
| Structure and NMR spectra for <b>14l</b>                                 | S49-S50      |
| Structure and NMR spectra for <b>14m</b>                                 | S51-S52      |
| Structure and NMR spectra for <b>14n</b>                                 | S53-S54      |
| Structure and NMR spectra for <b>14o</b>                                 | S55-S56      |

|                                          |         |
|------------------------------------------|---------|
| Structure and NMR spectra for <b>14p</b> | S57-S58 |
| Structure and NMR spectra for <b>15c</b> | S59-S61 |
| Structure and NMR spectra for <b>15d</b> | S62-S63 |
| Structure and NMR spectra for <b>15g</b> | S64     |
| Structure and NMR spectra for <b>17a</b> | S65-S66 |
| Structure and NMR spectra for <b>17b</b> | S67-S68 |
| Structure and NMR spectra for <b>17c</b> | S69-S70 |
| Structure and NMR spectra for <b>17d</b> | S71-S72 |
| Structure and NMR spectra for <b>17e</b> | S73-S74 |
| Structure and NMR spectra for <b>17f</b> | S75-S76 |
| Structure and NMR spectra for <b>17g</b> | S77-S78 |
| Structure and NMR spectra for <b>18b</b> | S79-S80 |
| Structure and NMR spectra for <b>18c</b> | S81     |
| Structure and NMR spectra for <b>18f</b> | S82-S83 |
| Structure and NMR spectra for <b>18g</b> | S84-S85 |
| Structure and NMR spectra for <b>18h</b> | S86-S87 |
| Structure and NMR spectra for <b>18k</b> | S88-S89 |
| Structure and NMR spectra for <b>18m</b> | S90-S91 |

## Characterization data for 9a, 9b and 9d-f:

### 7,10,13-Tris(triethylsilyl)-2-debenzoyl-2-(3-methylbenzoyl)-10-deacetyl baccatin III (9a).

White solid; 90%; mp 198-200 °C  $^1\text{H}$  (300 MHz,  $\text{CDCl}_3$ )  $\delta$  0.68 (m, 18 H), 0.93 (m, 27 H), 1.11 (s, 3 H), 1.18 (s, 3 H), 1.59 (bs, 1 H), 1.64 (s, 3 H), 1.88 (m, 1 H), 1.98 (s, 3 H), 2.14 (m, 2 H), 2.27 (s, 3 H), 2.40 (s, 3 H) 2.50 (m, 1 H), 3.83 (d,  $J = 7.2$  Hz, 1H), 4.12 (d,  $J = 8.4$  Hz, 1 H), 4.29 (d,  $J = 8.4$  Hz, 1 H), 4.40 (m, 1 H), 4.92 (m, 2 H), 5.19 (s, 1 H), 5.57 (d,  $J = 6.9$  Hz, 1 H), 7.35 (m, 2 H), 7.88 (m, 2 H);  $^{13}\text{C}$  NMR (75 MHz,  $\text{CDCl}_3$ )  $\delta$  5.34, 5.73, 6.45, 7.35, 7.38, 7.43, 10.9, 15.0, 21.1, 21.8, 22.8, 26.8, 37.8, 40.4, 43.5, 47.4, 58.7, 68.8, 73.2, 75.8, 77.9, 80.1, 81.3, 84.5, 127.7, 128.9, 130.1, 131.2, 134.6, 136.3, 138.7, 139.8, 167.7, 170.4, 206.1.

### 7,10,13-Tri(triethylsilyl)-2-debenzoyl-2-(3-methoxybenzoyl)-10-deacetyl baccatin III (9b).

White solid; 71%; mp 201-202 °C;  $[\alpha]_{\text{D}}^{20}$  -40 (c 0.32,  $\text{CHCl}_3$ );  $^1\text{H}$  NMR ( $\text{CDCl}_3$ )  $\delta$  0.60 (m, 18 H), 0.98 (m, 27 H), 1.11 (s, 3 H), 1.18 (s, 3 H), 1.57 (bs, 1 H), 1.62 (s, 3 H), 1.85 (m, 1 H), 1.96 (s, 3 H), 2.14 (m, 2 H), 2.26 (s, 3 H), 2.50 (m, 1 H), 3.83 (m, 4 H), 4.13 (d,  $J = 7.9$  Hz, 1 H), 4.30 (d,  $J = 8.1$  Hz, 1 H), 4.39 (dd,  $J = 10.4, 6.9$  Hz, 1 H), 4.92 (m, 2 H), 5.17 (s, 1 H), 5.59 (d,  $J = 6.9$  Hz, 1 H), 7.10 (m, 1 H), 7.35 (t,  $J = 7.9$  Hz, 1 H), 7.61 (s, 1 H), 7.66 (d,  $J = 7.7$  Hz, 2 H);  $^{13}\text{C}$  NMR ( $\text{CDCl}_3$ )  $\delta$  4.9, 5.2, 6.0, 6.9, 10.4, 14.6, 20.6, 22.4, 26.3, 37.3, 39.9, 43.0, 46.9, 55.3, 58.3, 68.3, 72.6, 75.5, 75.8, 76.6, 79.5, 80.9, 84.0, 114.3, 120.2, 122.5, 129.5, 130.9, 135.8, 139.4, 159.6, 167.0, 169.9, 205.7. HRMS:  $m/e$  calcd for  $\text{C}_{48}\text{H}_{80}\text{O}_{11}\text{Si}_3\cdot\text{H}^+$ : 917.5087. Found: 917.5084 ( $\Delta = 0.3$  ppm).

### 7,10,13-Tri(triethylsilyl)-2-debenzoyl-2-(3-chlorobenzoyl)-10-deacetyl baccatin III (9d).

White solid; 81%; mp 175-177 °C;  $[\alpha]_{\text{D}}^{20}$  -26 (c 0.27,  $\text{CHCl}_3$ );  $^1\text{H}$  NMR ( $\text{CDCl}_3$ )  $\delta$  0.60 (m, 18 H), 0.98 (m, 27 H), 1.09 (s, 3 H), 1.16 (s, 3 H), 1.50 (bs, 1 H), 1.64 (s, 3 H), 1.85 (m, 1 H), 1.97 (s, 3 H), 2.14 (m, 2 H), 2.26 (s, 3 H), 2.57 (m, 1 H), 3.83 (d,  $J = 7.0$  Hz, 1 H), 4.12 (d,  $J = 8.3$  Hz, 1 H), 4.24 (d,  $J = 8.2$  Hz, 1 H), 4.39 (dd,  $J = 10.3, 6.5$  Hz, 1 H), 4.92 (m, 2 H), 5.17 (s, 1 H), 5.55 (d,  $J = 7.1$  Hz, 1 H), 7.39 (m, 1 H), 7.43 (m, 1 H), 7.94 (d,  $J = 7.8$  Hz, 1 H), 8.09 (m, 1 H);  $^{13}\text{C}$  NMR ( $\text{CDCl}_3$ )  $\delta$  4.8, 5.2, 5.9, 6.9, 10.4, 14.6, 20.6, 22.3, 26.3, 37.2, 39.9, 42.9, 46.9, 58.2, 68.3, 72.7, 75.7, 76.0, 79.7, 80.7, 84.0, 87.6, 128.2, 128.6, 129.9, 130.2, 131.5, 133.4, 134.7, 135.7, 139.5, 165.7, 169.9, 205.5. HRMS:  $m/e$  calcd for  $\text{C}_{47}\text{H}_{77}\text{O}_{10}\text{ClSi}_3\cdot\text{H}^+$ : 921.4591. Found: 921.4588 ( $\Delta = 0.4$  ppm).

### 7,10,13-Tris(triethylsilyl)-2-debenzoyl-2-(3-azidobenzoyl)-10-deacetyl baccatin III (9e).

White solid; 85 %:  $^1\text{H}$  NMR ( $\text{CDCl}_3$ )  $\delta$  0.62 (m, 18 H), 1.01 (m, 27 H), 1.04 (s, 3 H), 1.20 (s, 3 H), 1.57 (bs, 1 H), 1.66 (s, 3 H), 1.88 (ddd,  $J = 2.1, 10.5$  Hz, 1 H), 2.00 (s, 3 H), 2.17 (m, 2 H), 2.31 (s, 3 H), 2.55 (ddd,  $J = 3.0, 6.6$  Hz, 1 H), 3.88 (d,  $J = 6.9$  Hz, 1 H), 4.15 (d,  $J = 8.1$  Hz, 1 H), 4.29 (d,  $J = 8.1$  Hz, 1 H), 4.43 (dd,  $J = 3.9, 10.8$  Hz, 1 H), 4.95 (m, 2 H), 5.21 (s, 1 H), 5.63 (d,  $J = 6.9$  Hz, 1 H), 7.22 (d,  $J = 8.1$  Hz, 1 H), 7.47 (t,  $J = 8.1$  Hz, 1 H), 7.79 (s, 1 H), 7.86 (d,  $J = 7.5$  Hz, 1 H);  $^{13}\text{C}$  NMR ( $\text{CDCl}_3$ )  $\delta$  5.1, 5.5, 6.2, 7.1, 7.2, 10.7, 14.9, 20.8, 22.7, 26.6, 37.5, 40.0, 43.2, 47.1, 58.5, 68.5, 72.9, 76.0, 76.2, 76.8, 79.8, 81.0, 84.3, 120.2, 124.5, 126.9, 130.3, 131.6, 135.9, 139.8, 140.9, 166.4, 170.3, 205.9.

**7,10,13-Tri(triethylsilyl)-2-debenzoyl-2-(3-ethenylbenzoyl)-10-deacetylbaecatin III (9f).**

White solid; 54%; <sup>1</sup>H NMR (250 MHz, CDCl<sub>3</sub>) δ 0.63 (m, 18 H), 0.97 (m, 27 H), 1.06 (s, 3 H), 1.10 (s, 3 H), 1.49 (bs, 1 H), 1.58 (s, 3 H), 1.86 (m, 1 H), 1.93 (s, 3 H), 2.00 (s, 1 H), 2.04 (s, 1 H), 2.16 (s, 3 H), 2.46 (m, 1 H), 3.84 (d, *J* = 7.0 Hz, 1 H), 4.14 (d, *J* = 7.8 Hz, 1 H), 4.28 (dd, *J* = 6.6, 10.4 Hz, 1 H), 4.40 (d, *J* = 7.9 Hz, 1 H), 4.91-4.95 (m, 2 H), 5.20 (s, 1 H), 5.30 (d, *J* = 16.0 Hz, 1 H), 5.60 (m, 1 H), 5.80 (d, *J* = 17.5 Hz, 1 H), 6.72 (m, 1 H), 7.40 (m, 1 H), 7.95 (d, 1 H), 8.15 (d, 1 H); <sup>13</sup>C NMR (62.9 MHz, CDCl<sub>3</sub>) δ 0.3, 0.7, 1.4, 2.3, 2.4, 5.9, 10.0, 16.1, 17.9, 21.8, 32.8, 38.5, 42.4, 53.7, 63.8, 68.1, 71.0, 72.1, 72.5, 72.9, 75.0, 76.3, 79.5, 110.6, 123.1, 124.2, 125.4, 126.7, 131.3, 131.5, 133.5, 134.9, 163.5, 165.3, 201.1.

**Characterization data for 11a, 11b and 11d-I:**

**2-Debenzoyl-2-(3-methylbenzoyl)-7-triethylsilylbaecatin III (11a).** White solid; 94%; mp 100-104 °C; <sup>1</sup>H (300 MHz, CDCl<sub>3</sub>) δ 0.55 (m, 6 H), 0.88 (m, 9 H), 1.08 (s, 6 H), 1.67 (m, 1 H), 1.76(s, 3 H), 1.90 (m, 1 H), 2.12 (s, 3 H), 2.15 (s, 3 H), 2.21 (m, 2 H), 2.24 (s, 3 H), 2.41 (s, 3 H) 2.54 (m, 1 H), 3.90 (d, *J* = 6.6 Hz, 1H), 4.12 (d, *J* = 8.4 Hz, 1 H), 4.26 (d, *J* = 8.4 Hz, 1 H), 4.40 (m, 1 H), 4.81 (t, *J* = 6.6 Hz, 1 H), 4.95 (d, *J* = 8.4 Hz, 1 H), 5.54 (d, *J* = 7.2 Hz, 1 H), 6.45 (s, 1 H), 7.35 (m, 2 H), 7.88 (m, 2 H); <sup>13</sup>C NMR (75 MHz, CDCl<sub>3</sub>) δ 5.18, 5.29, 6.70, 9.88, 15.1, 19.5, 20.1, 20.9, 21.3, 22.5, 26.8, 37.2, 38.6, 42.6, 47.0, 57.8, 67.8, 72.9, 74.6, 78.7, 80.7, 84.2, 127.2, 128.4, 129.3, 130.7, 134.3, 134.5, 138.3, 143.9, 167.3, 170.7, 205.1.

**2-Debenzoyl-2-(3-methoxybenzoyl)-7-triethylsilylbaecatin III (11b).** White solid; 77%, mp 100-104 °C; <sup>1</sup>H (300 MHz, CDCl<sub>3</sub>) δ 0.55 (m, 6 H), 0.88 (m, 9 H), 1.08 (s, 6 H), 1.67 (m, 1 H), 1.76(s, 3 H), 1.90 (m, 1 H), 2.12 (s, 3 H), 2.15 (s, 3 H), 2.21 (m, 2 H), 2.24 (s, 3 H), 2.41 (s, 3 H) 2.54 (m, 1 H), 3.90 (d, *J* = 6.6 Hz, 1H), 4.12 (d, *J* = 8.4 Hz, 1 H), 4.26 (d, *J* = 8.4 Hz, 1 H), 4.40 (m, 1 H), 4.81 (t, *J* = 6.6 Hz, 1 H), 4.95 (d, *J* = 8.4 Hz, 1 H), 5.54 (d, *J* = 7.2 Hz, 1 H), 6.45 (s, 1 H), 7.35 (m, 2 H), 7.88 (m, 2 H); <sup>13</sup>C NMR (75 MHz, CDCl<sub>3</sub>) δ 5.18, 5.29, 6.70, 9.88, 15.1, 19.5, 20.1, 20.9, 21.3, 22.5, 26.8, 37.2, 38.6, 42.6, 47.0, 57.8, 67.8, 72.9, 74.6, 78.7, 80.7, 84.2, 127.2, 128.4, 129.3, 130.7, 134.3, 134.5, 138.3, 143.9, 167.3, 170.7, 205.1.

**7-Triethylsilyl-2-debenzoyl-2-(3-chlorobenzoyl)-10-deacetyl-10-propanoylbaecatin III (11d).** White solid; 77%; mp 110-112 °C; [α]<sub>D</sub><sup>20</sup> -59 (c 0.22, CHCl<sub>3</sub>); <sup>1</sup>H NMR (CDCl<sub>3</sub>) δ 0.56 (q, *J* = 7.8 Hz, 6 H), 0.89 (t, *J* = 7.8 Hz, 9 H), 1.00 (s, 3 H), 1.20 (m, 7 H), 1.64 (s, 3 H), 1.83 (m, 1 H), 2.16 (s, 3 H), 2.25 (m, 3 H), 2.40 (m, 4 H), 3.85 (d, *J* = 6.8 Hz, 1 H), 4.09 (d, *J* = 8.2 Hz, 1 H), 4.25 (d, *J* = 8.2 Hz, 1 H), 4.45 (dd, *J* = 10.2, 6.7 Hz, 1 H), 4.79 (t, *J* = 7.5 Hz, 1 H), 4.94 (d, *J* = 8.9 Hz, 1 H), 5.55 (d, *J* = 7.1 Hz, 1 H), 6.45 (s, 1 H), 7.39 (t, *J* = 7.9 Hz, 1 H), 7.54 (d, *J* = 8.1 Hz, 1 H), 7.95 (d, *J* = 7.6 Hz, 1 H), 8.08 (s, 1 H); <sup>13</sup>C NMR (CDCl<sub>3</sub>) δ 5.3, 6.7, 9.2, 9.9, 14.9, 20.1, 22.5, 26.8, 27.7, 37.2, 38.3, 42.7, 47.2, 58.5, 67.8, 72.3, 75.2, 75.5, 76.4, 78.8, 80.7, 84.2, 128.2, 129.9, 130.2, 131.2, 132.5, 133.5, 134.7, 144.1, 165.6, 170.6, 172.7, 202.2. HRMS: *m/e* calcd for C<sub>38</sub>H<sub>53</sub>O<sub>11</sub>ClSi·H<sup>+</sup>: 749.3124. Found: 749.3127 (Δ = - 0.4 ppm).

**7-Triethylsilyl-2-debenzoyl-2-(3-azidobenzoyl)-10-deacetyl-10-propanoylbaccatin III (11e).**

White solid; 84%; mp 105-108 °C;  $[\alpha]_D^{20}$  -56 (c 0.090, CHCl<sub>3</sub>); <sup>1</sup>H NMR (CDCl<sub>3</sub>) δ 0.54 (q, J = 7.8 Hz, 6 H), 0.90 (t, J = 7.8 Hz, 9 H), 0.94 (s, 3 H), 1.20-1.22 (m, 9 H), 1.64 (s, 3 H), 1.83 (m, 1 H), 2.02 (s, 3 H), 2.18 (m, 3 H), 2.40 (m, 4 H), 3.87 (d, J = 6.9 Hz, 1 H), 4.09 (d, J = 8.2 Hz, 1 H), 4.25 (d, J = 8.2 Hz, 1 H), 4.47 (dd, J = 10.2, 6.7 Hz, 1 H), 4.79 (t, J = 7.5 Hz, 1 H), 4.92 (d, J = 8.7 Hz, 1 H), 5.60 (d, J = 7.0 Hz, 1 H), 6.45 (s, 1 H), 7.23 (m, 1 H), 7.44 (t, J = 7.9 Hz, 1 H), 7.78 (s, 1 H), 7.85 (d, J = 7.7 Hz, 1 H); <sup>13</sup>C NMR (CDCl<sub>3</sub>) δ 5.3, 6.7, 9.2, 9.9, 14.9, 20.1, 22.6, 26.7, 27.6, 37.2, 38.3, 42.7, 47.2, 58.5, 67.8, 72.3, 75.2, 75.5, 76.4, 78.7, 80.8, 84.2, 120.1, 124.2, 126.6, 130.1, 131.1, 132.6, 140.7, 144.0, 166.1, 170.7, 172.7, 202.2. HRMS: *m/e* calcd for C<sub>38</sub>H<sub>53</sub>N<sub>3</sub>O<sub>11</sub>Si·H<sup>+</sup>: 756.3528. Found: 756.3531 (Δ = - 0.4 ppm).

**2-Debenzoyl-2-(3-vinylbenzoyl)-7-triethylsilyl-10-deacetyl-10-propanoylbaccatin III (11f).**

White solid; 67%, mp 108-110 °C; <sup>1</sup>H (300 MHz, CDCl<sub>3</sub>) δ 0.58 (m, 6 H), 0.91 (m, 9 H), 1.03 (s, 3 H), 1.19 (s, 3 H), 1.20 (t, J = 7.5 Hz, 3 H), 1.67 (s, 3 H), 1.87 (m, 1 H), 2.20 (s, 3 H), 2.26 (m, 2 H), 2.28 (s, 3 H), 2.47 (m, 1 H), 3.89 (d, J = 7.1 Hz, 1 H), 4.14 (d, J = 8.0 Hz, 1 H), 4.31 (d, J = 8.2 Hz, 1 H), 4.49 (dd, J = 6.9, 10.4 Hz, 1 H), 4.83 (t, J = 8.2 Hz, 1 H), 4.96 (d, J = 8.2 Hz, 1 H), 5.35 (d, J = 11.0 Hz, 1 H), 5.63 (d, J = 6.9 Hz, 1 H), 5.84 (d, J = 17.6 Hz, 1 H), 6.47 (s, 1 H), 6.75 (dd, J = 11.0, 17.0 Hz, 1 H), 7.43 (t, J = 7.7 Hz, 1 H), 7.61 (d, J = 7.7 Hz, 1 H), 7.97 (d, J = 7.7 Hz, 1 H), 8.18 (s, 1 H); <sup>13</sup>C NMR (75.0 MHz, CDCl<sub>3</sub>) δ 5.3, 6.7, 9.2, 14.9, 19.5, 20.1, 22.7, 26.8, 27.7, 37.2, 38.2, 42.8, 47.3, 58.6, 68.0, 72.3, 74.8, 78.7, 80.9, 84.2, 115.3, 127.7, 128.8, 129.7, 131.3, 135.9, 138.0, 143.8, 167.0, 170.6, 172.7, 202.2.

**7-Triethylsilyl-2-debenzoyl-2-(3-methoxybenzoyl)-10-deacetyl-10-propanoylbaccatin III (11g).**

White solid; 95%; mp 105-107 °C;  $[\alpha]_D^{20}$  -85 (c 0.13, CHCl<sub>3</sub>); <sup>1</sup>H NMR (CDCl<sub>3</sub>) δ 0.56 (q, J = 7.8 Hz, 6 H), 0.85 (t, J = 7.8 Hz, 9 H), 0.99 (s, 3 H), 1.20 (m, 7 H), 1.64 (s, 3 H), 1.83 (m, 1 H), 2.00 (s, 3 H), 2.16 (s, 3 H), 2.23 (m, 3 H), 2.40 (m, 3 H), 3.85 (m, 4 H), 4.09 (m, 2 H), 4.29 (d, J = 8.3 Hz, 1 H), 4.45 (dd, J = 10.2, 6.7 Hz, 1 H), 4.79 (t, J = 7.9 Hz, 1 H), 4.94 (d, J = 8.9 Hz, 1 H), 5.57 (d, J = 6.9 Hz, 1 H), 6.45 (s, 1 H), 7.09 (dd, J = 8.3, 2.2 Hz, 1 H), 7.33 (t, J = 8.1 Hz, 1 H), 7.60 (s, 1 H), 7.66 (d, J = 7.7 Hz, 1 H); <sup>13</sup>C NMR (CDCl<sub>3</sub>) δ 5.3, 6.7, 9.2, 9.9, 14.2, 14.9, 20.1, 22.5, 26.8, 27.7, 37.2, 38.3, 42.7, 47.2, 55.3, 58.6, 60.4, 67.8, 72.3, 74.8, 75.6, 76.4, 78.7, 80.8, 84.2, 114.7, 119.9, 122.5, 129.6, 130.6, 132.6, 144.1, 159.6, 166.9, 170.6, 172.7, 202.4. HRMS: *m/e* calcd for C<sub>39</sub>H<sub>56</sub>O<sub>12</sub>Si·H<sup>+</sup>: 745.3619. Found: 745.3617 (Δ = 0.3 ppm).

**2-Debenzoyl-2-(3-methoxybenzoyl)-7-triethylsilyl-10-(cyclopropanecarbonyl)baccatin III (11h).**

White solid; 32 mg, 84%; mp 145-147 °C;  $[\alpha]_D^{25}$  -61 (c 0.77, CHCl<sub>3</sub>); <sup>1</sup>H NMR (300 MHz, CDCl<sub>3</sub>) δ 0.55 (m, 6H), 0.91 (m, 9H), 1.04 (s, 3H), 1.19 (s, 3H), 1.63 (m, 4H), 1.66 (s, 3H), 1.86 (m, 2H), 2.18 (s, 3H), 2.25 (s, 3H), 2.27 (m, 2H), 2.51 (m, 1H), 3.86 (s, 3H), 3.88 (d, J = 6.9 Hz, 1H), 4.13 (d, J = 7.8 Hz, 1H), 4.33 (d, J = 8.4 Hz, 1H), 4.47 (dd, J = 6.6, 10.2 Hz, 1H), 4.82 (t, J = 8.1 Hz, 1H), 4.95 (d, J = 8.4 Hz, 1 H), 5.61 (d, J = 6.9 Hz, 1H), 6.45 (s, 1H), 7.13 (dd, J = 2.4, 8.1 Hz, 1H), 7.37 (t, J = 7.8 Hz, 1H), 7.63 (s, 1H), 7.70 (d, J = 7.5 Hz, 1H); <sup>13</sup>C NMR (75.0 MHz, CDCl<sub>3</sub>) δ 5.3, 6.7, 8.5, 9.9, 13.0, 14.9, 20.1, 22.6, 26.8, 37.2, 38.3, 42.7, 47.2, 55.4, 58.6, 67.9, 72.3, 74.8, 75.5, 78.7, 80.9, 84.2, 114.7, 120.0, 122.5, 129.6, 130.6, 132.7, 143.9, 159.6, 166.9, 170.7, 173.1, 202.3.

**2-Debenzoyl-2-(3-methoxybenzoyl)-7-triethylsilyl-10-deacetyl-10-(methoxycarbonyl)-**

**baccatin III (11i):** White solid; 92%, mp 110 °C; <sup>1</sup>H (300 MHz, CDCl<sub>3</sub>) δ 0.55 (m, 6 H), 0.90 (m, 9 H), 1.08 (s, 3 H), 1.12 (s, 3 H), 1.62 (s, 3 H), 1.68 (m, 4 H), 1.90 (m, 1 H), 2.12 (s, 3 H), 2.21 (m, 2 H), 2.24 (s, 3 H), 2.59 (m, 1 H), 3.85 (m, 7 H), 4.07 (m, 2 H), 4.31 (d, *J* = 8.1 Hz, 1 H), 4.49 (dd, *J* = 10.2, 6.7 Hz, 1 H), 4.84 (m, 1 H), 4.94 (d, *J* = 8.1 Hz, 1 H), 5.60 (d, *J* = 6.9 Hz, 1 H), 6.28 (s, 1 H), 7.11 (dd, *J* = 8.3, 2.2 Hz, 1 H), 7.36 (t, *J* = 8.3 Hz, 1 H), 7.63 (s, 1 H), 7.68 (d, *J* = 7.5 Hz, 1 H); <sup>13</sup>C NMR (75 MHz, CDCl<sub>3</sub>) δ 5.3, 6.7, 9.9, 15.0, 19.5, 22.7, 26.7, 35.2, 37.1, 41.3, 47.2, 55.0, 55.4, 58.1, 67.9, 72.4, 74.7, 78.7, 79.2, 81.5, 84.2, 114.7, 120.0, 122.5, 129.6, 130.3, 134.5, 144.7, 154.6, 159.9, 168.5, 173.2, 204.3.

**2-Debenzoyl-2-(3-methoxybenzoyl)-7-triethylsilyl-10-deacetyl-10-(benzyloxycarbonyl)-**

**baccatin III (11j):** White solid; 94%, mp 112-120 °C; <sup>1</sup>H (300 MHz, CDCl<sub>3</sub>) δ 0.55 (m, 6 H), 0.90 (m, 9 H), 1.08 (s, 3 H), 1.12 (s, 3 H), 1.62 (s, 3 H), 1.68 (m, 4 H), 1.90 (m, 1 H), 2.12 (s, 3 H), 2.21 (m, 2 H), 2.24 (s, 3 H), 2.59 (m, 1 H), 3.85 (m, 6 H), 4.07 (m, 2 H), 4.31 (d, *J* = 8.1 Hz, 1 H), 4.49 (dd, *J* = 10.2, 6.7 Hz, 1 H), 4.84 (m, 1 H), 4.94 (d, *J* = 8.1 Hz, 1 H), 5.60 (d, *J* = 6.9 Hz, 1 H), 6.29 (s, 1 H), 7.11 (dd, *J* = 8.3, 2.2 Hz, 1 H), 7.34 (m, 6 H), 7.63 (s, 1 H), 7.68 (d, *J* = 7.5 Hz, 1 H). <sup>13</sup>C NMR (75 MHz, CDCl<sub>3</sub>): δ 5.3, 6.8, 9.9, 15.1, 19.9, 22.7, 26.6, 37.2, 38.2, 42.6, 47.2, 55.4, 58.5, 67.9, 69.9, 72.3, 74.5, 76.5, 78.7, 79.2, 80.6, 84.2, 144.6, 120.0, 122.5, 128.3, 128.4, 128.5, 129.6, 130.6, 132.3, 135.2, 144.7, 154.3, 159.6, 166.9, 170.7, 201.5.

**2-Debenzoyl-2-(3-methoxybenzoyl)-7-triethylsilyl-10-deacetyl-10-(2-methoxybenzoyl)-**

**baccatin III (11k):** White solid; 40% (80% at 50% conversion); <sup>1</sup>H (300 MHz, CDCl<sub>3</sub>) δ 0.58 (m, 6 H), 0.91 (q, *J* = 7.8 Hz, 9 H), 1.10 (s, 3 H), 1.12 (s, 3 H), 1.37 (s, 3 H), 1.92 (m, 2 H), 1.97 (bs, 1 H), 2.19 (s, 3 H), 2.30 (s, 3 H), 2.55 (m, 1 H), 3.54 (m, 1 H), 3.85 (m, 7 H), 3.94 (d, *J* = 6.9 Hz, 1 H), 4.15 (d, *J* = 7.8 Hz, 1 H), 4.34 (d, *J* = 7.8 Hz, 1 H), 4.53 (dd, *J* = 6.6 Hz, 3.6 Hz, 1 H), 4.84 (m, 1H), 4.97 (d, *J* = 7.8 Hz, 1 H), 5.66 (d, *J* = 6.9 Hz, 1 H), 6.69 (s, 1 H), 6.95-7.07 (m, 2 H), 7.14-7.19 (m, 1 H), 7.28-7.42 (m, 2 H), 7.65-7.73 (m, 2 H), 8.01 (m, 1 H).

**2-Debenzoyl-2-(3-methoxybenzoyl)-7-triethylsilyl-10-deacetyl-10-(4-methoxyphenylacetyl)-**

**baccatin III (11l):** White solid; 82%; <sup>1</sup>H NMR (400 MHz, CDCl<sub>3</sub>) δ 0.55 (m, 6 H), 0.89 (m, 9 H), 0.92 (s, 3 H), 1.09 (s, 3 H), 1.27 (s, 3 H), 1.68 (s, 3 H), 1.87 (m, 1 H), 2.17 (s, 3 H), 2.24 (m, 2 H), 2.25 (s, 3 H), 2.50 (m, 1 H), 3.69 (d, *J* = 3.6 Hz, 1 H), 3.78 (s, 1 H), 3.85 (dd, *J* = 7.2, 1.6 Hz, 1 H), 3.86 (s, 3 H), 4.14 (d, *J* = 8.4 Hz, 1 H), 4.33 (d, *J* = 8.0 Hz, 1 H), 4.47 (dd, *J* = 10.8, 6.8 Hz, 1 H), 4.78 (t, *J* = 7.9 Hz, 1 H), 4.95 (d, *J* = 9.6 Hz, 1 H), 5.60 (d, *J* = 6.8 Hz, 1 H), 6.85 (dt, *J* = 6.8, 2.8 Hz, 2 H), 7.13 (dt, *J* = 8.4, 0.8 Hz, 1 H), 7.24 (d, *J* = 8.8 Hz, 2 H), 7.37 (t, *J* = 8.0 Hz, 1 H), 7.64 (t, *J* = 1.2 Hz, 1 H), 7.70 (dd, *J* = 6.4, 0.8 Hz, 1 H).

## Characterization data (<sup>1</sup>H NMR) for 16a-g

**(3R,4S)-1-Cyclopentyloxycarbonyl-3-triisopropylsiloxy-4-(2-methylprop-1-enyl)-azetid-2-one (16a)**: White solid; 80%; mp: 54-56 °C; <sup>1</sup>H NMR (400 MHz, CDCl<sub>3</sub>) δ 1.05 (m, 21 H), 1.5-1.7 (m, 14 H), 4.77 (dd, *J* = 10.0, 6.0 Hz, 1 H), 4.99 (d, *J* = 6.0 Hz, 1 H), 5.18 (m, 1 H), 5.29 (d, *J* = 10.0 Hz); <sup>13</sup>C NMR (CDCl<sub>3</sub>) δ 11.8, 17.5, 18.2, 23.5, 26.0, 32.7, 56.7, 77.4, 79.6, 118.0, 140.1, 149.1, 166.1.

**(3R,4S)-1-Cyclohexyloxycarbonyl-3-*tert*-butyldimethylsiloxy-4-(2-methylprop-1-enyl)azetid-2-one (16b)**. Colorless viscous oil; 80%; <sup>1</sup>H NMR (300 MHz, CDCl<sub>3</sub>) δ 0.060 (s, 3 H), 0.119 (s, 3 H), 0.873 (s, 9 H), 1.2-1.6 (m, 6 H), 1.65-1.9 (m, 10 H), 4.76 (m, 2 H), 4.88 (d, *J* = 5.7 Hz, 1 H), 5.24 (d, *J* = 9.6 Hz).

**(3R,4S)-1-(Cyclopent-1-enylcarbonyl)-3-triisopropylsiloxy -4-(2-methylprop-1-enyl)azetid-2-one (16c)**. Colorless viscous oil; 95%; <sup>1</sup>H NMR (300 MHz, CDCl<sub>3</sub>) δ 1.05 (s, 21 H), 1.76 (s, 3 H), 1.82 (s, 3 H), 1.85-2.02 (m, 2 H), 2.55-2.61 (m, 4 H), 4.88-4.97 (m, 2 H), 5.26 (d, *J* = 11.1 Hz, 1 H), 7.30 (s, 1 H).

**(3R,4S)-1-(Cyclohex-1-enylcarbonyl)-3-triisopropylsiloxy-4-(2-methylprop-1-enyl)azetid-2-one (16d)**. Colorless viscous oil; 97%; <sup>1</sup>H NMR (300 MHz, CDCl<sub>3</sub>) δ 1.05 (s, 21 H), 1.76 (s, 3 H), 1.82 (s, 3 H), 1.85-2.02 (m, 2 H), 2.55-2.61 (m, 4 H), 4.88-4.97 (m, 2 H), 5.26 (d, *J* = 11.1 Hz, 1 H), 7.30 (s, 1 H).

**(3R,4S)-1-Cyclopropanecarbonyl-3-triisopropylsiloxy-4-(2-methylprop-1-enyl)azetid-2-one (16e)**. Colorless viscous oil; 100%; <sup>1</sup>H NMR (300 MHz, CDCl<sub>3</sub>) δ 1.05 (m, 25 H), 1.78 (s, 6 H), 2.57 (m, 1 H), 4.82 (dd, *J* = 6.3 Hz, *J* = 9.9 Hz, 1 H), 5.04 (d, *J* = 6.3 Hz, 1 H), 5.25 (d, *J* = 9.9 Hz, 1 H).

**(3R,4S)-1-Cyclobutanecarbonyl-3-triisopropylsiloxy-4-(2-methylprop-1-enyl)azetid-2-one (16f)**. Colorless oil; 91%; <sup>1</sup>H NMR (300 MHz, CDCl<sub>3</sub>) δ 1.05 (m, 21 H), 1.77 (s, 3 H), 1.80 (s, 3 H), 1.97 (m, 2 H), 2.21 (m, 4 H), 3.69 (m, 1 H), 4.79 (dd, *J* = 6.0 Hz, *J* = 9.6 Hz, 1 H), 4.98 (d, *J* = 6.0 Hz, 1 H), 5.21 (d, *J* = 9.6 Hz, 1 H).

**(3R,4S)-1-Cyclopentanecarbonyl-3-triisopropylsiloxy-4-(2-methylprop-1-enyl)azetid-2-one (16g)**. Colorless oil; 80%; <sup>1</sup>H NMR (300 MHz, CDCl<sub>3</sub>) δ 1.09 (m, 21 H), 1.56-1.77 (m, 6 H), 1.79 (s, 3 H), 1.80 (s, 3 H), 1.83-1.99 (m, 2 H), 3.36 (m, 1 H), 4.81 (dd, *J* = 6.0 Hz, *J* = 9.6 Hz, 1 H), 5.00 (d, *J* = 6.0 Hz, 1 H), 5.22 (dt, *J* = 9.6, 1.5 Hz, 1 H).



# <sup>1</sup>H NMR Spectrum of 6a

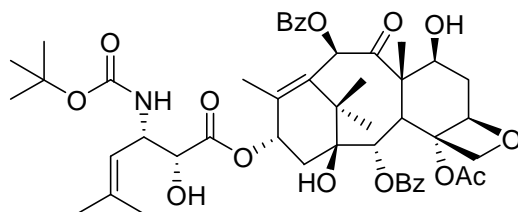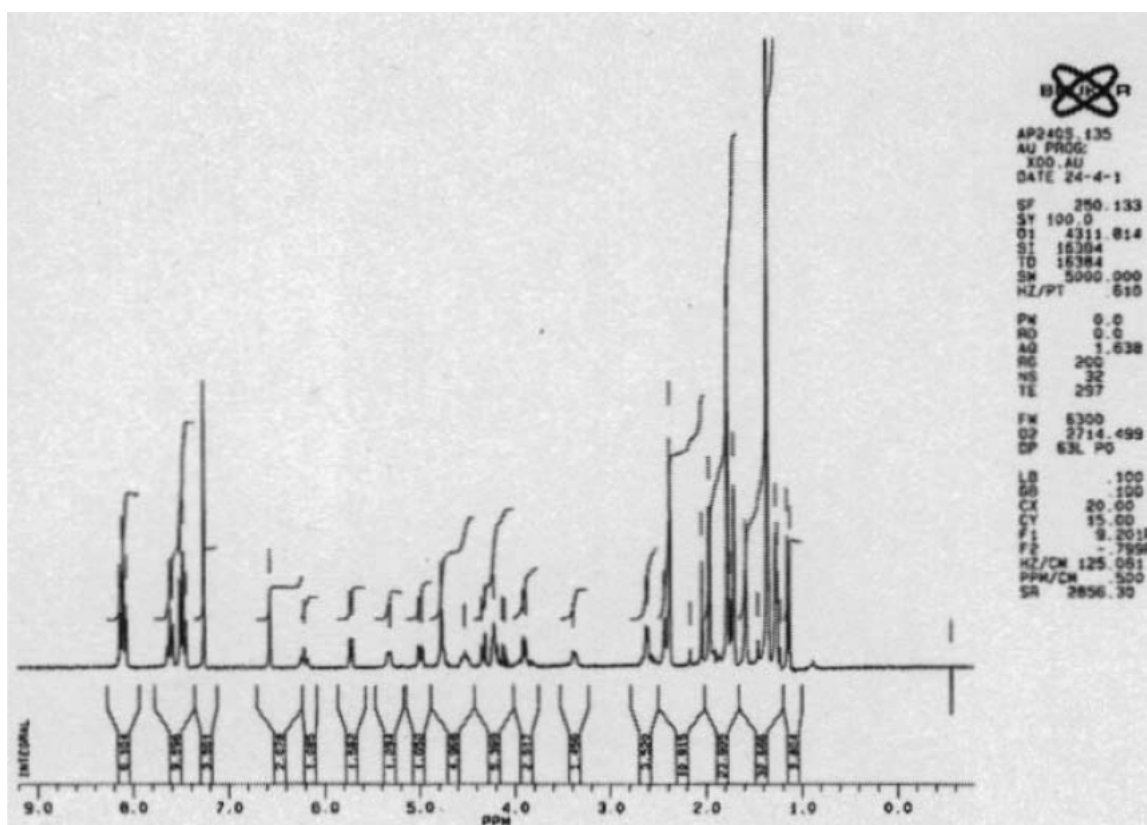

<sup>13</sup>C NMR Spectrum of **6a**

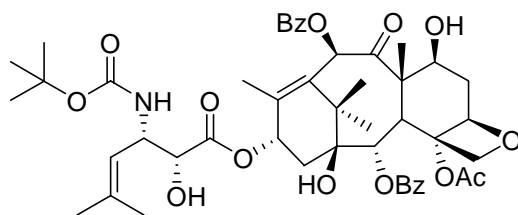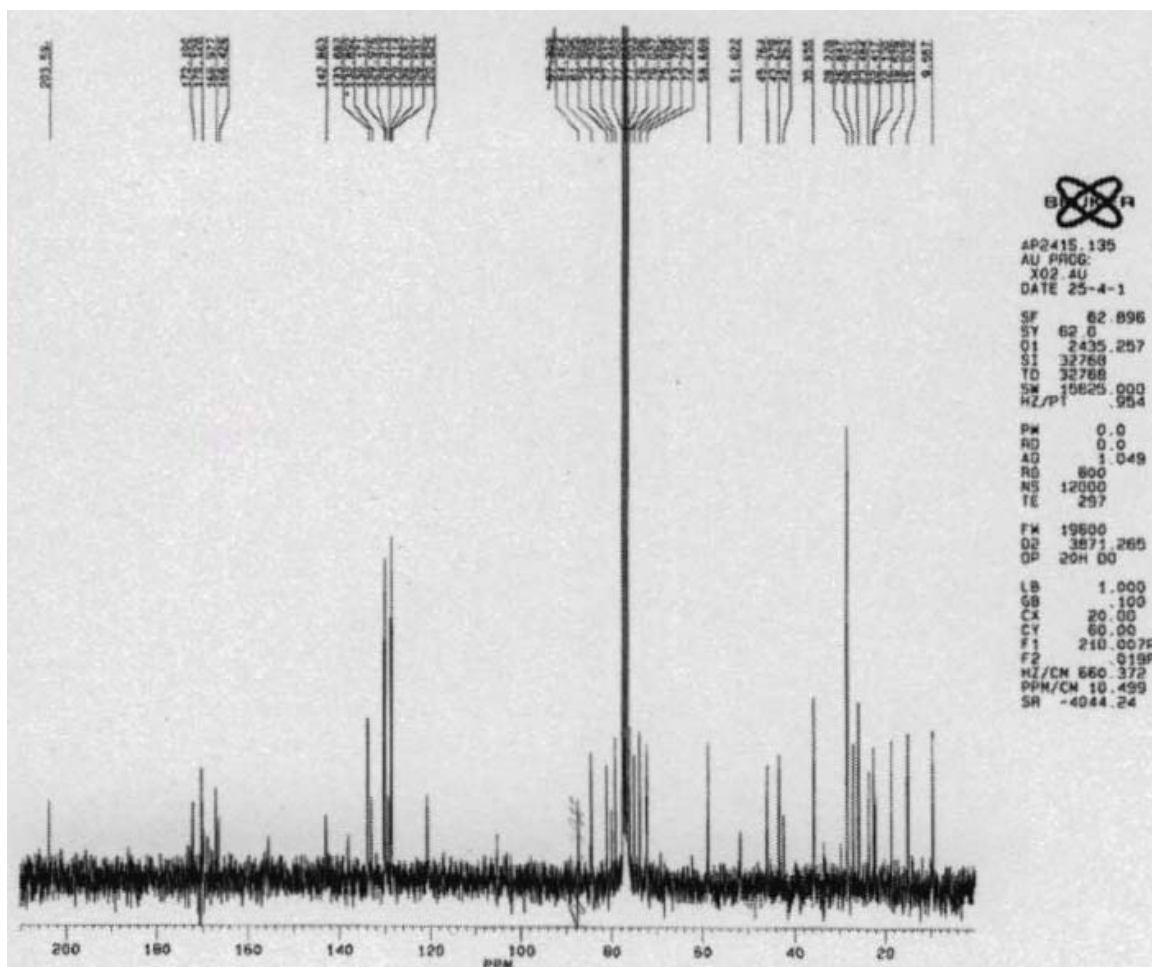

# $^1\text{H}$ NMR Spectrum of **6b**

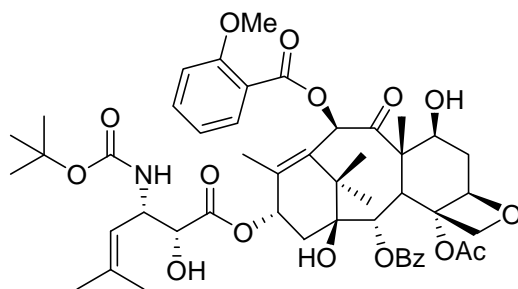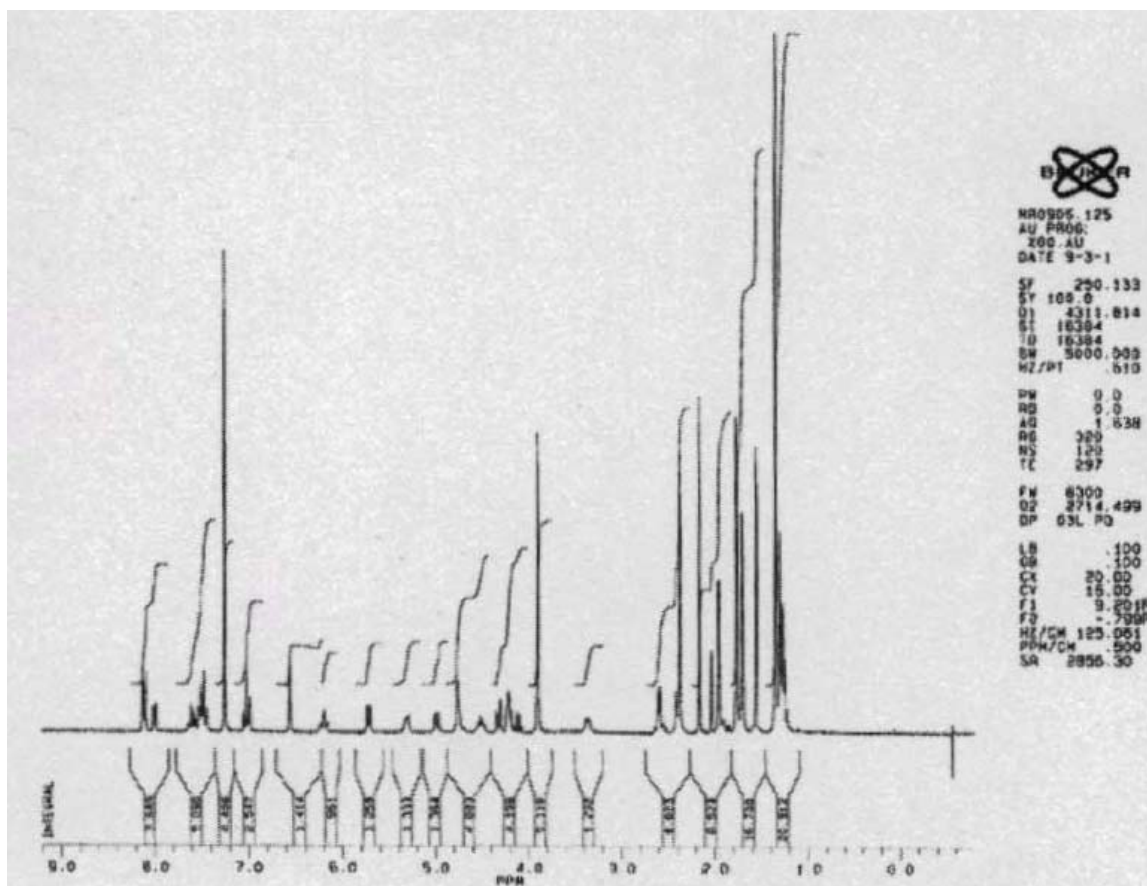

$^{13}\text{C}$  NMR Spectrum of **6b**

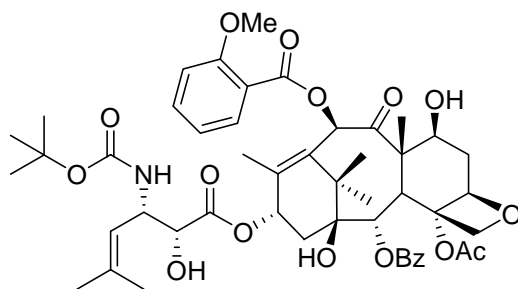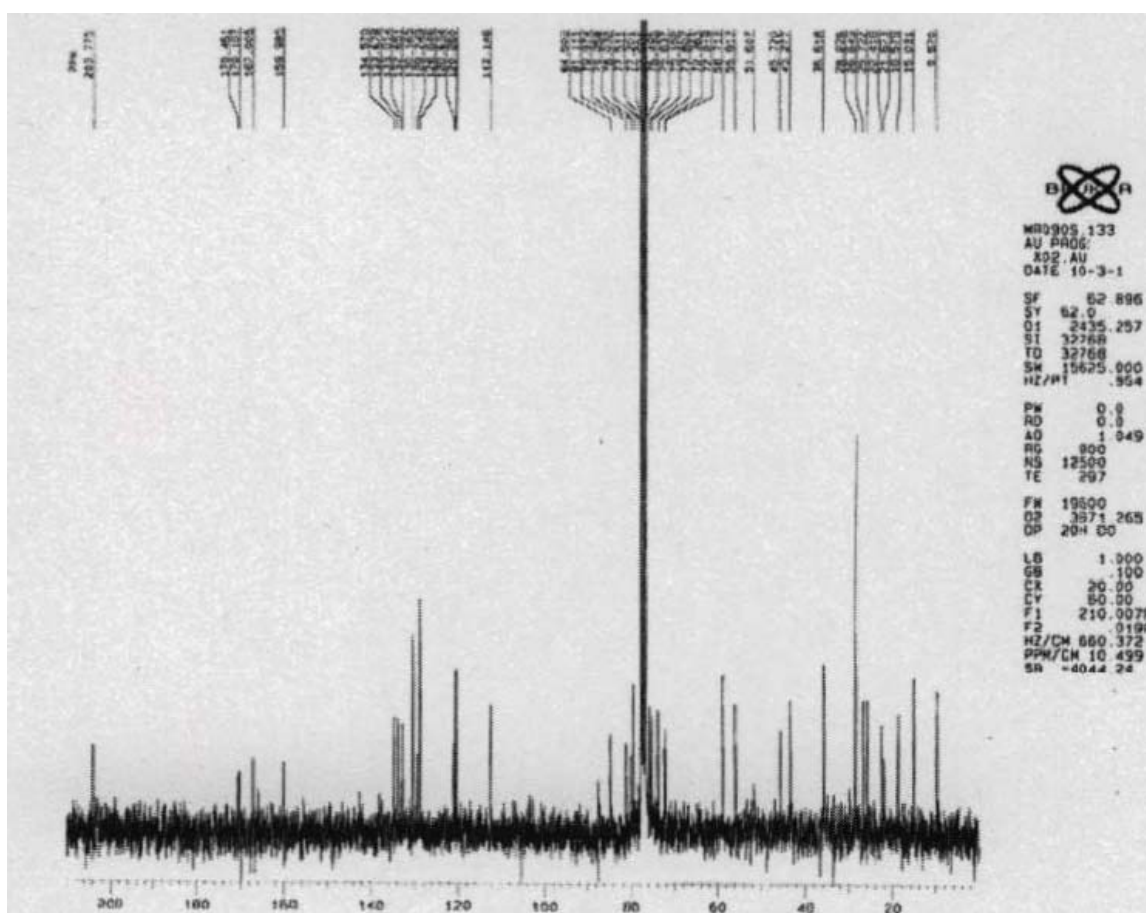

# $^1\text{H}$ NMR Spectrum of **6c**

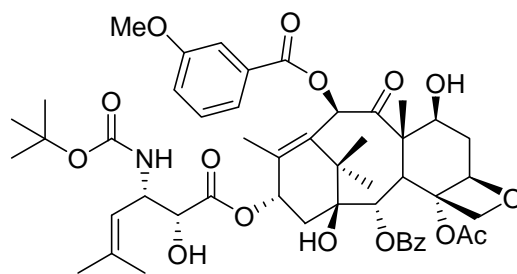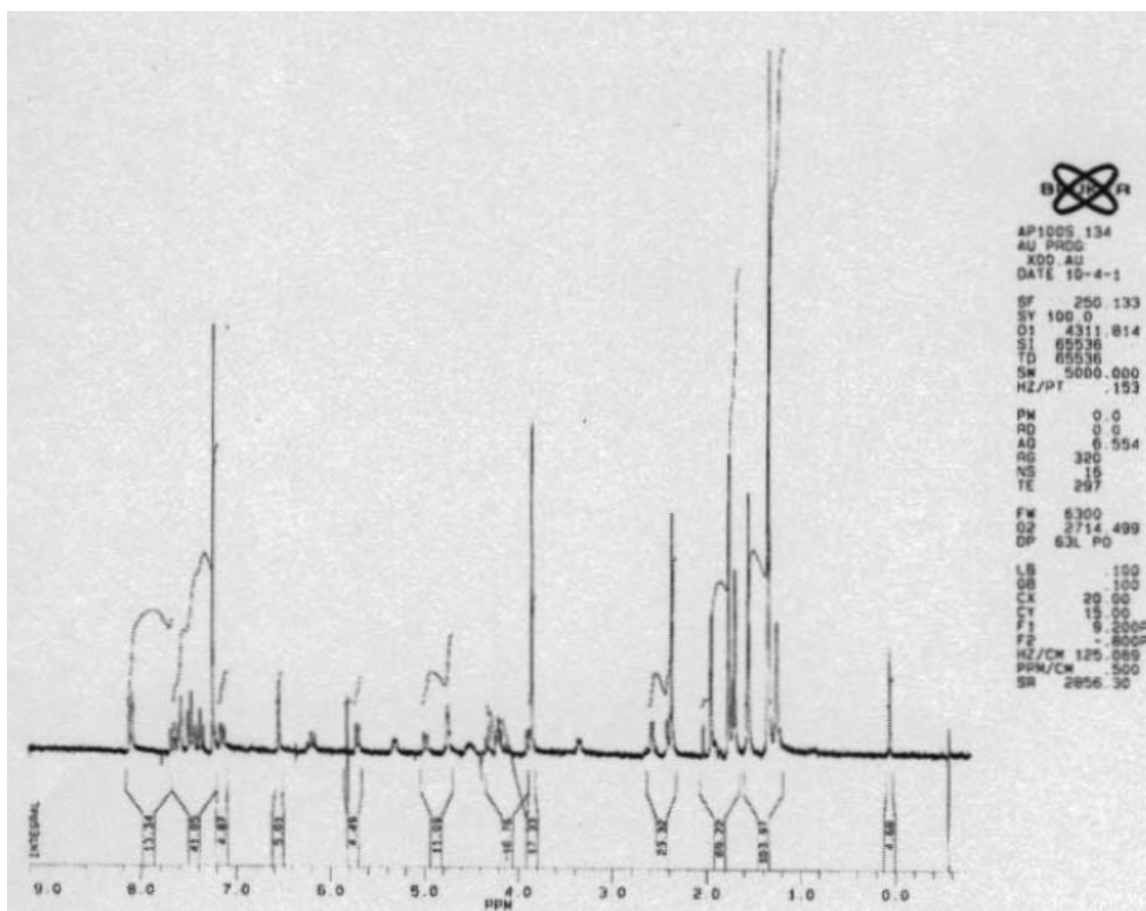

$^{13}\text{C}$  NMR Spectrum of **6c**

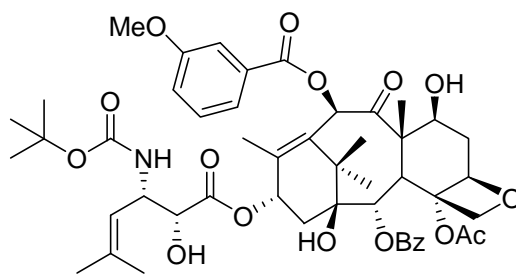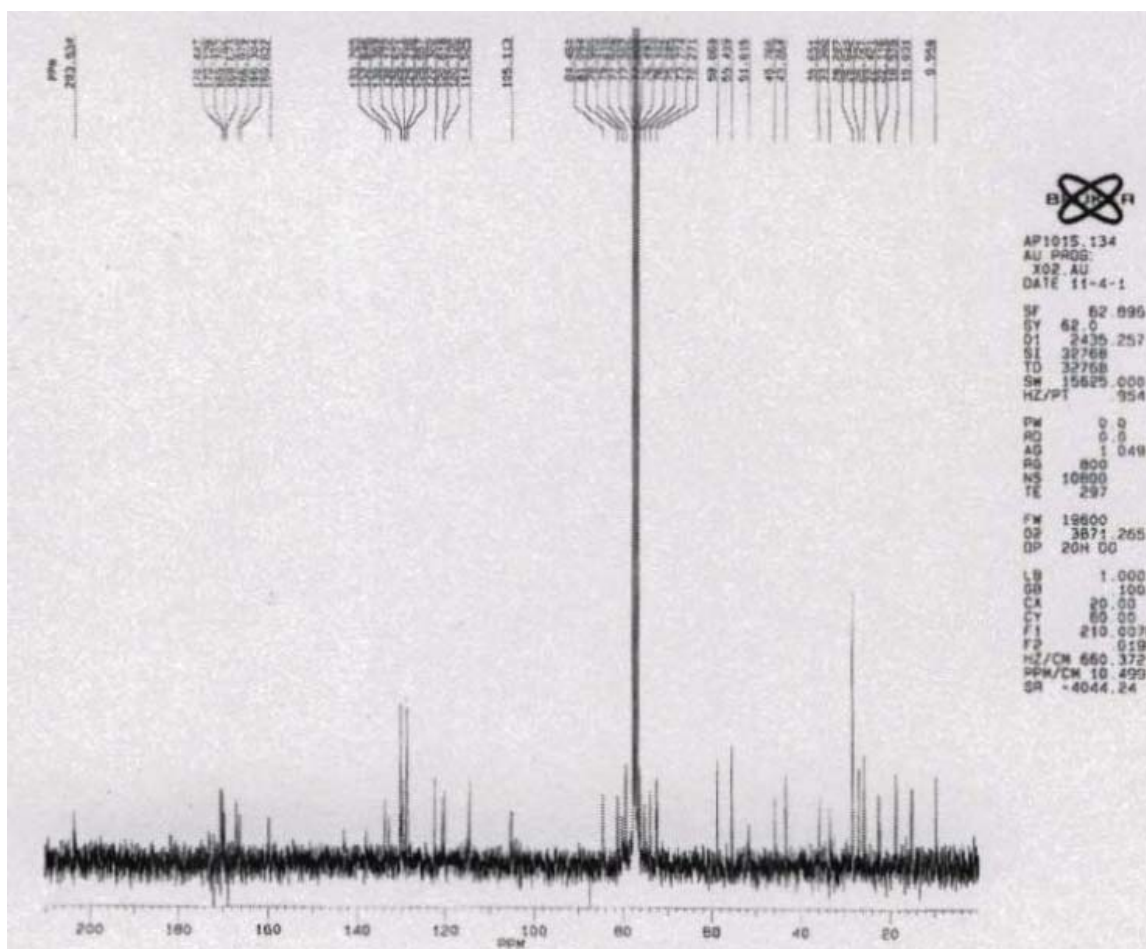

<sup>1</sup>H NMR Spectrum of **6d**

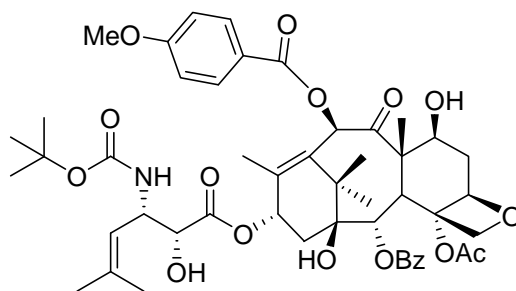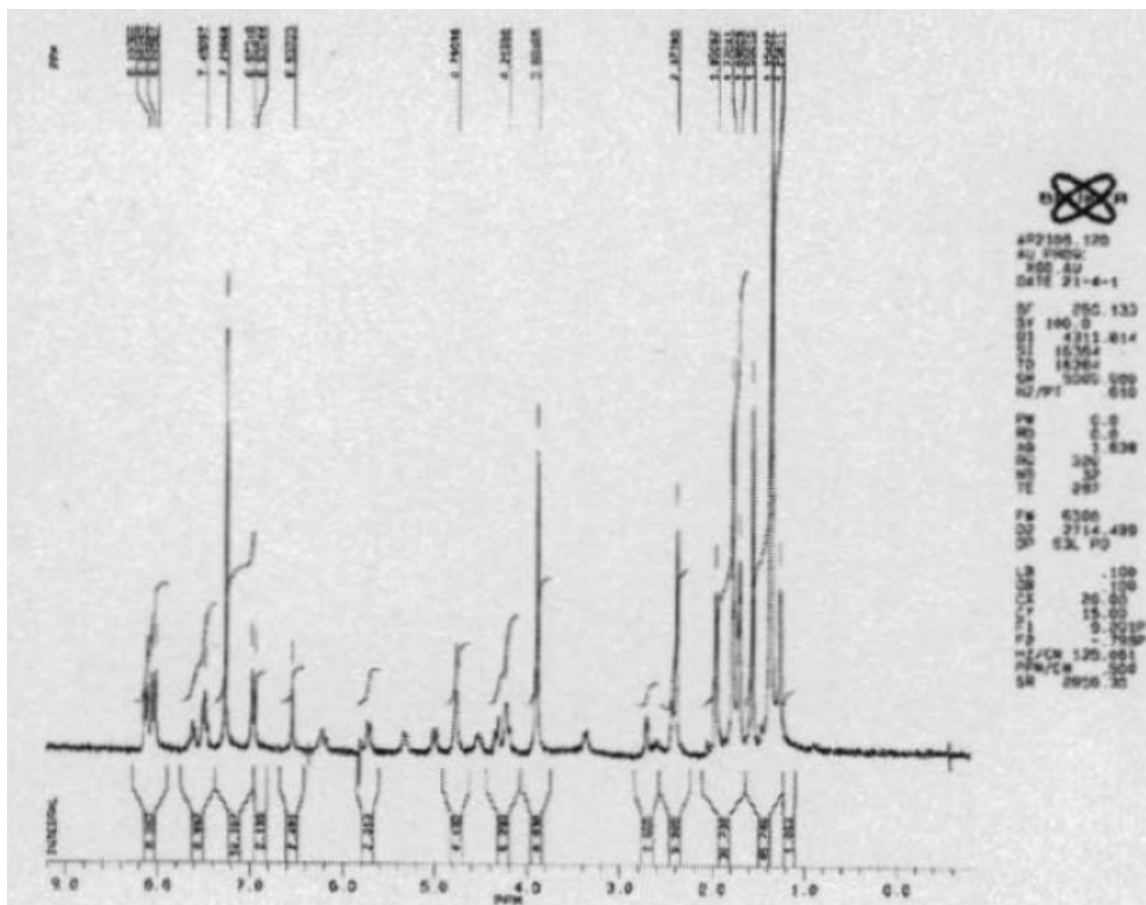

# $^1\text{H}$ NMR Spectrum of **6e**

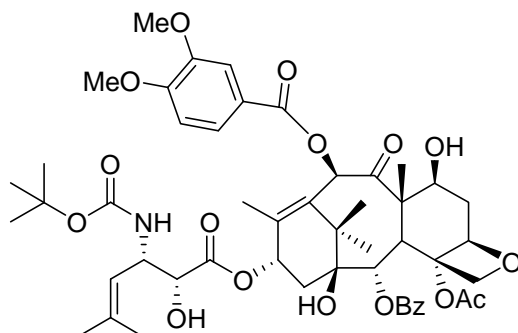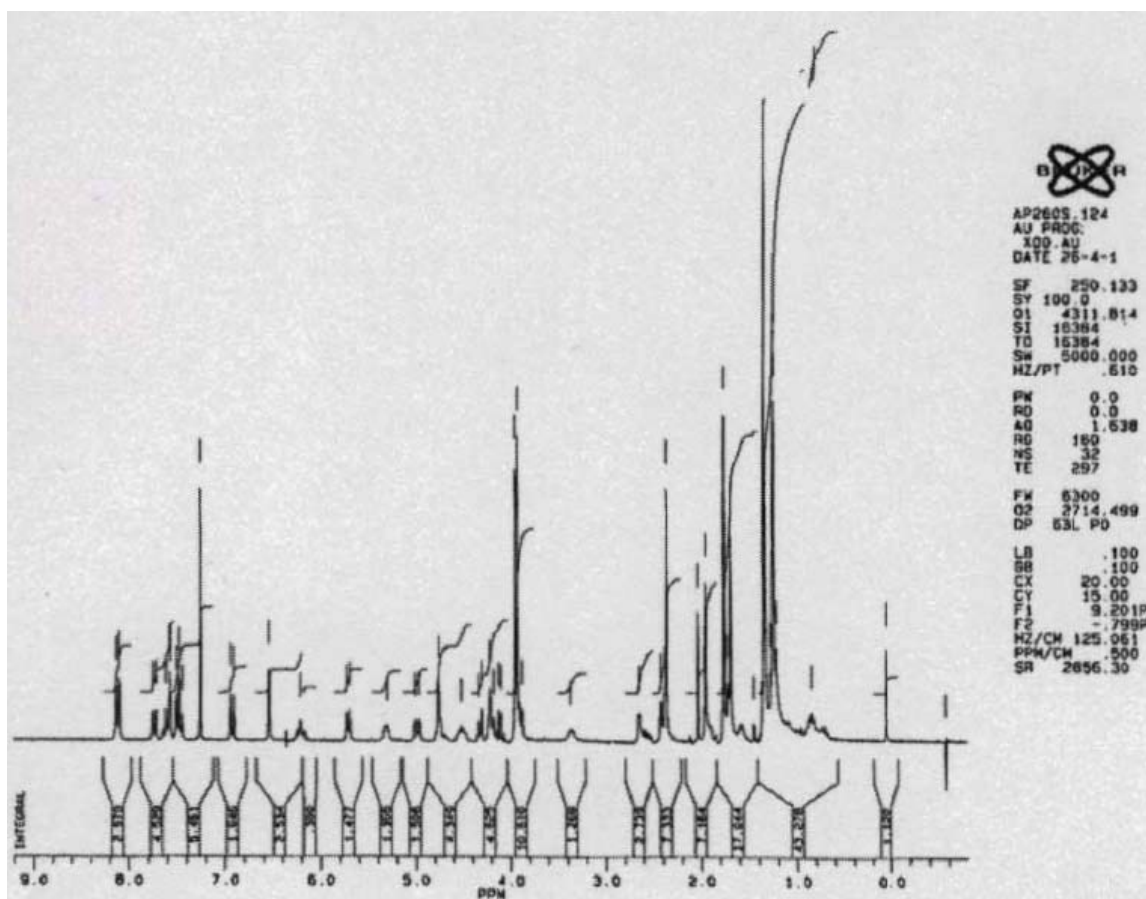



$^{13}\text{C}$  NMR Spectrum of **6e**

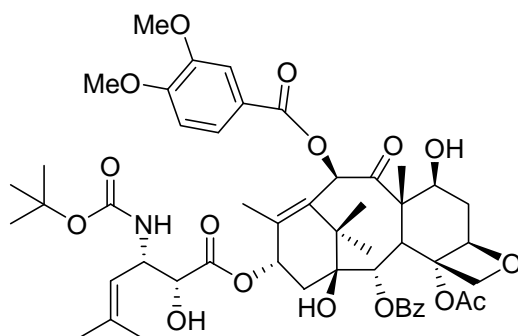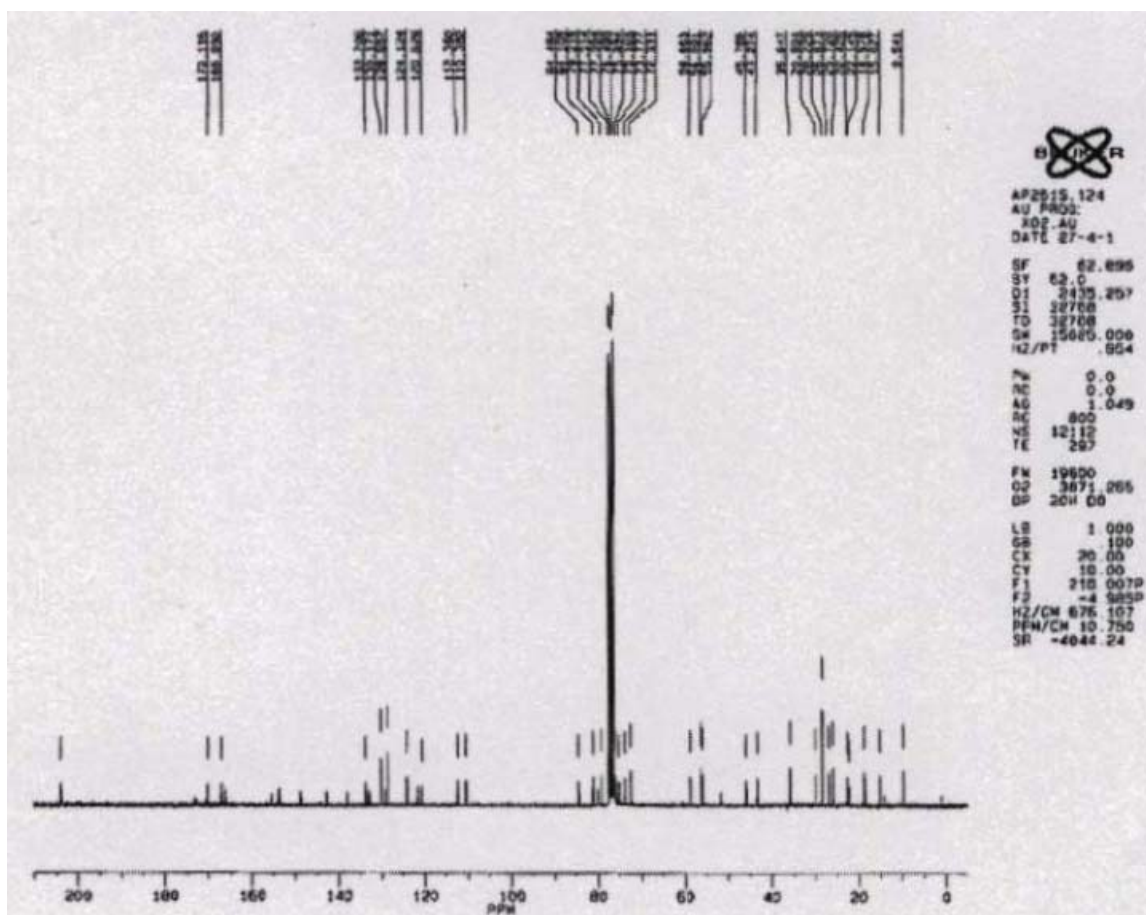

<sup>1</sup>H NMR Spectrum of **6f**

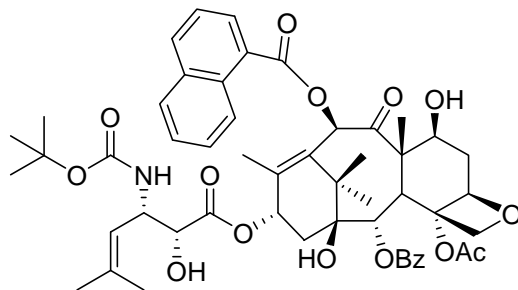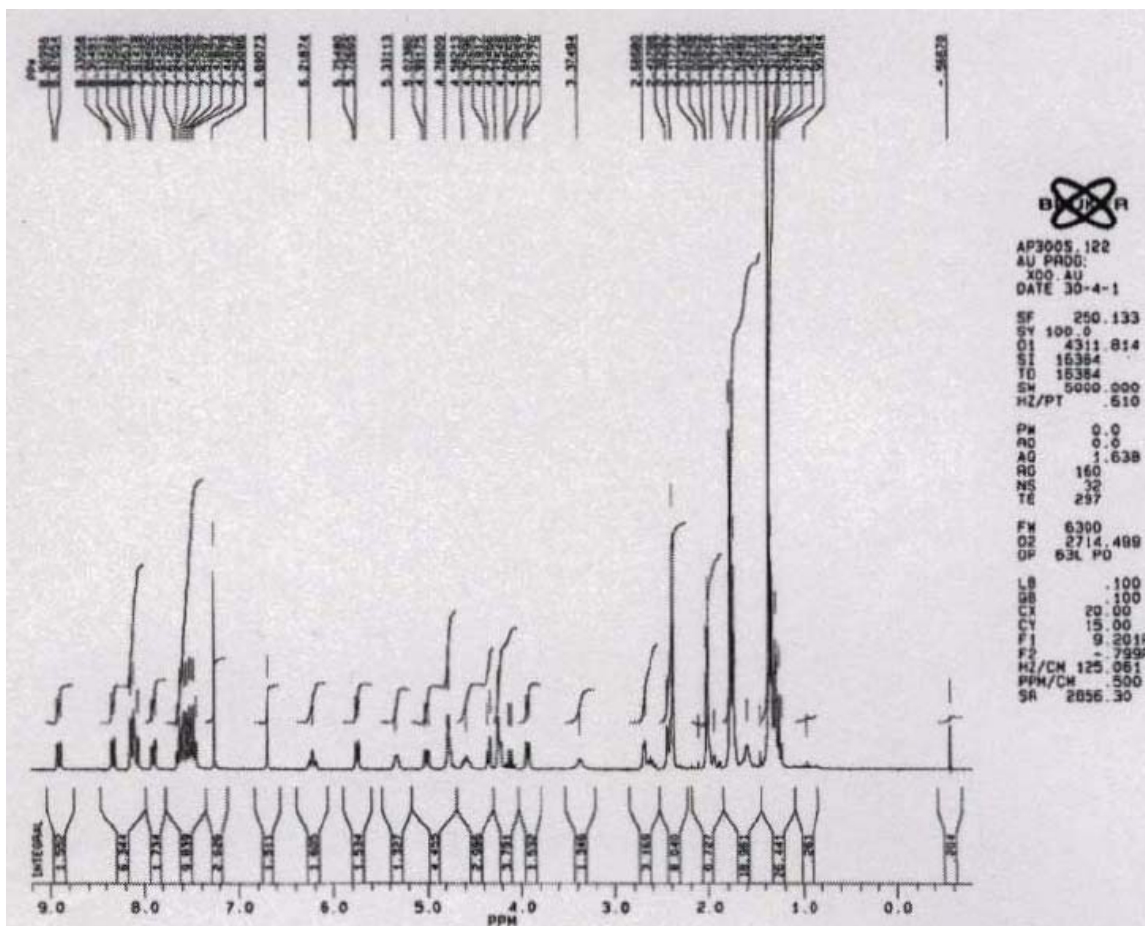

<sup>13</sup>C NMR Spectrum of **6f**

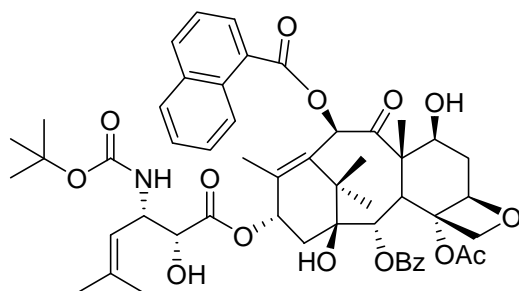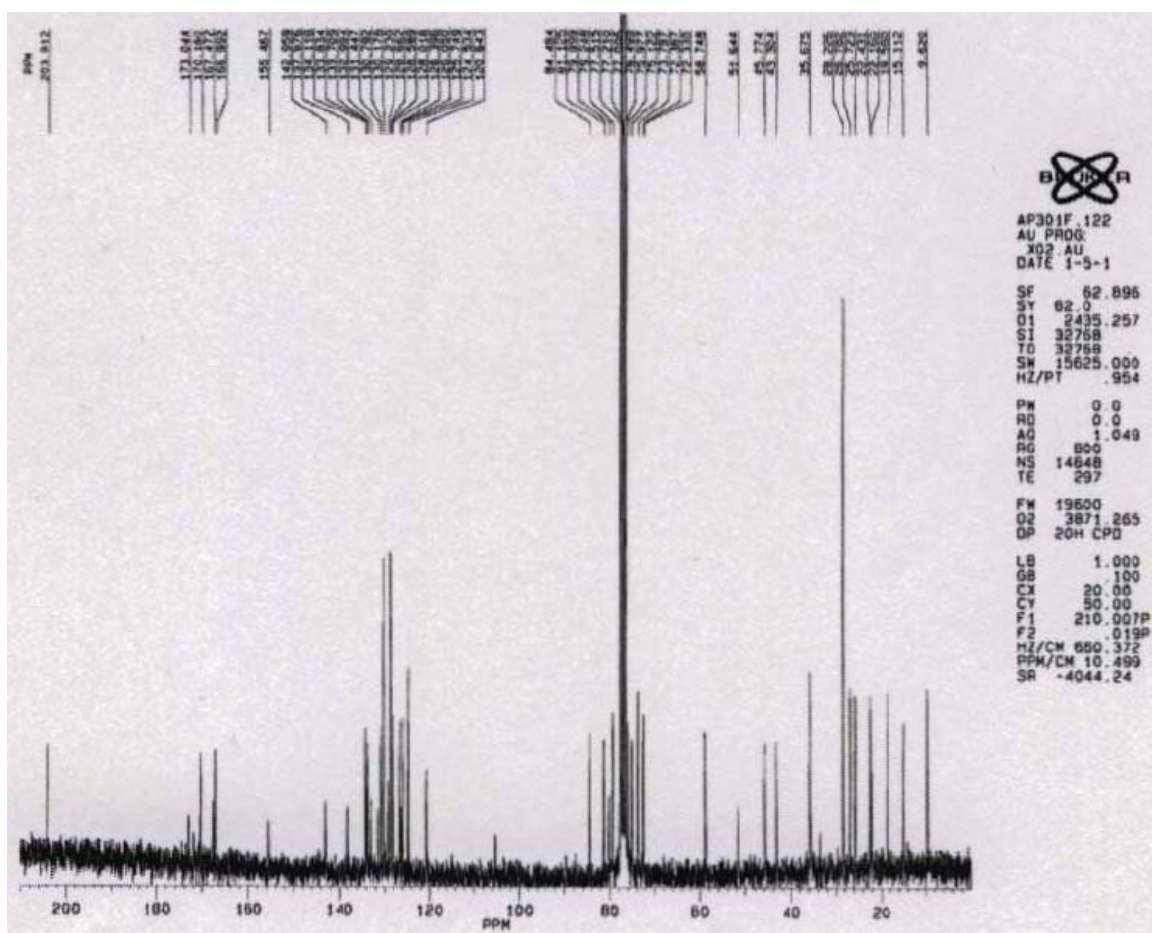

<sup>1</sup>H NMR Spectrum of **6g**

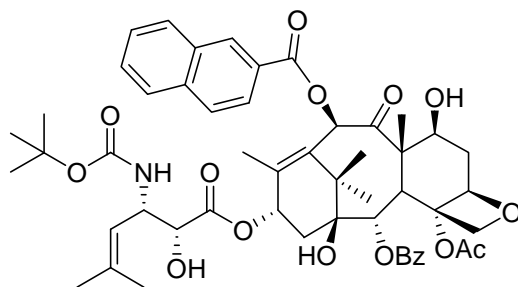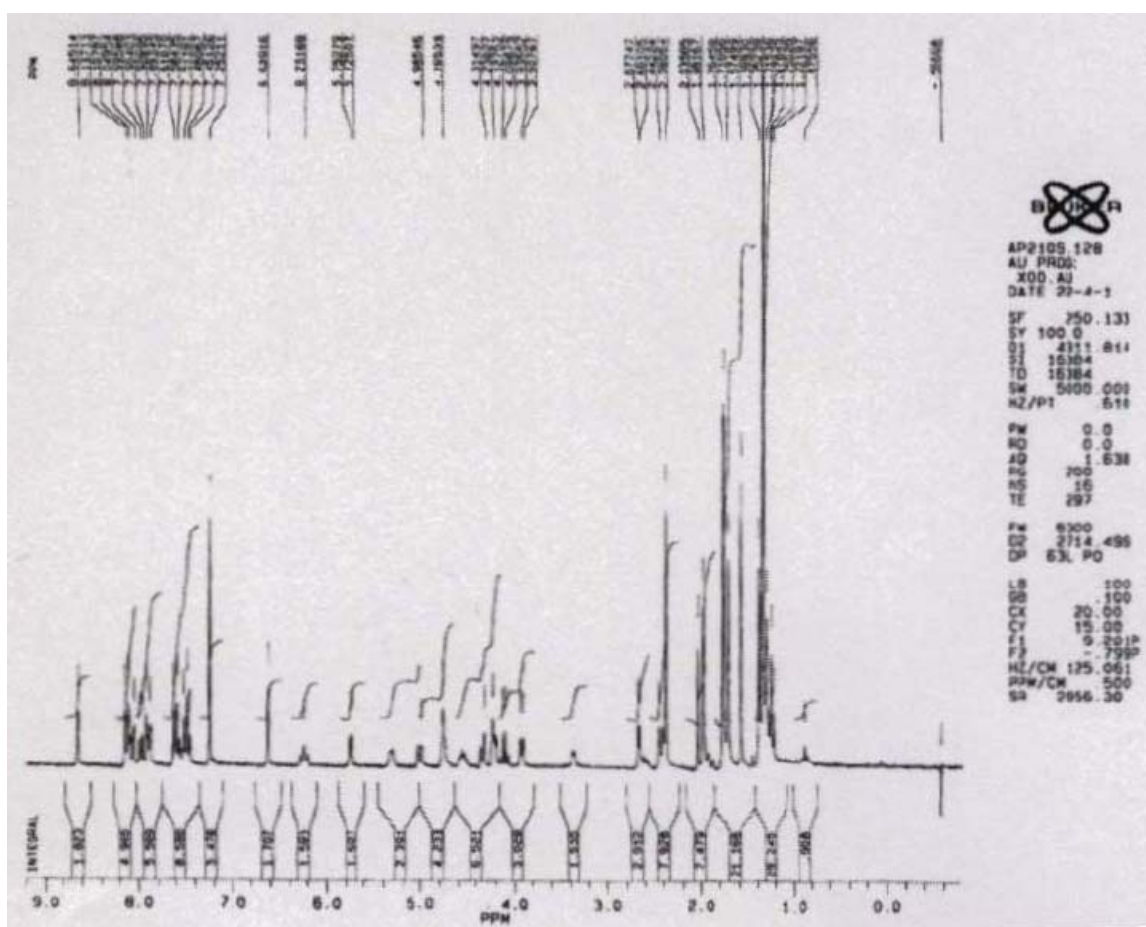

$^{13}\text{C}$  NMR Spectrum of **6g**

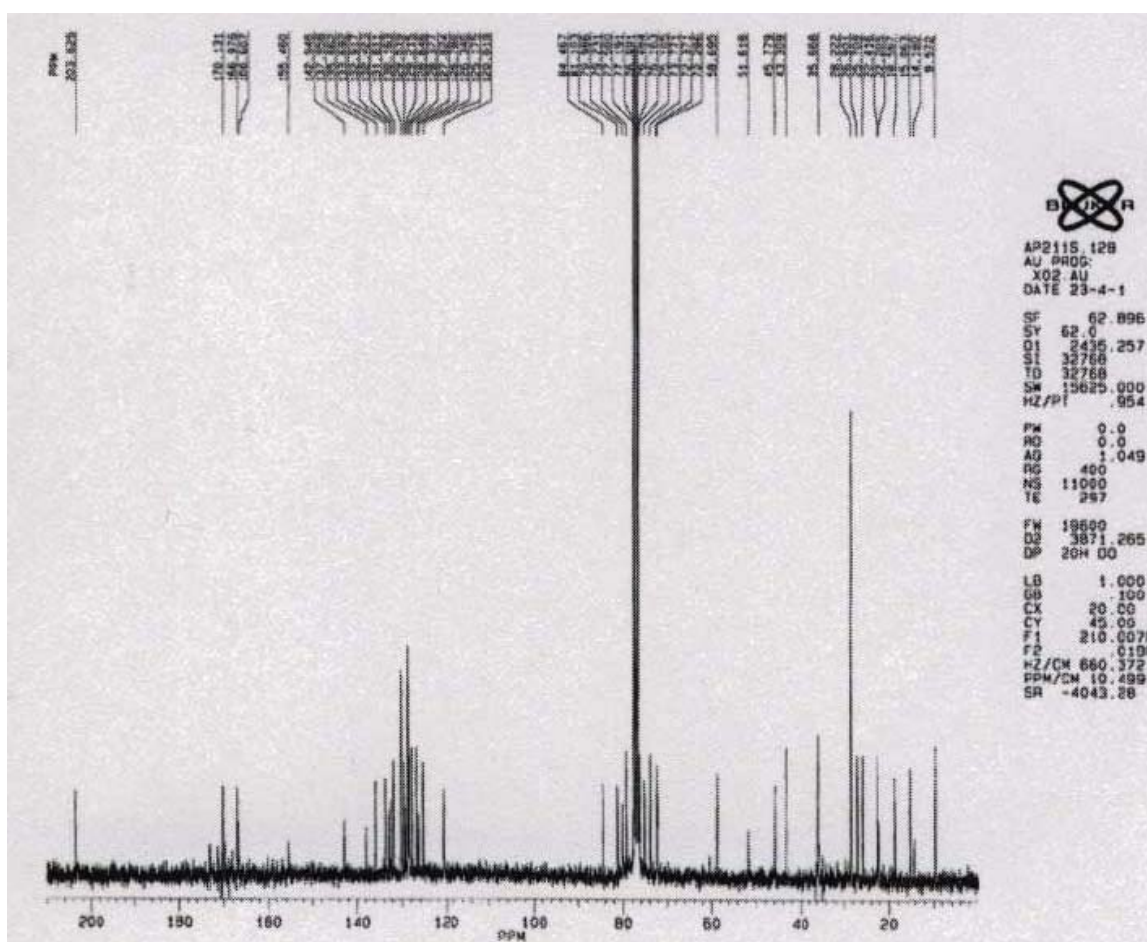

<sup>1</sup>H NMR Spectrum of 6h

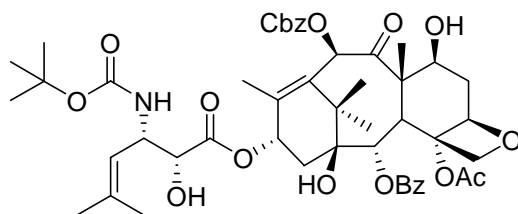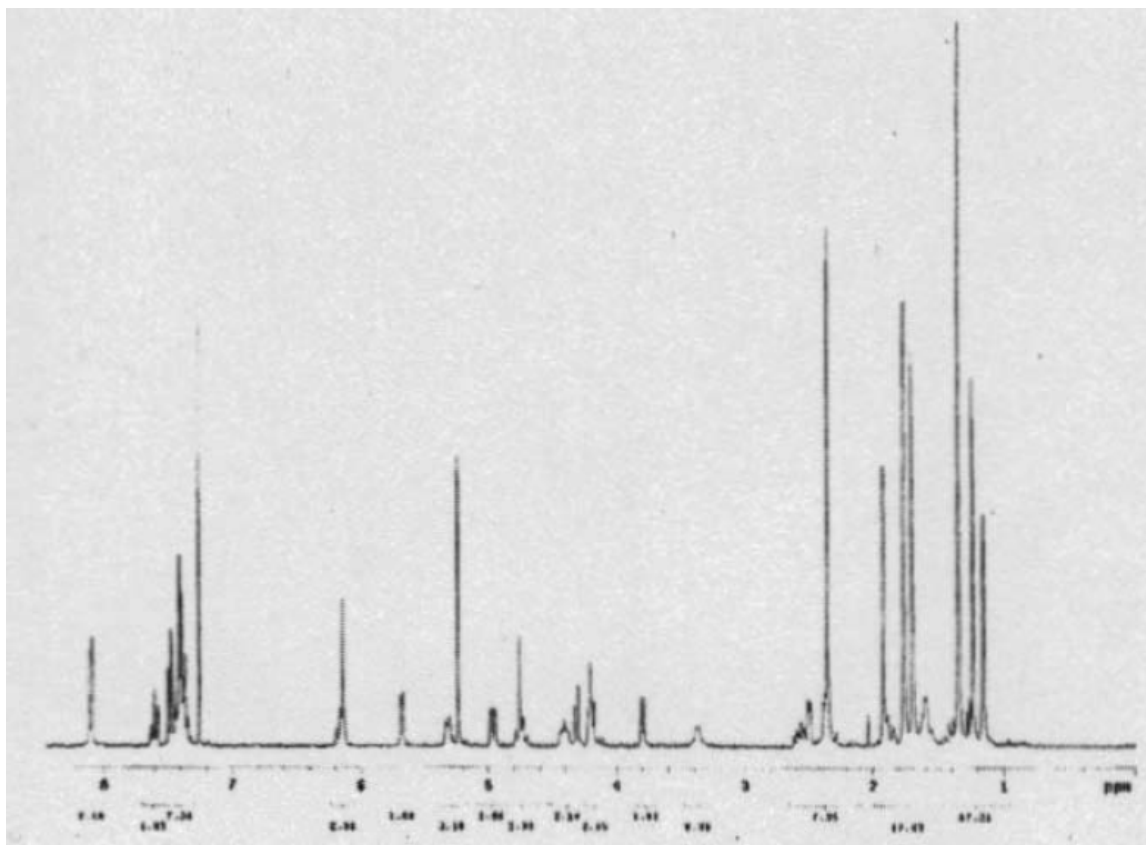

$^{13}\text{C}$  NMR Spectrum of **6h**

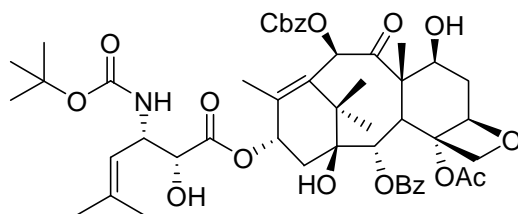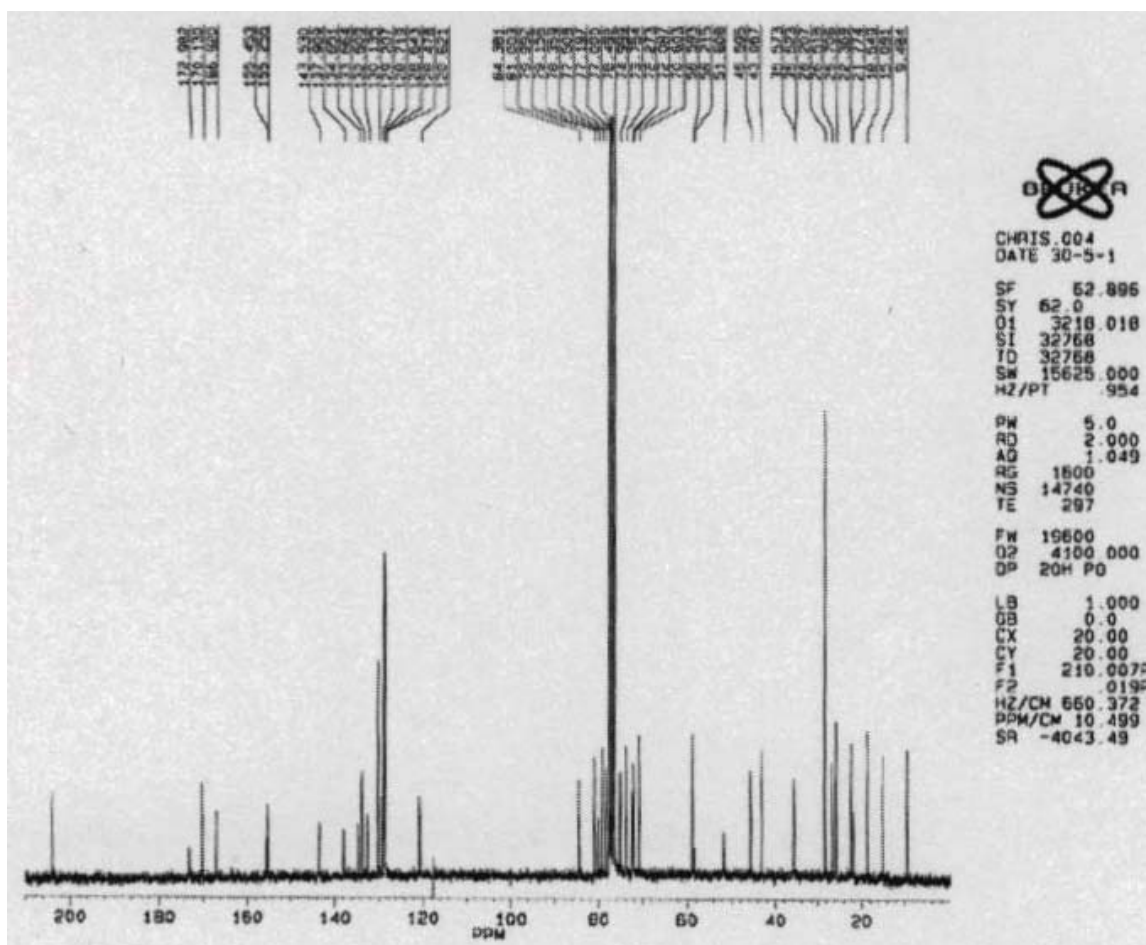

$^1\text{H}$  NMR Spectrum of **6i**

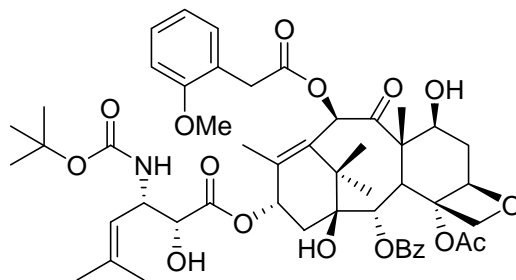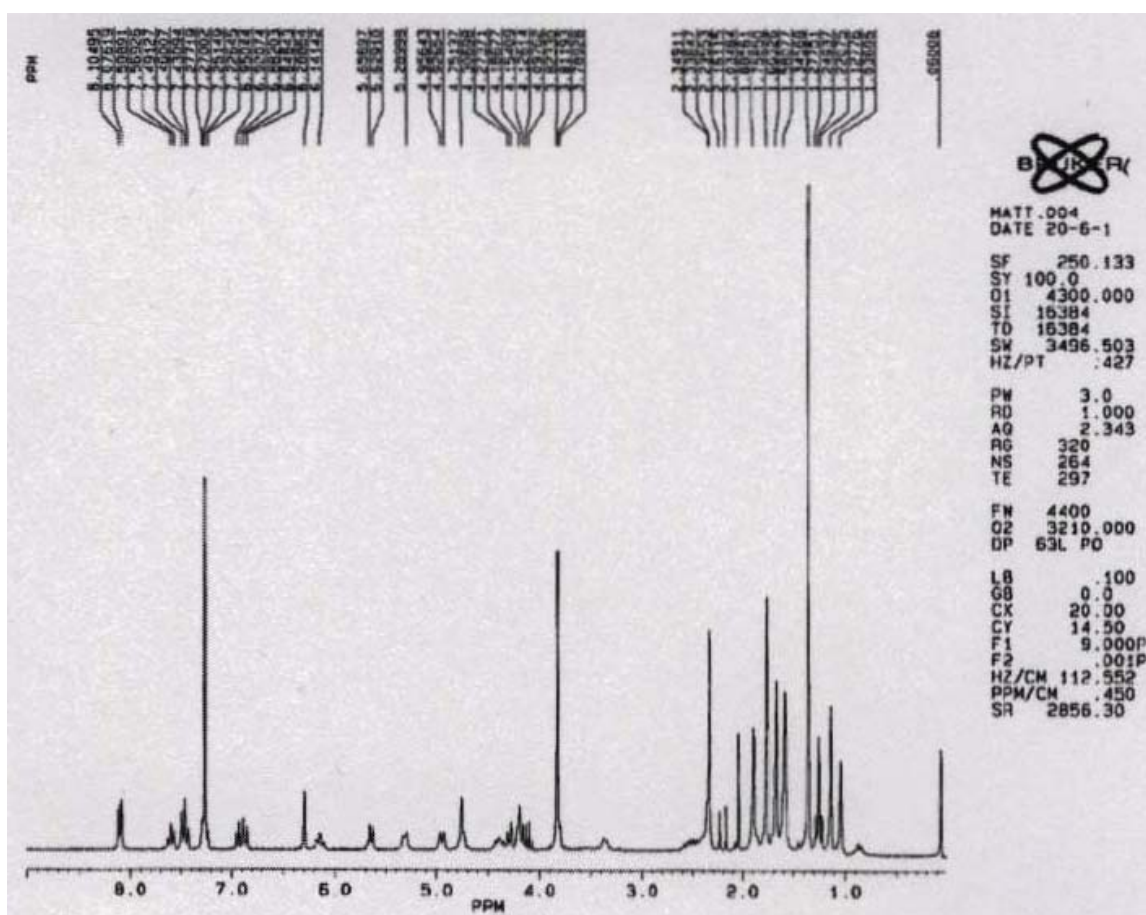



# <sup>1</sup>H NMR Spectrum of 6j

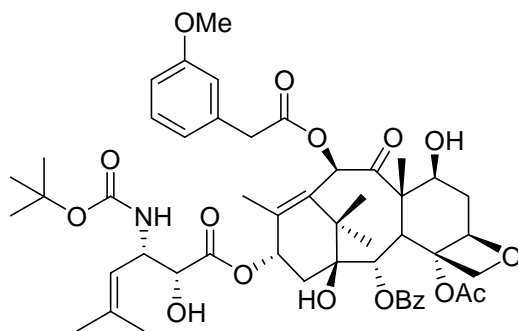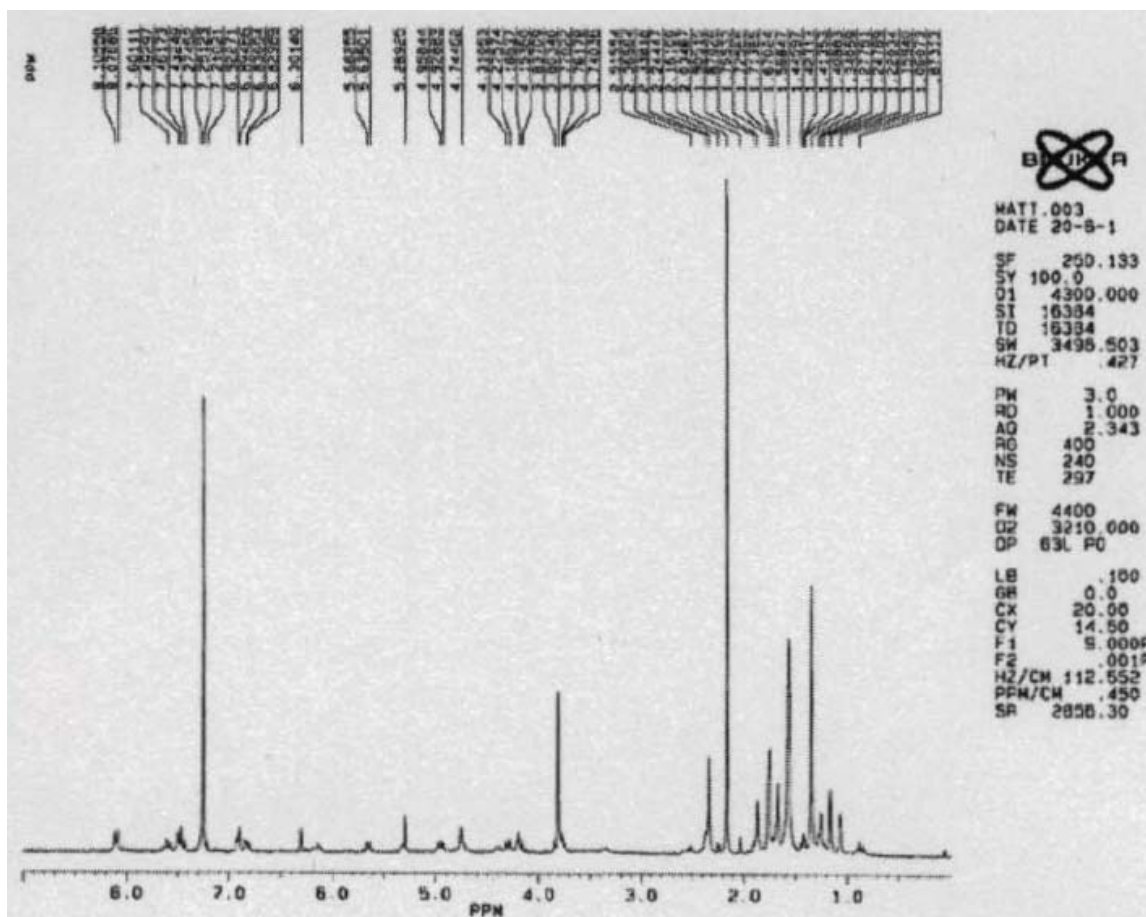

<sup>1</sup>H NMR Spectrum of **6m**

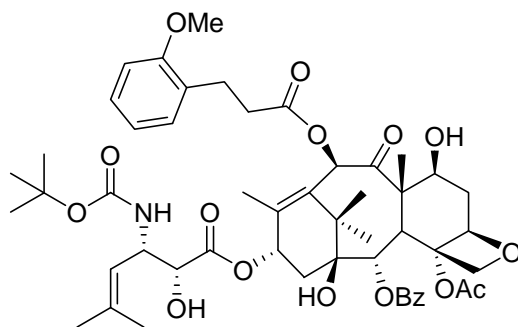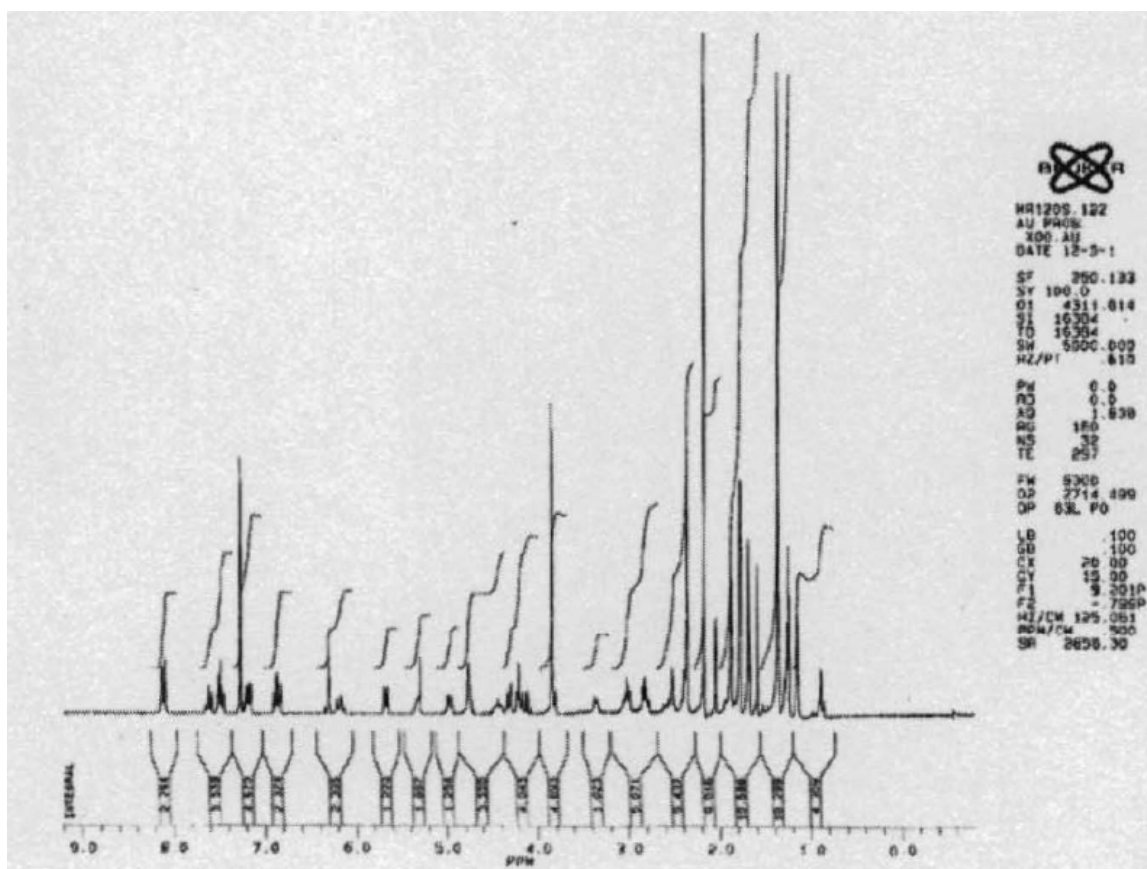

$^{13}\text{C}$  NMR Spectrum of **6m**

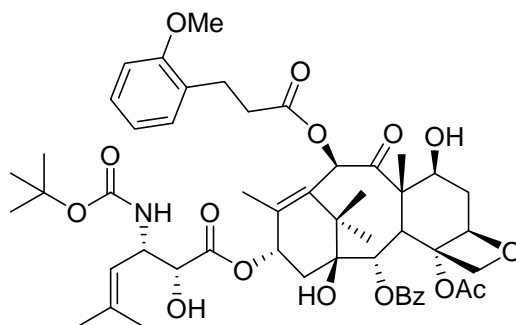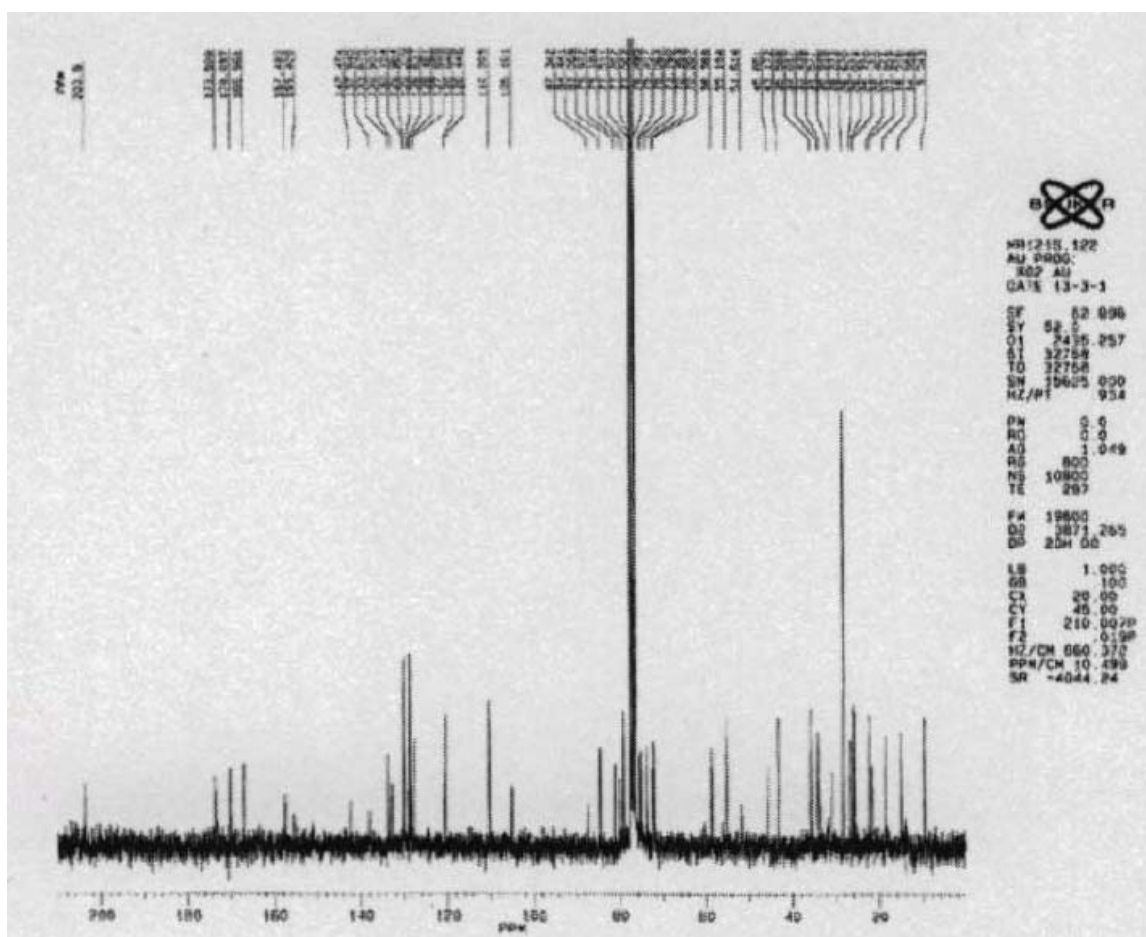

# $^1\text{H}$ NMR Spectrum of **6n**

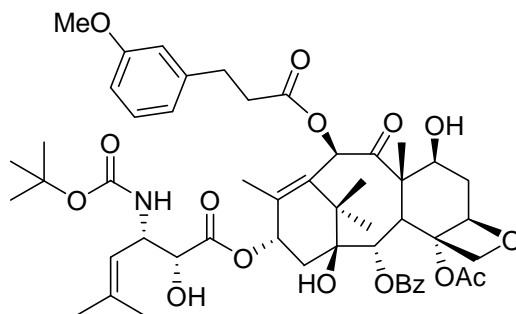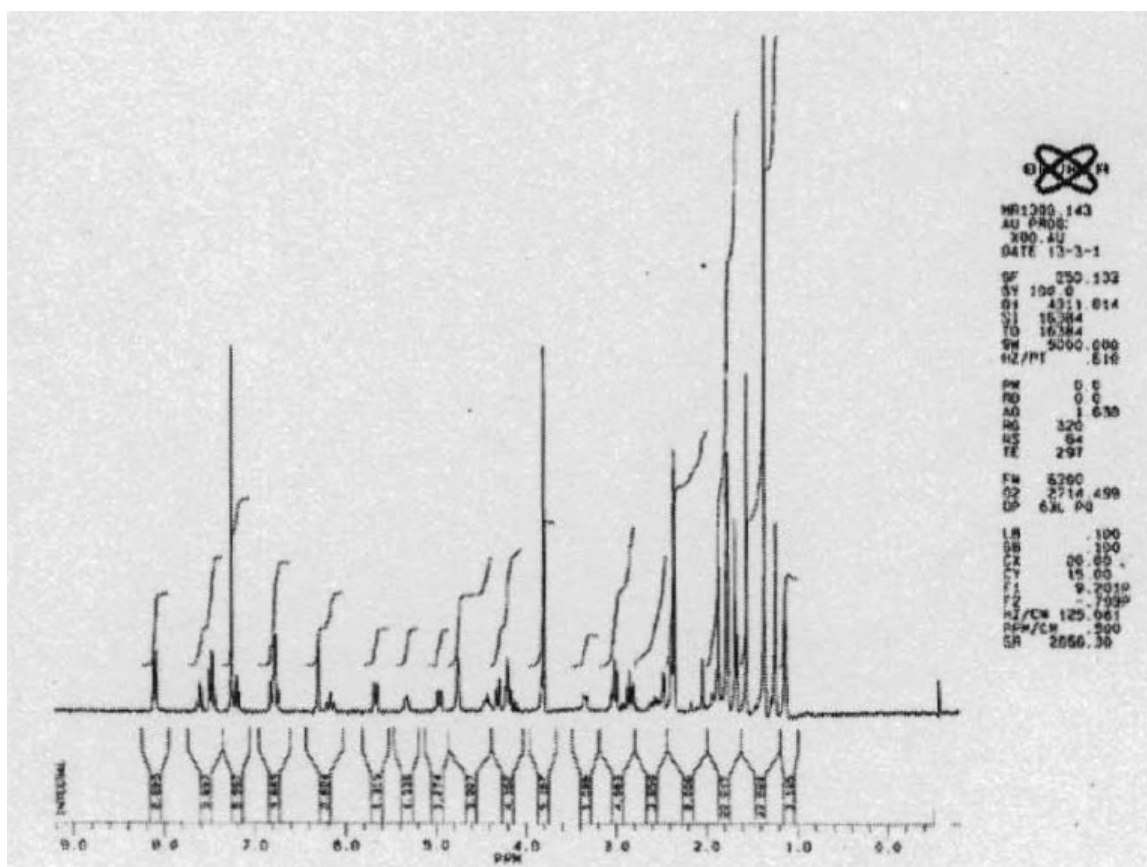

$^{13}\text{C}$  NMR Spectrum of **6n**

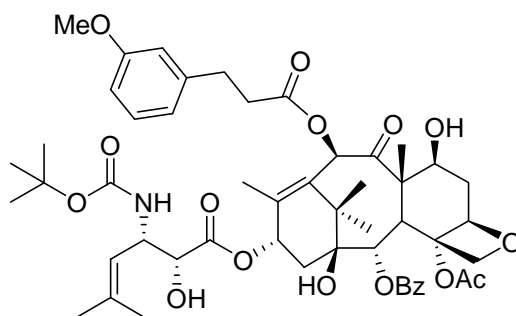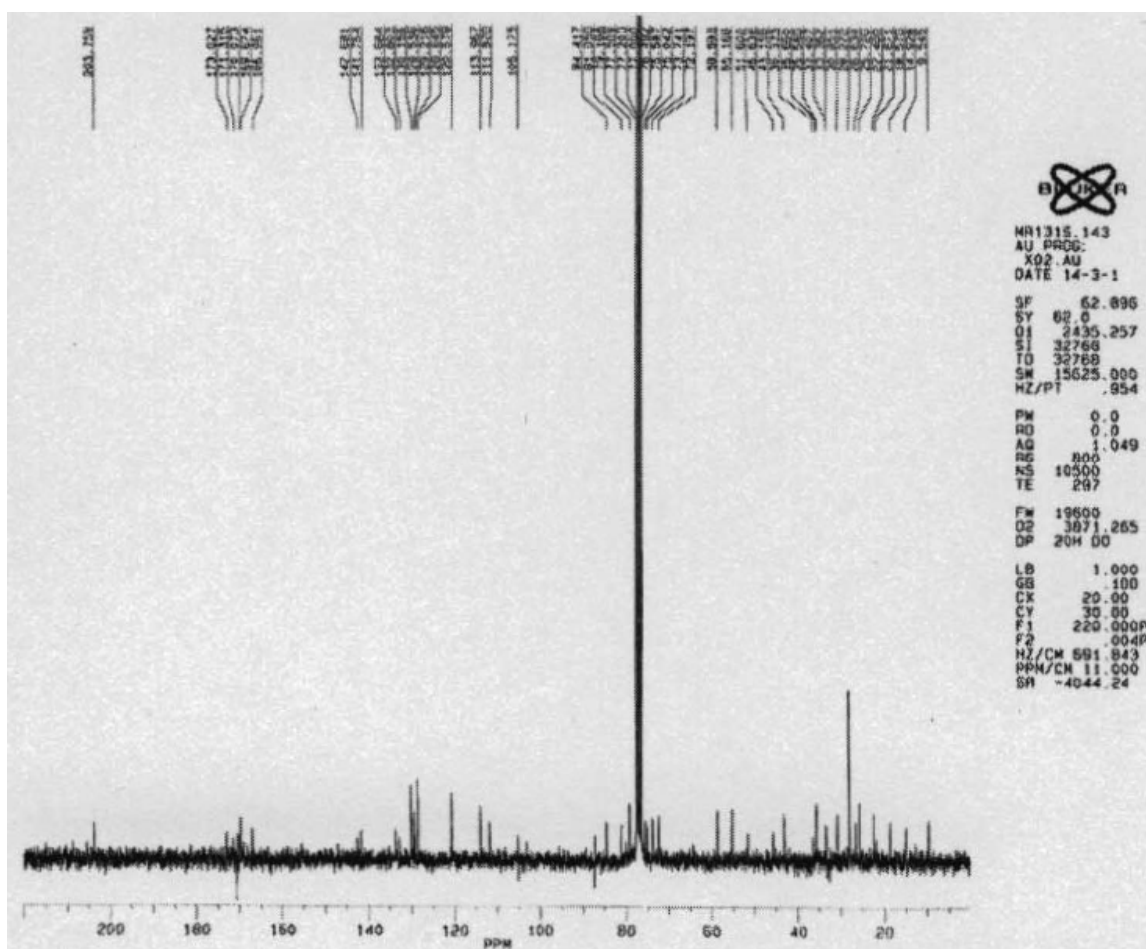

<sup>1</sup>H NMR Spectrum of **60**

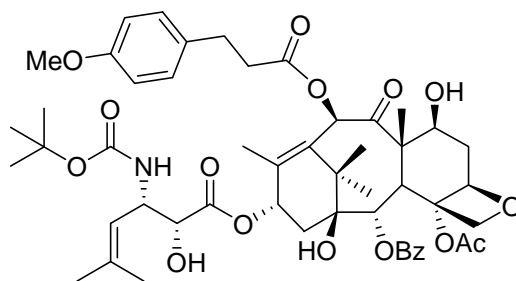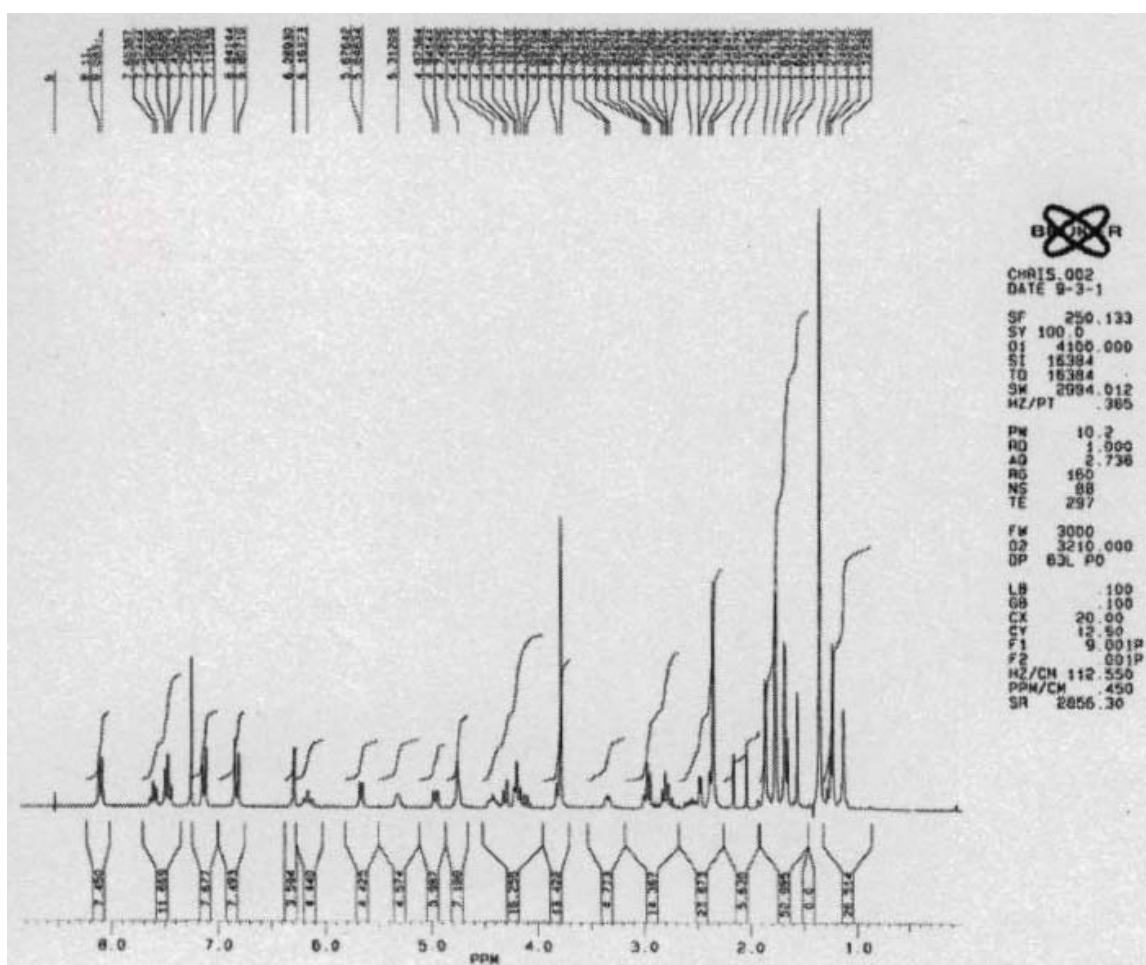

$^{13}\text{C}$  NMR Spectrum of **60**

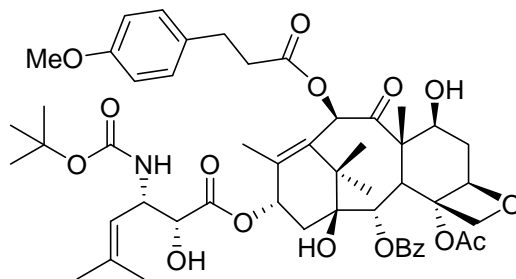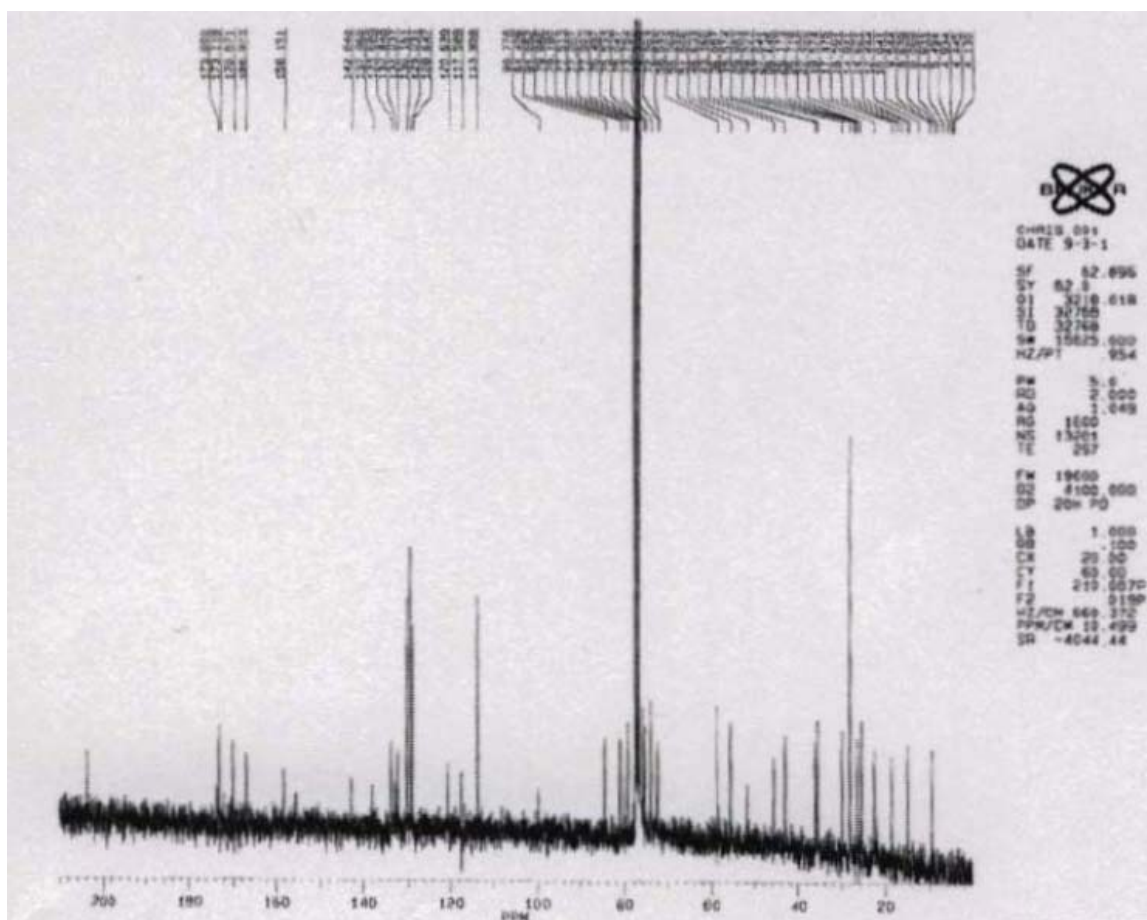

$^1\text{H}$  NMR Spectrum of **14a**

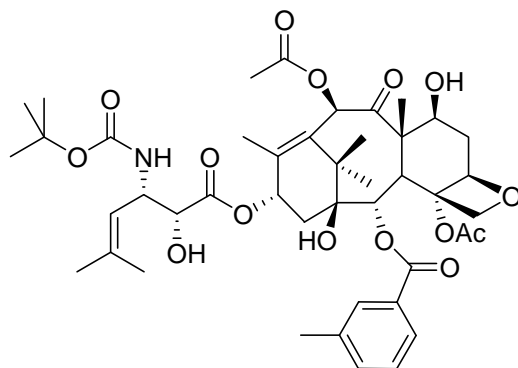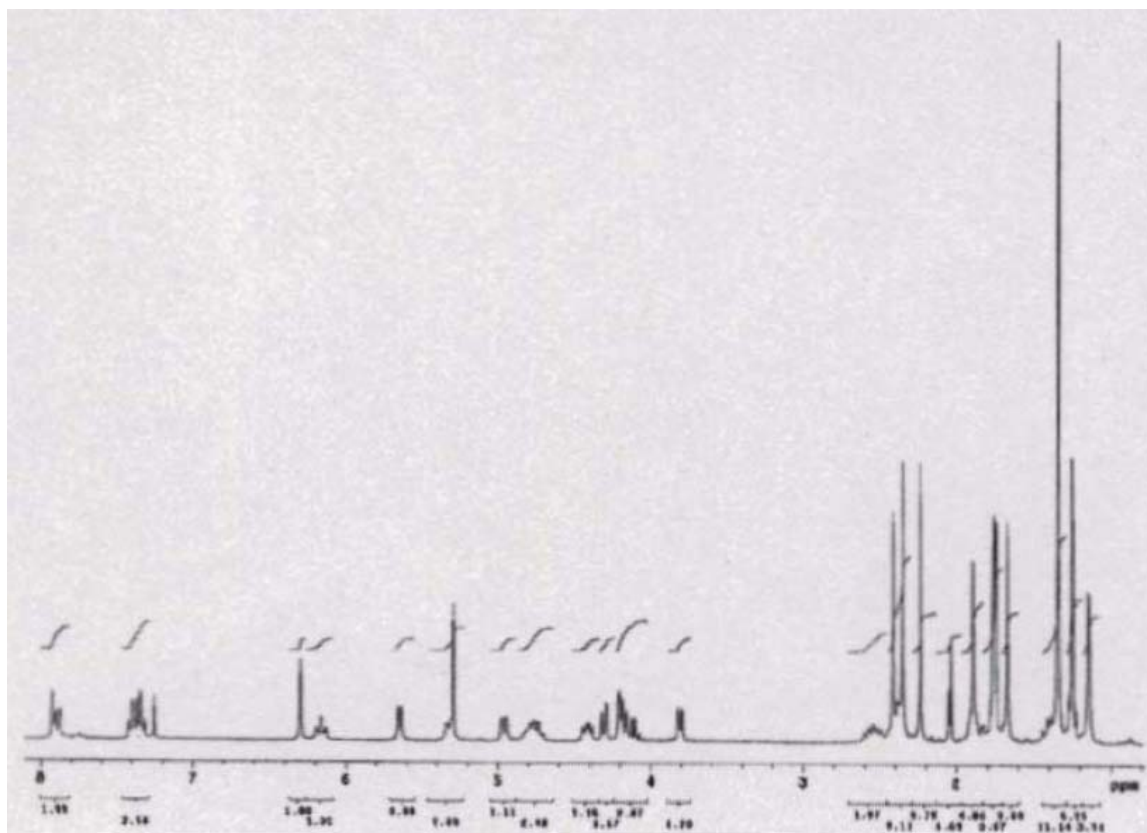



# <sup>13</sup>C NMR Spectrum of 14a

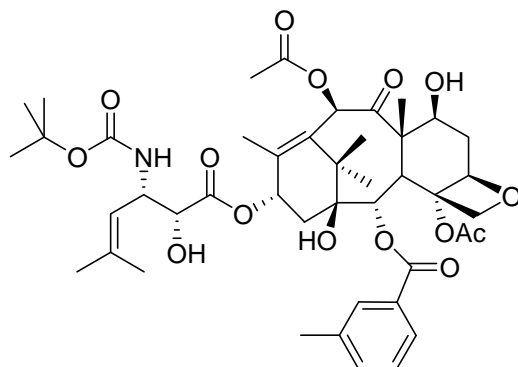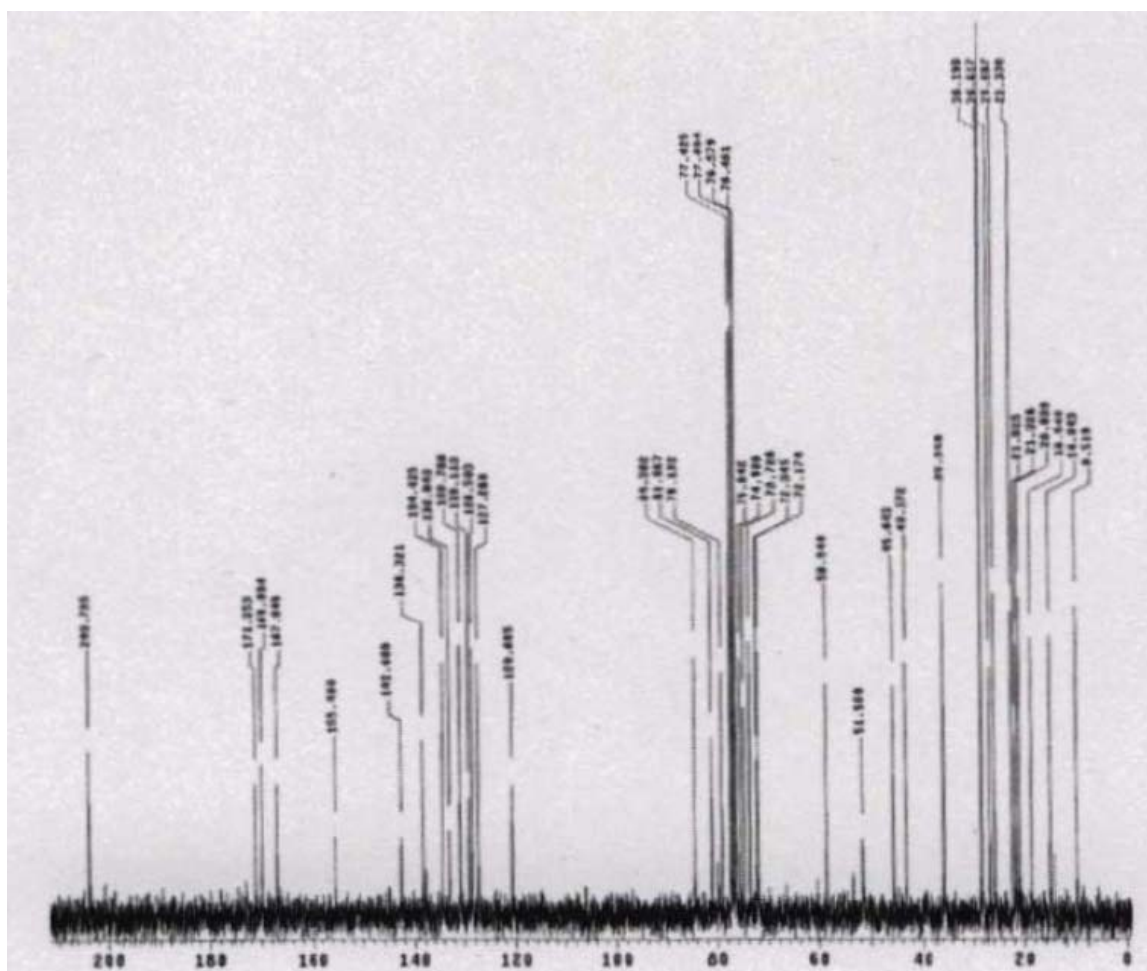

# <sup>1</sup>H NMR Spectrum of 14c

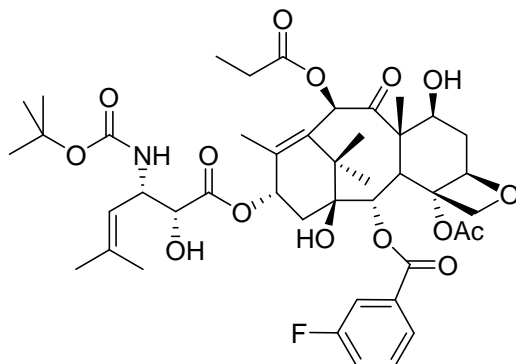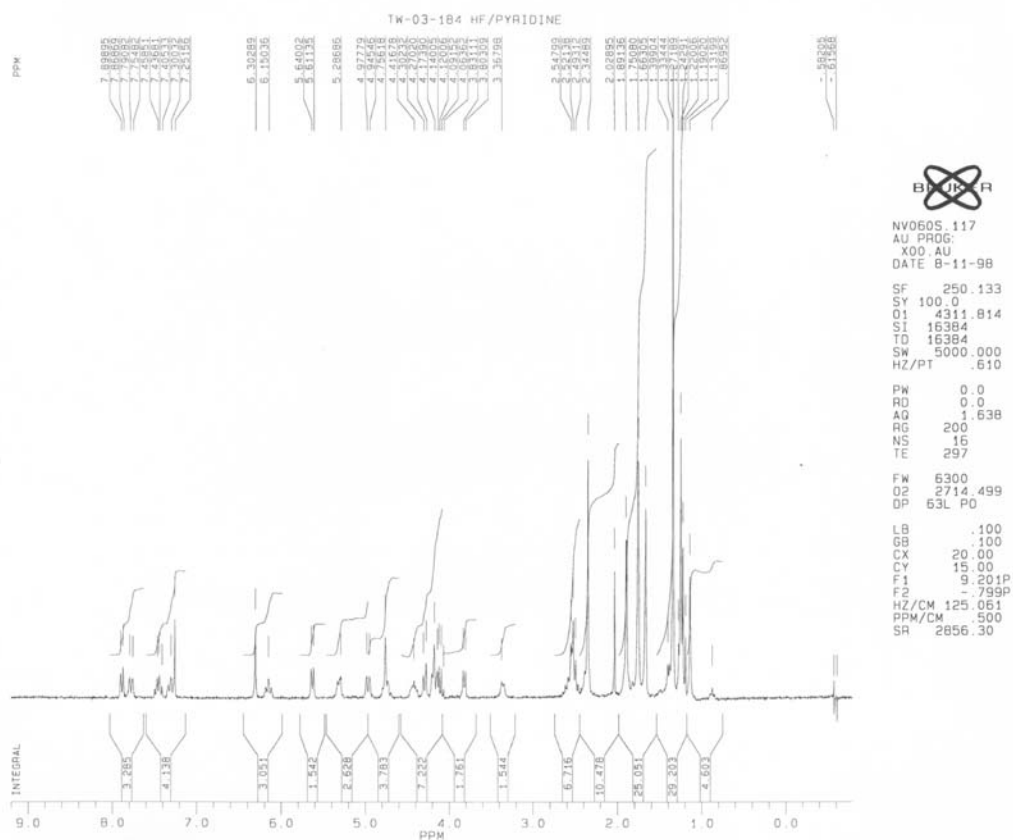

<sup>13</sup>C NMR Spectrum of 14c

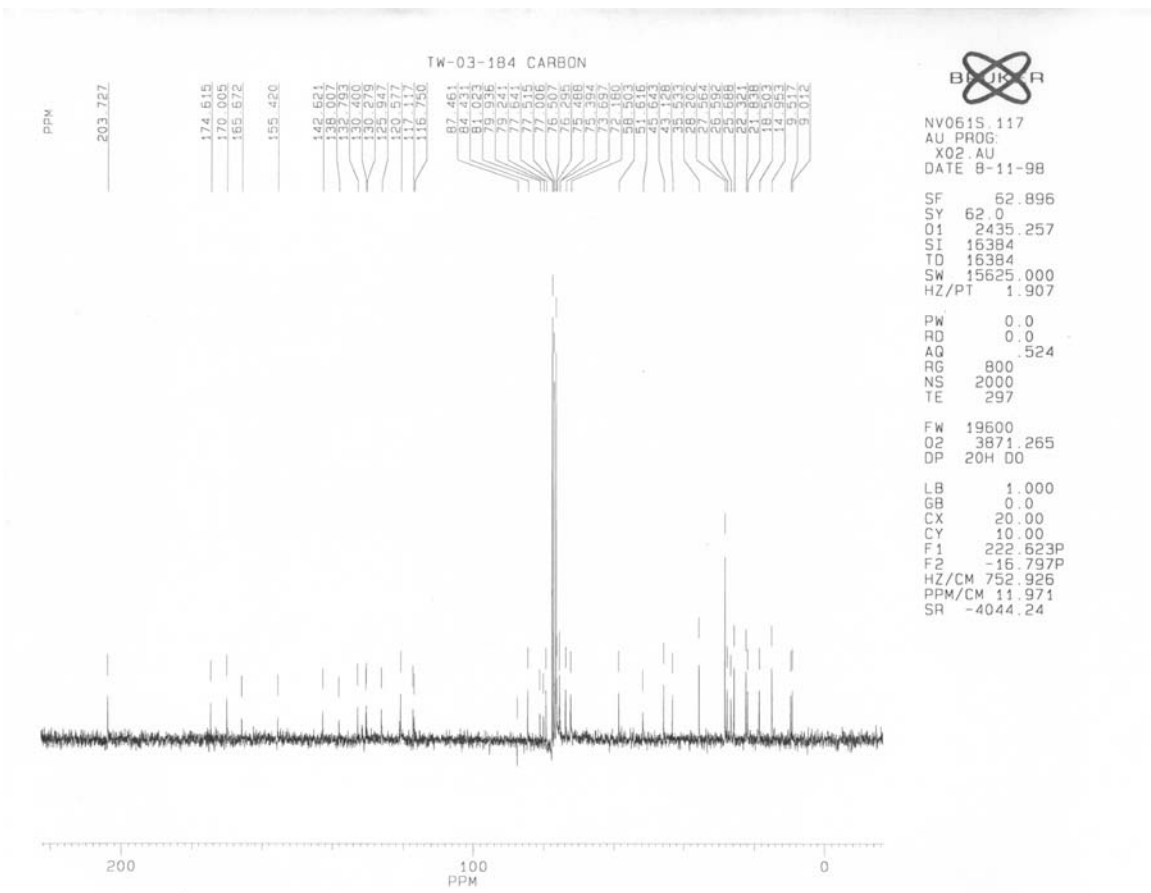

# $^{19}\text{F}$ NMR Spectrum of **14c**

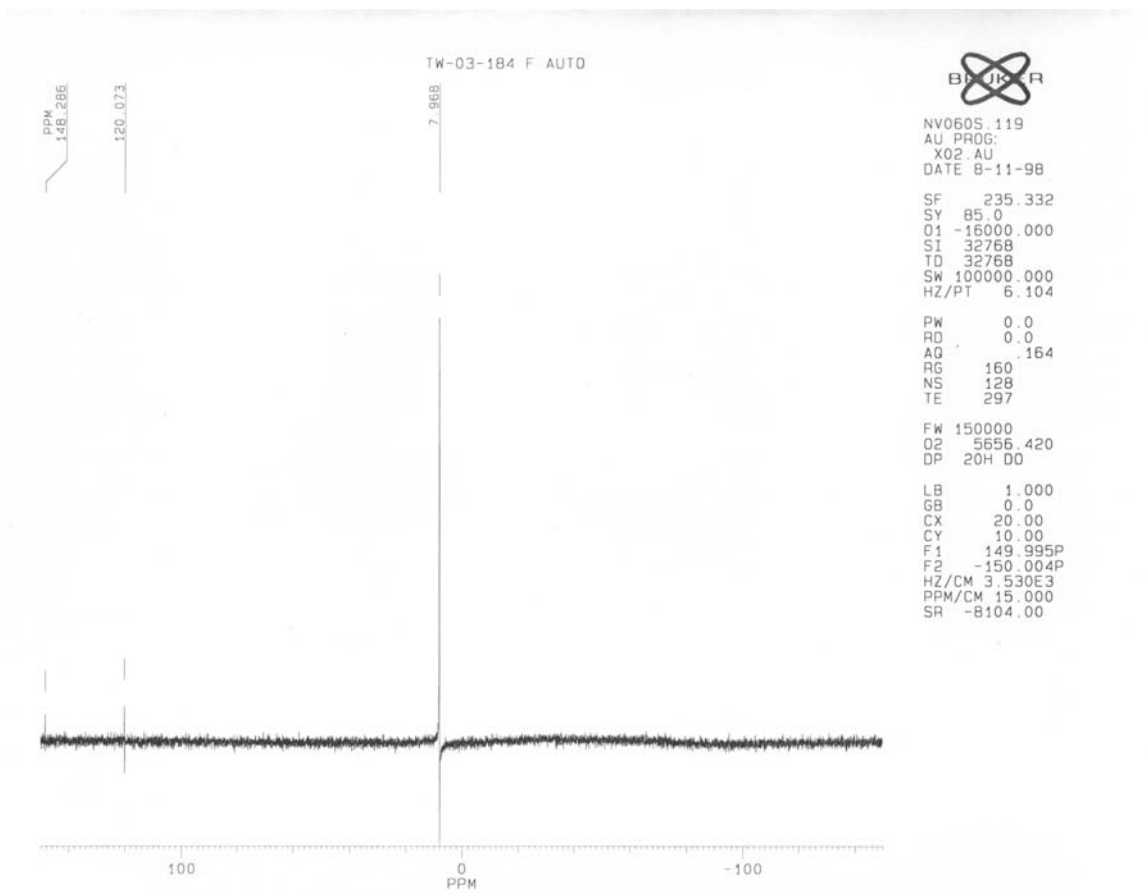

# <sup>1</sup>H NMR Spectrum of 14d

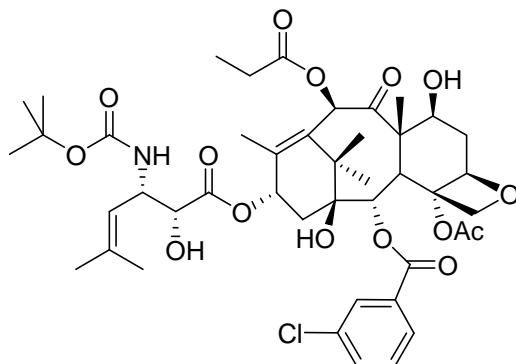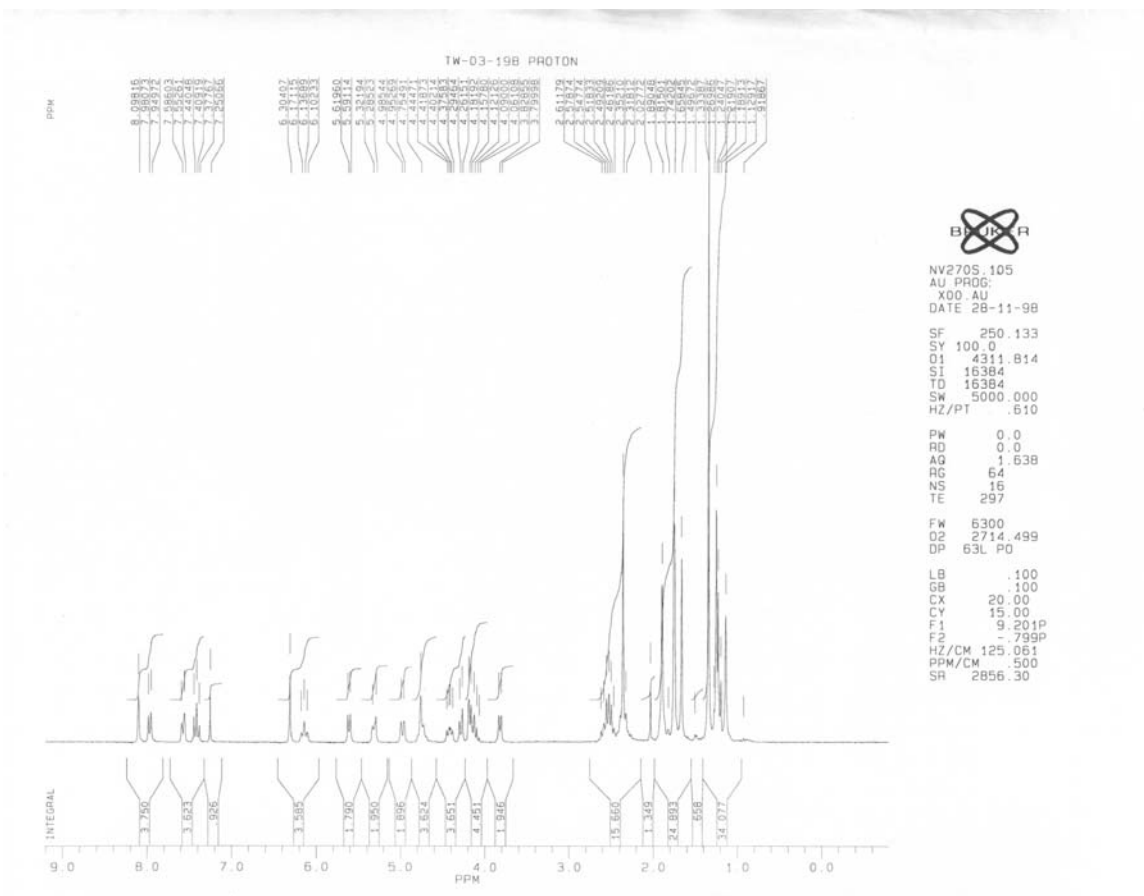

<sup>13</sup>C NMR Spectrum of **14d**

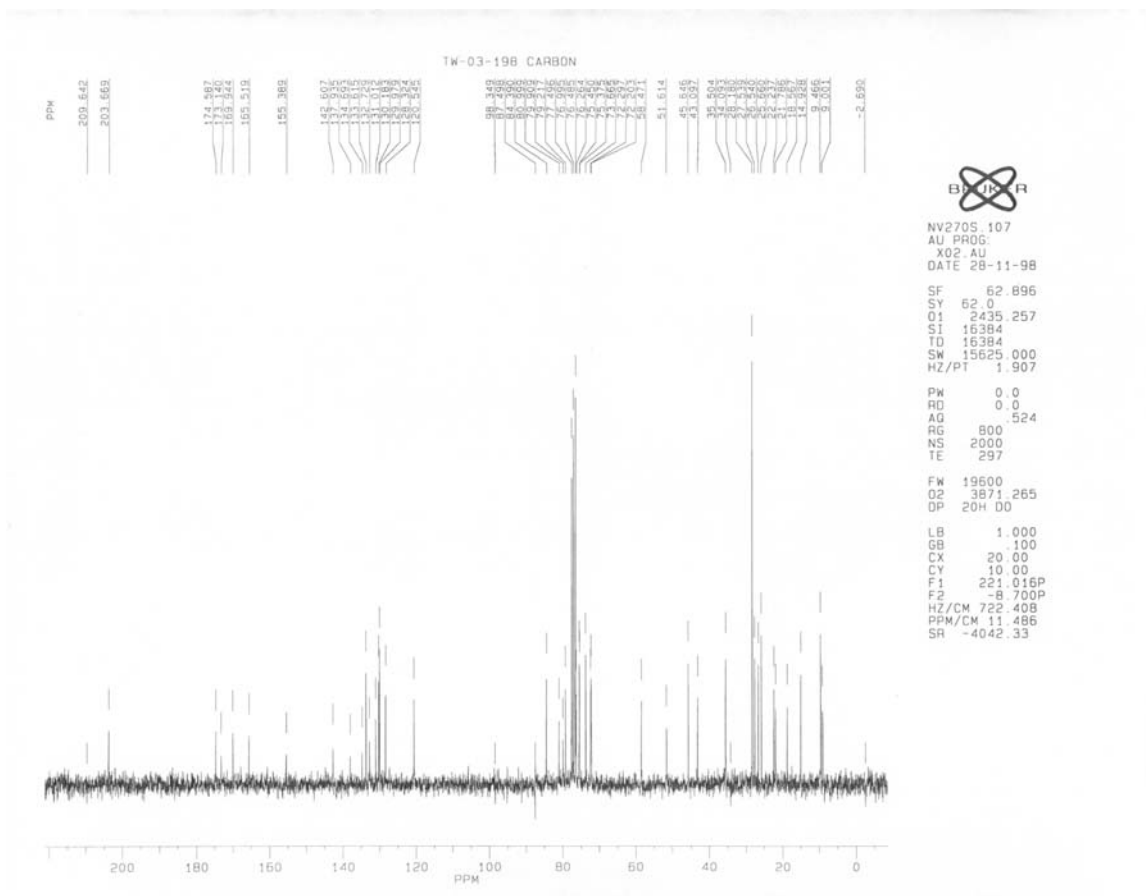

# <sup>1</sup>H NMR Spectrum of 14e

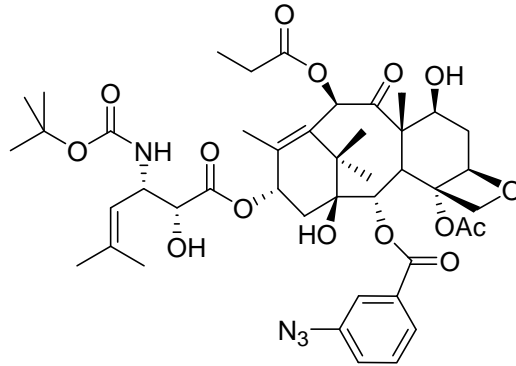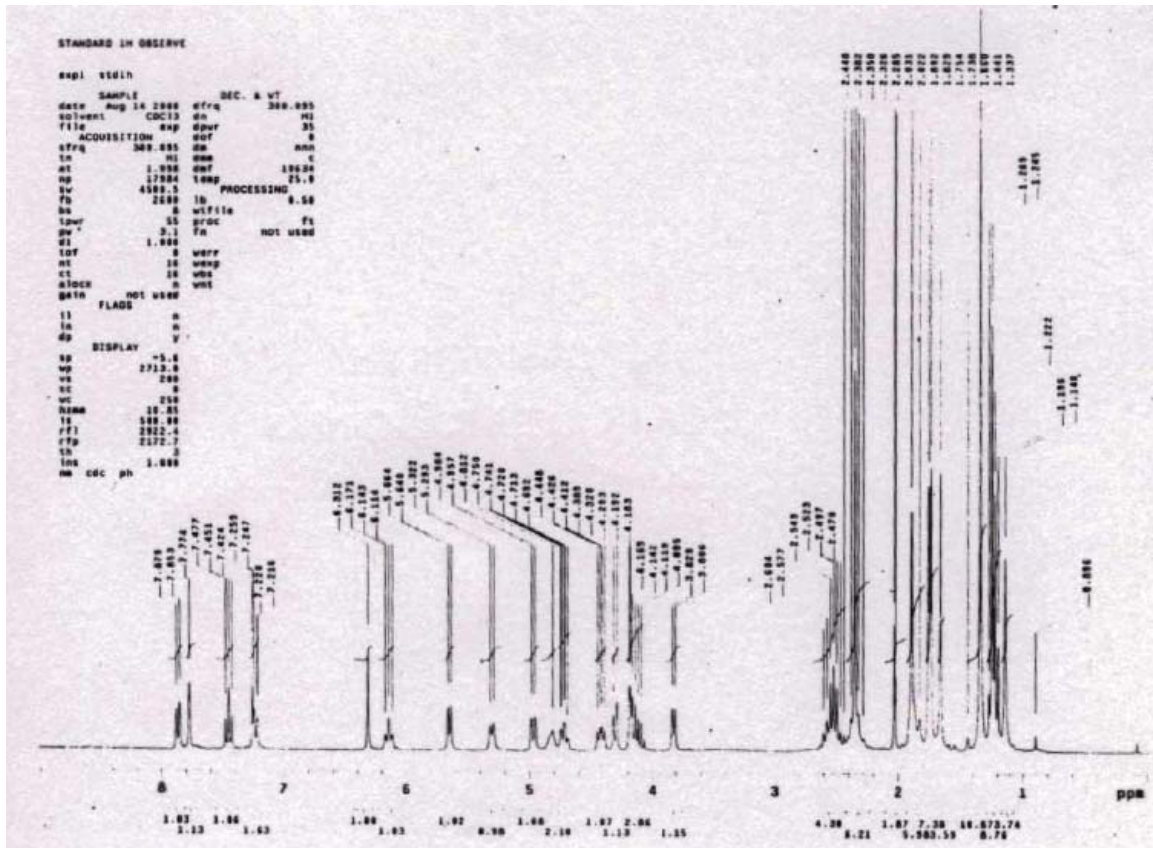

# $^1\text{H}$ NMR Spectrum of **14f**

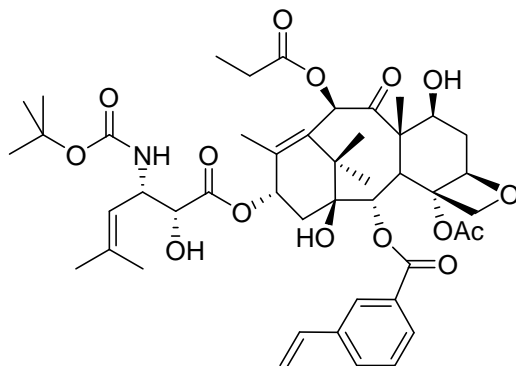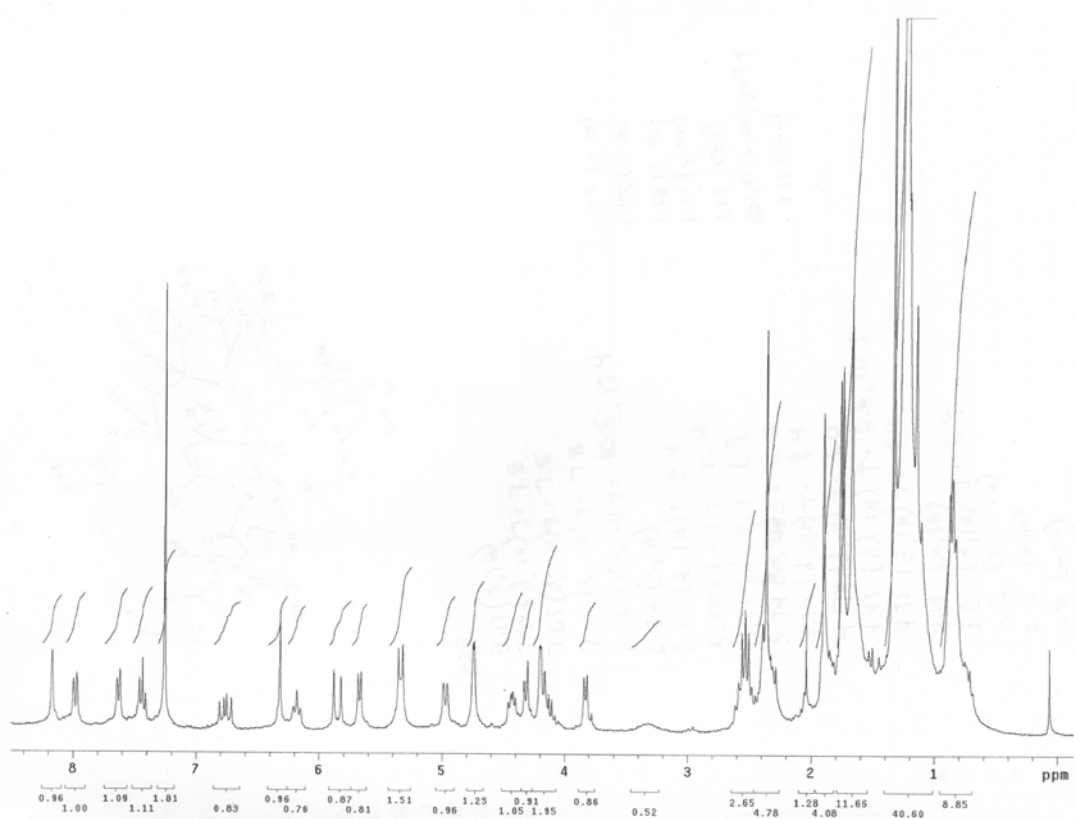



# $^1\text{H}$ NMR Spectrum of **14g**

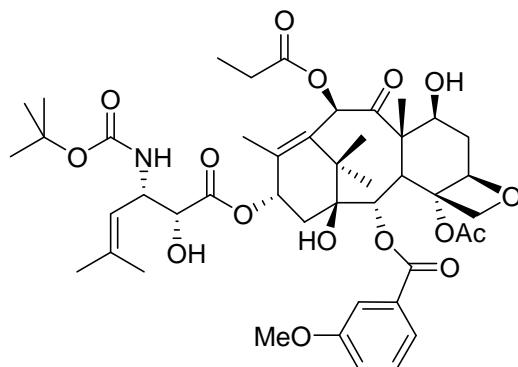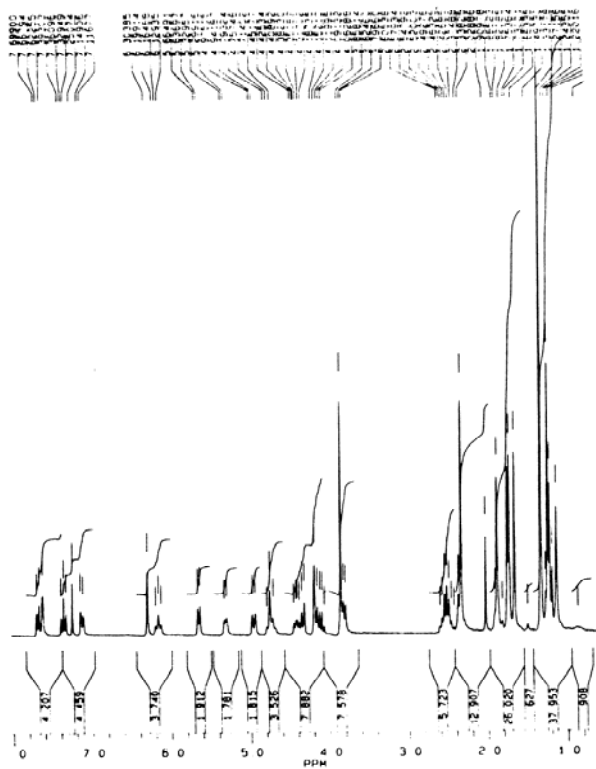

<sup>1</sup>H NMR Spectrum of **14h**

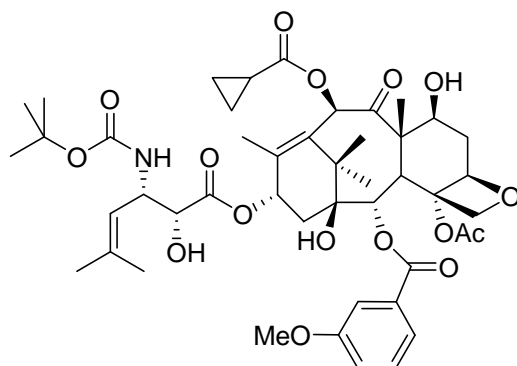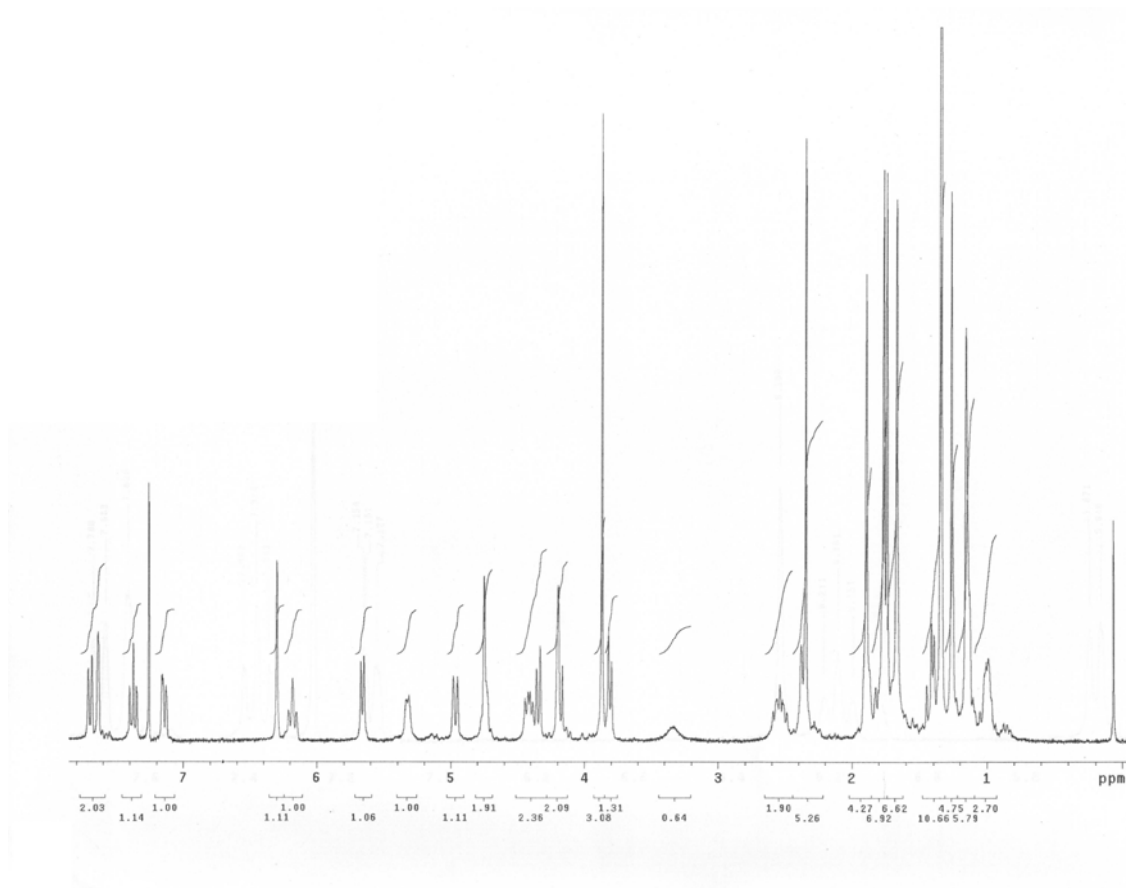

# <sup>1</sup>H NMR Spectrum of 14h

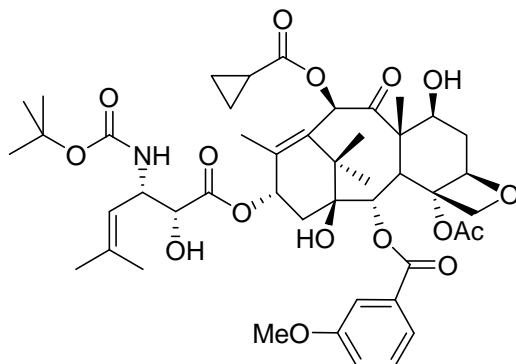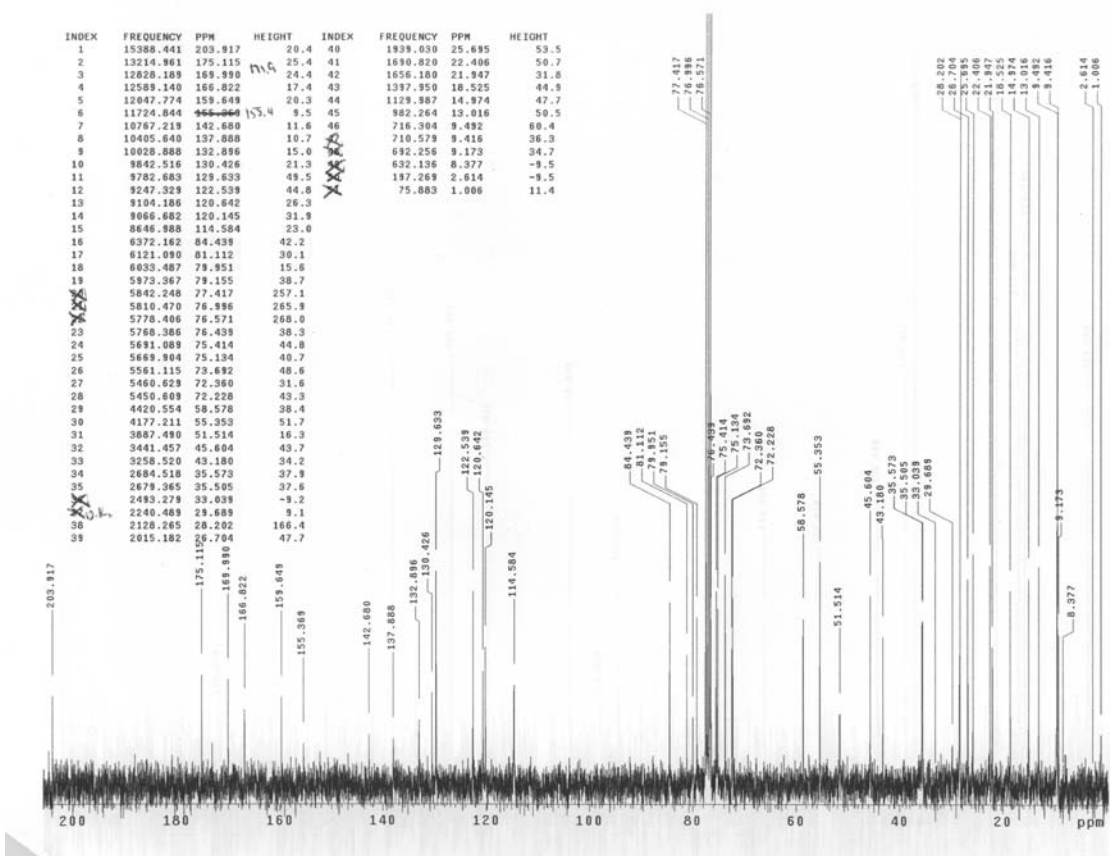

# $^1\text{H}$ NMR Spectrum of **14i**

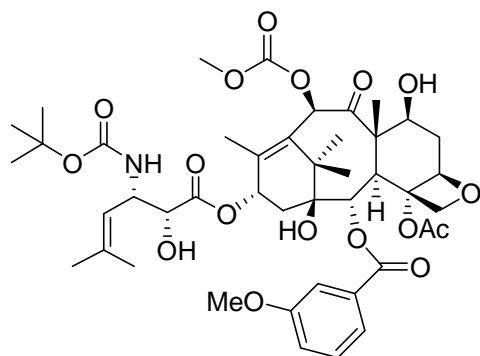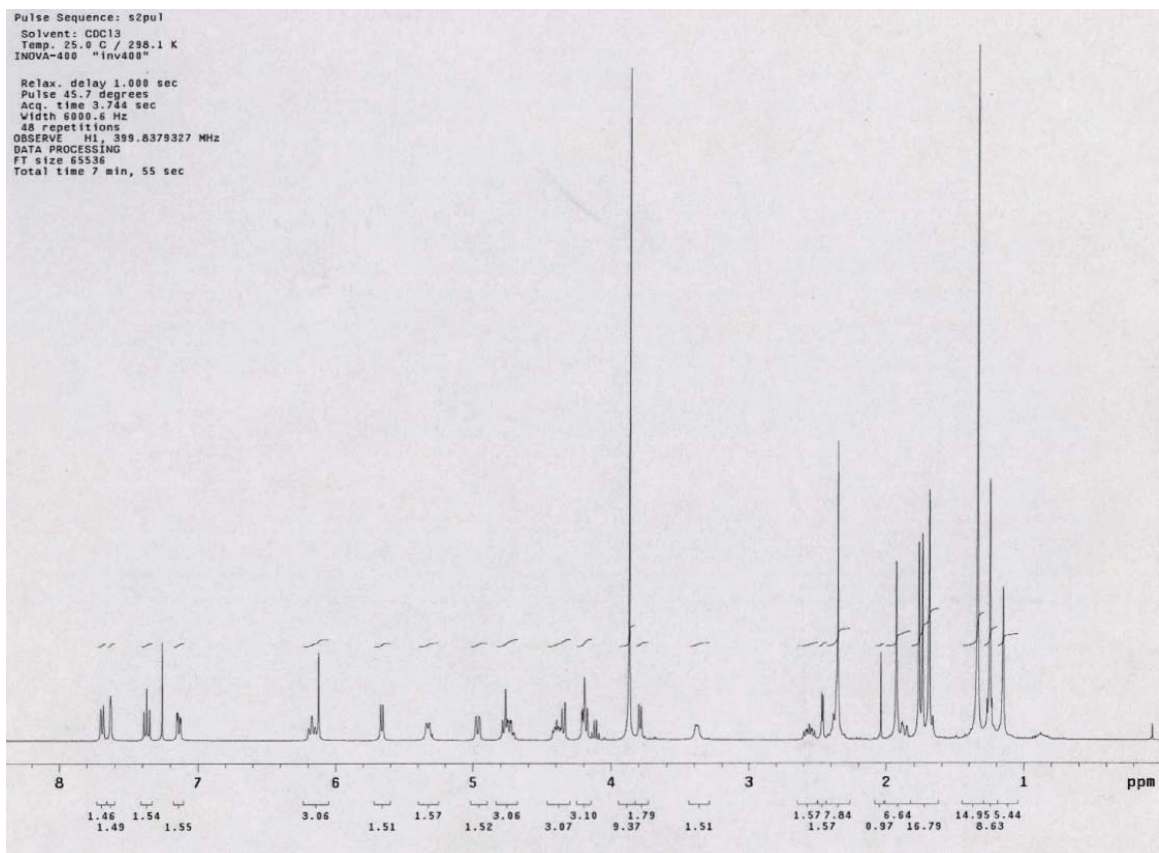

# <sup>13</sup>C NMR Spectrum of 14i

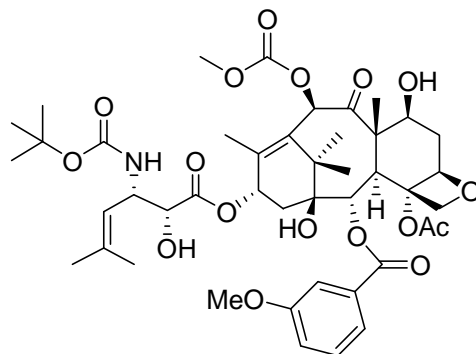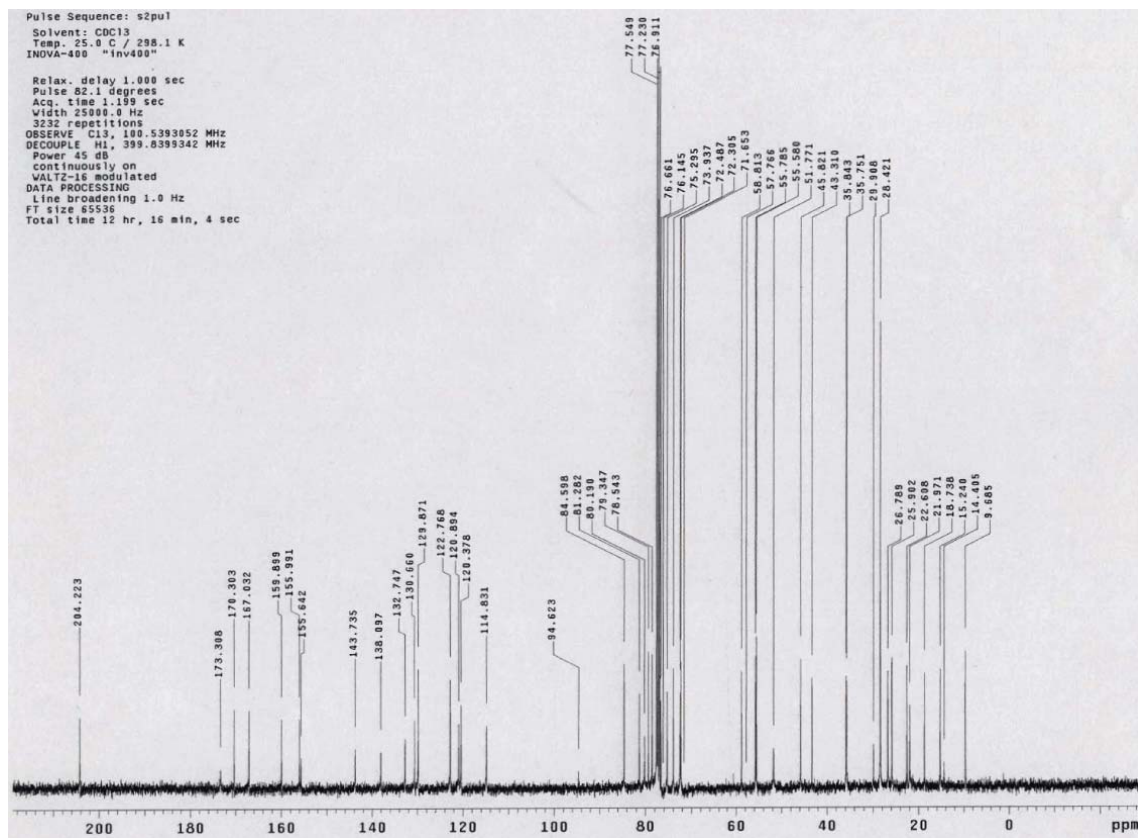

<sup>1</sup>H NMR Spectrum of **14j**

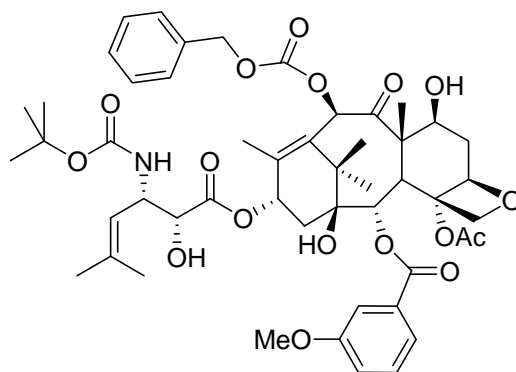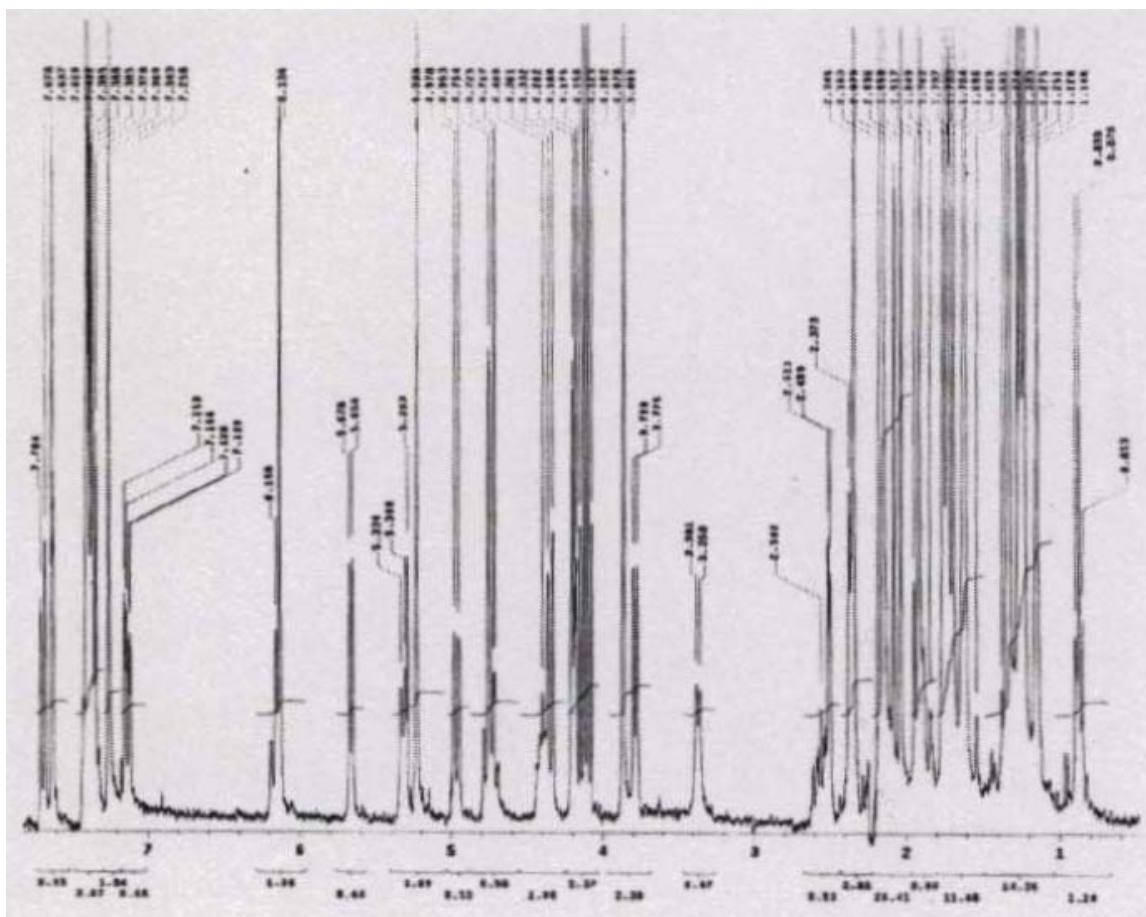

$^1\text{H}$  NMR Spectrum of **14k**

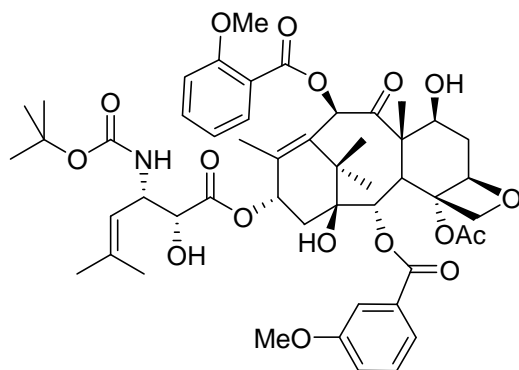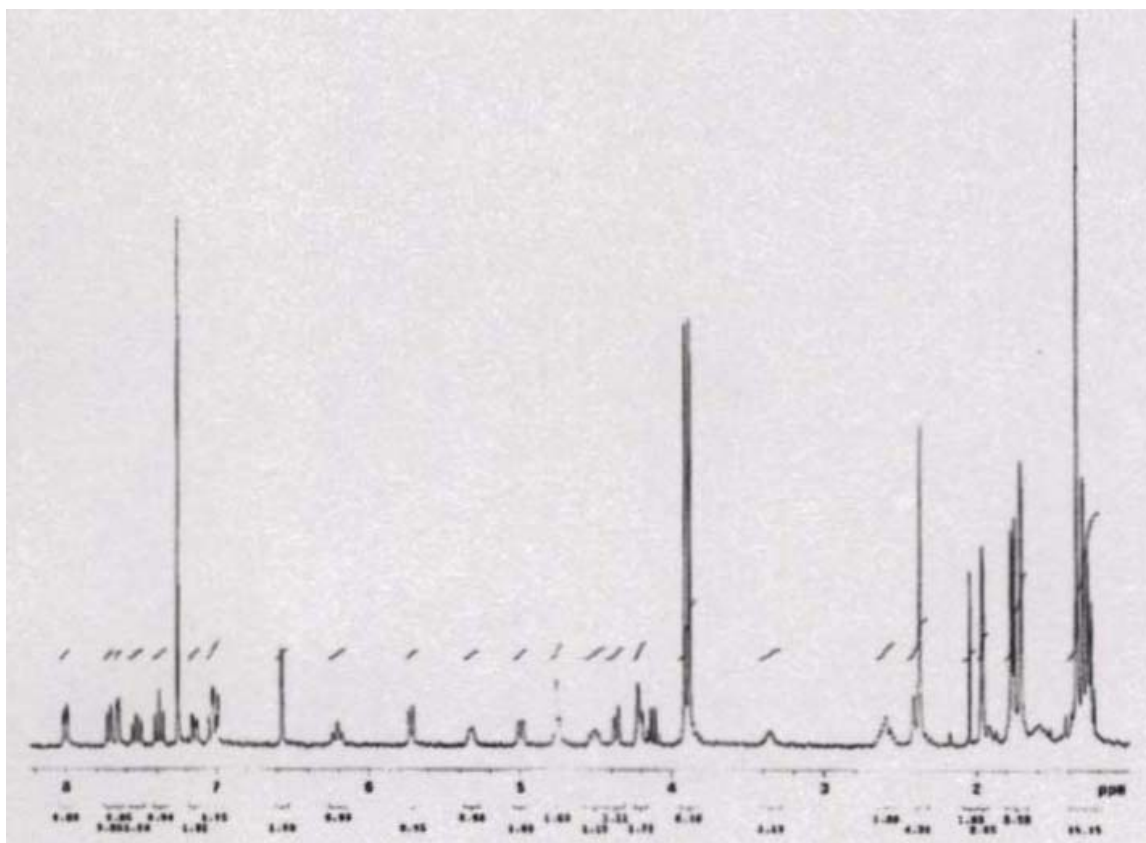

$^{13}\text{C}$  NMR Spectrum of **14k**

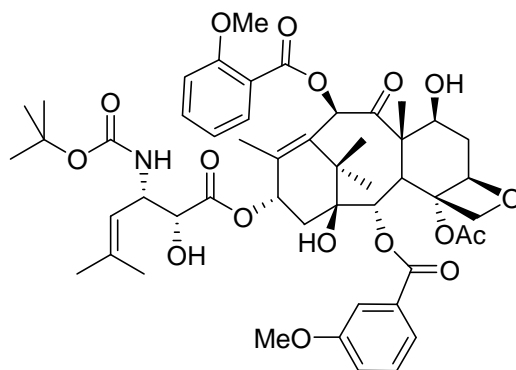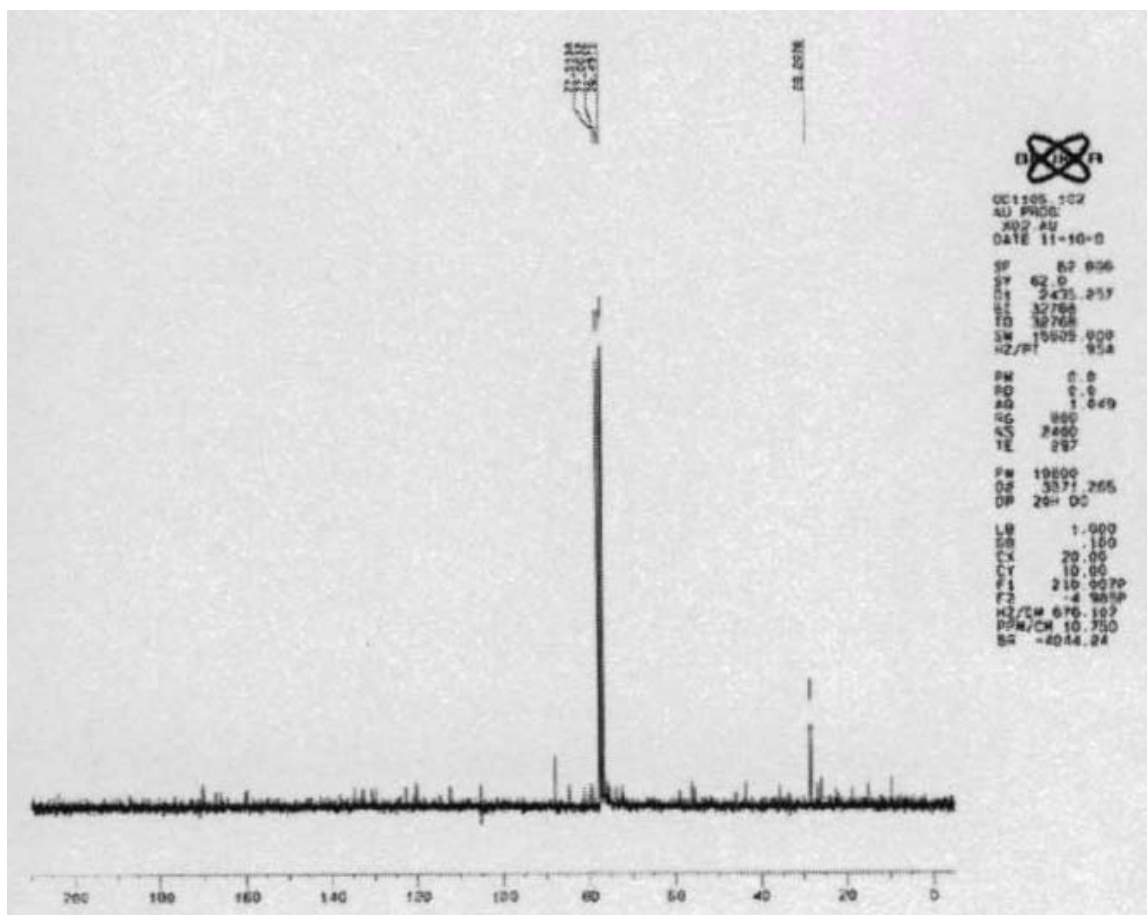



# $^1\text{H}$ NMR Spectrum of **14l**

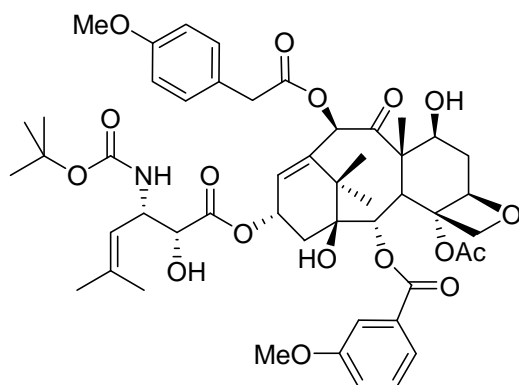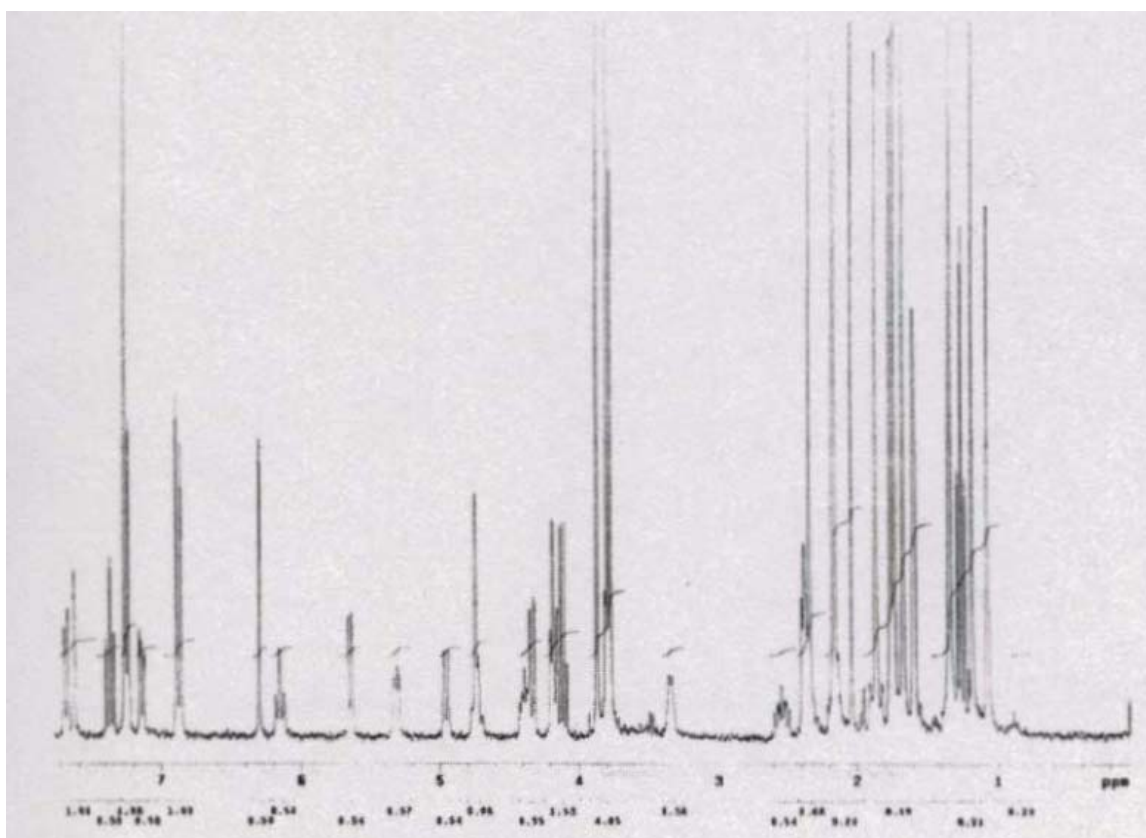

# $^{13}\text{C}$ NMR Spectrum of **14l**

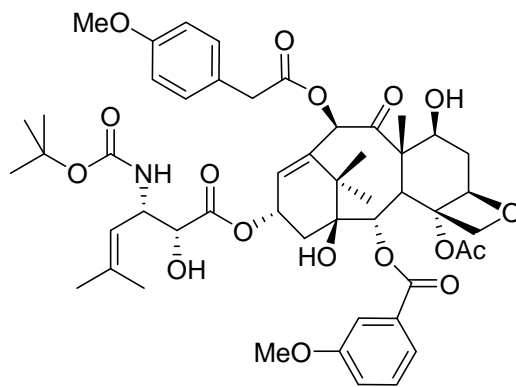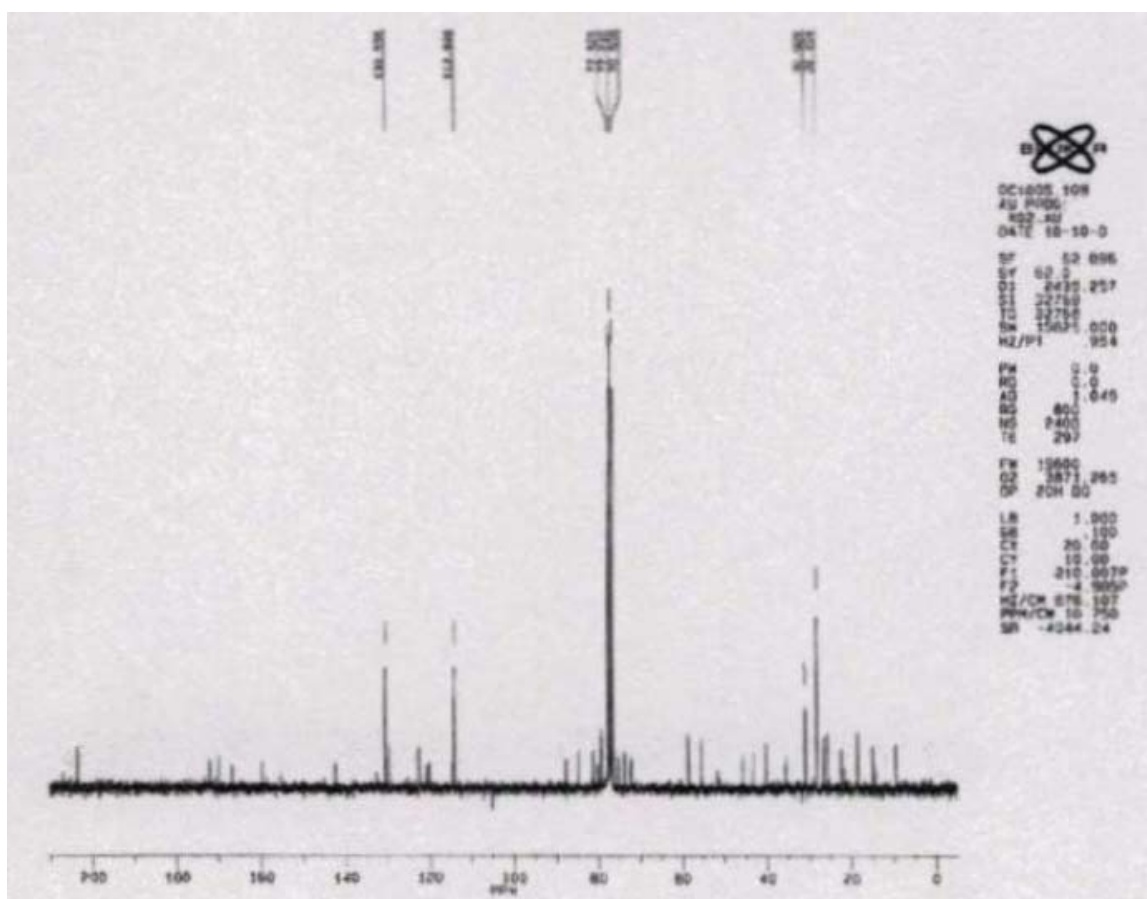

$^1\text{H}$  NMR Spectrum of **14m**

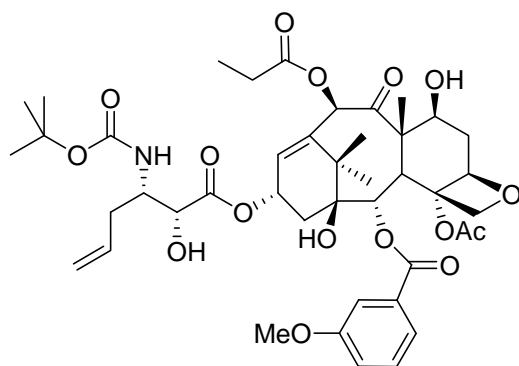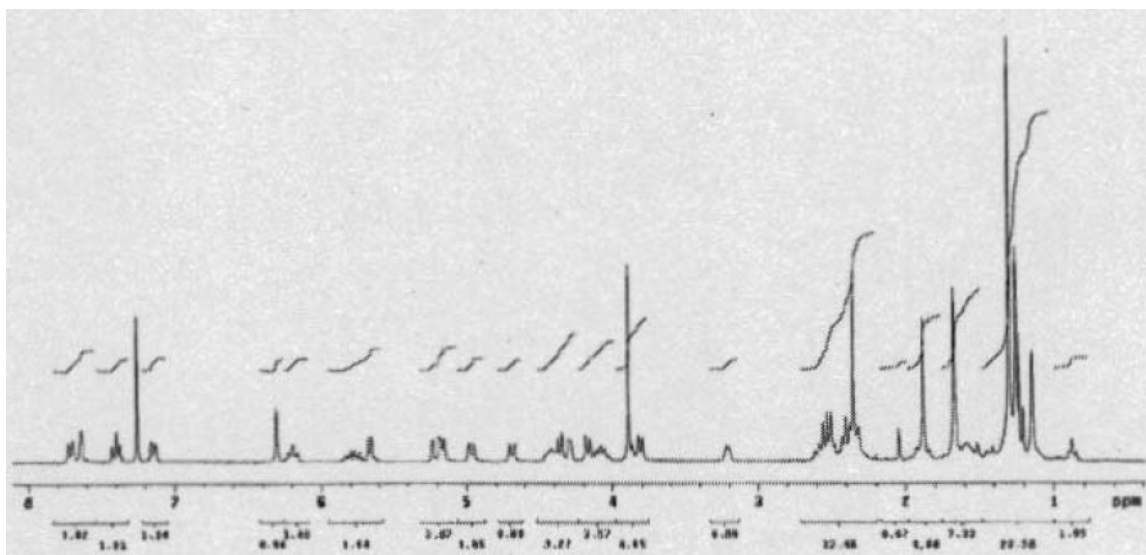

$^{13}\text{C}$  NMR Spectrum of **14m**

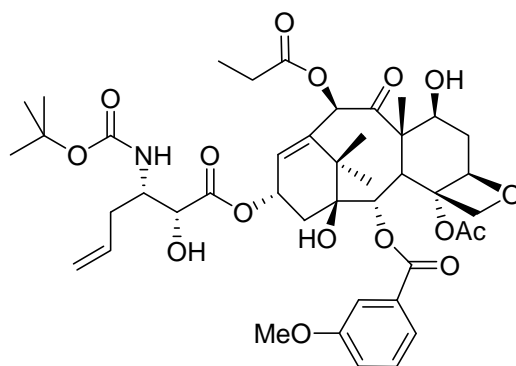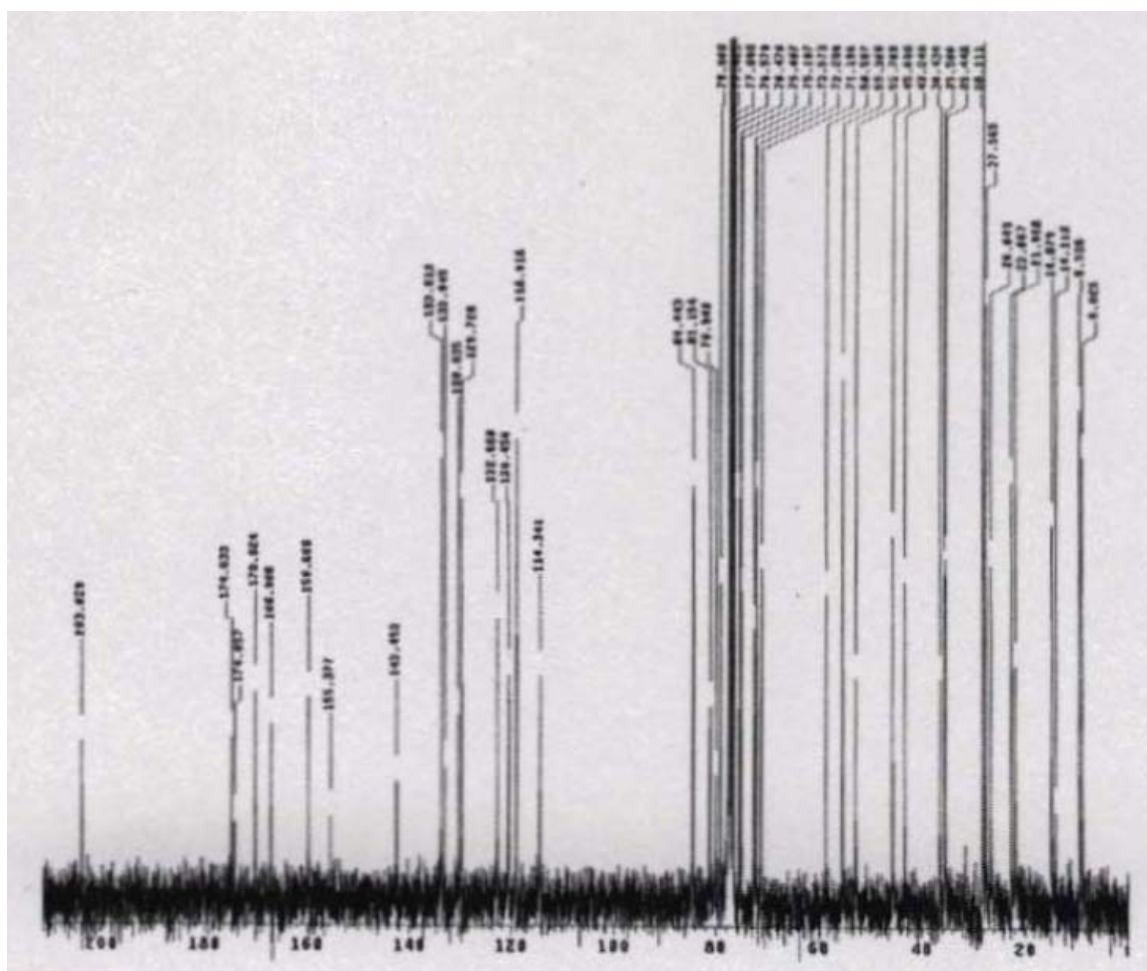

<sup>1</sup>H NMR Spectrum NMR of **14n**

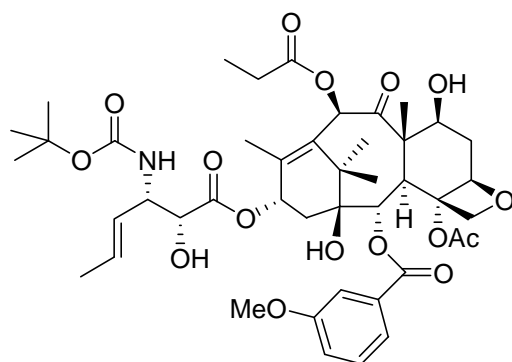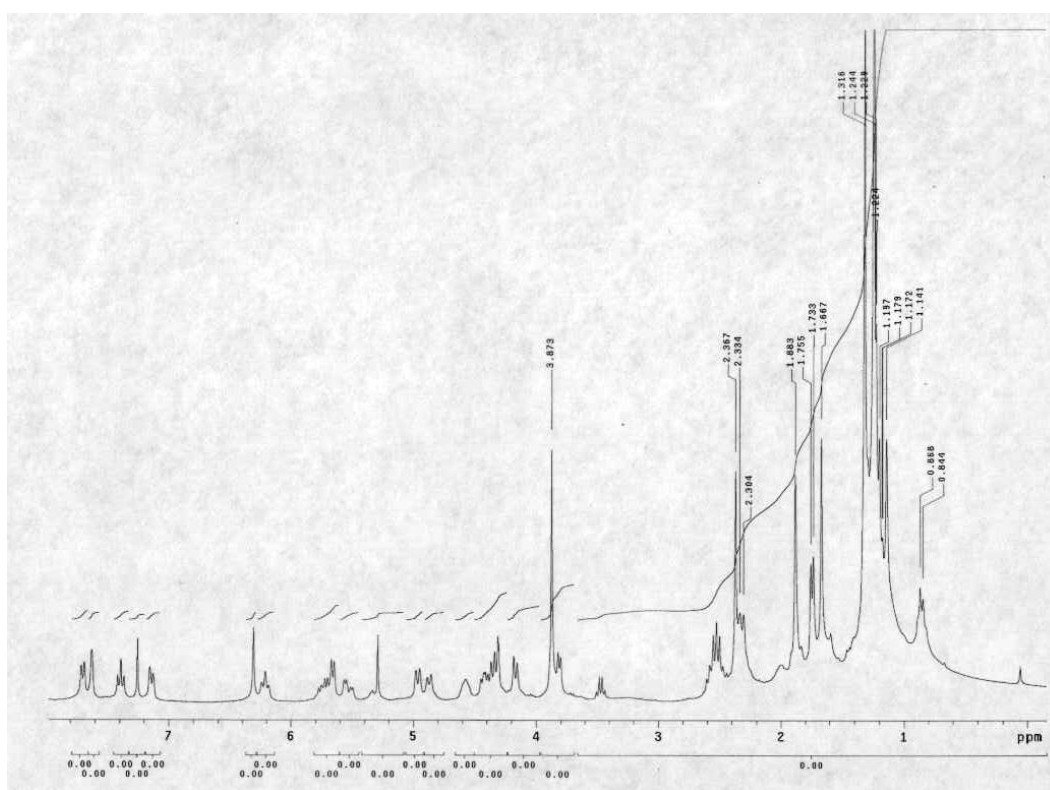

# <sup>13</sup>C NMR Spectrum of 14n

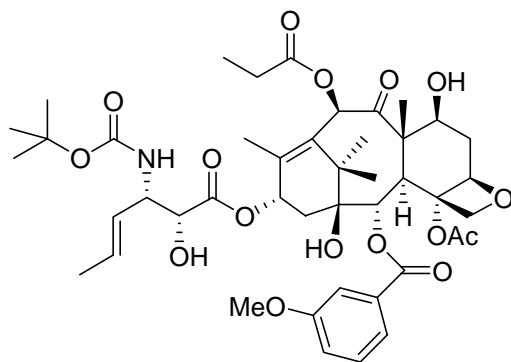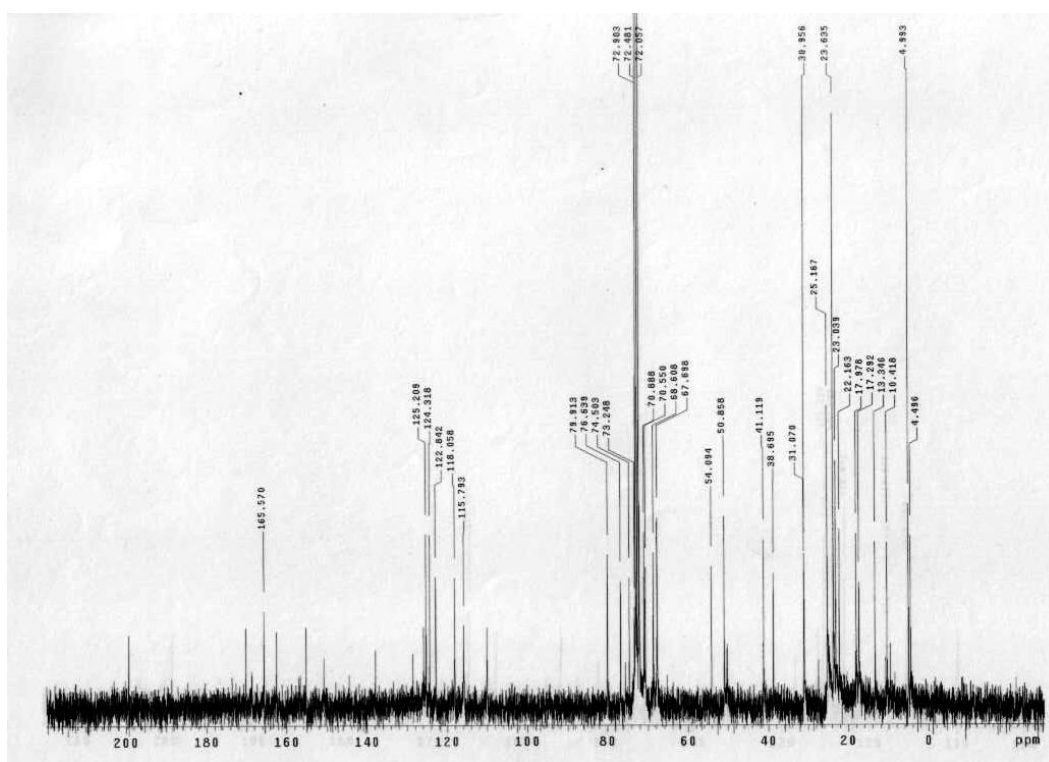

<sup>1</sup>H NMR Spectrum of **14o**

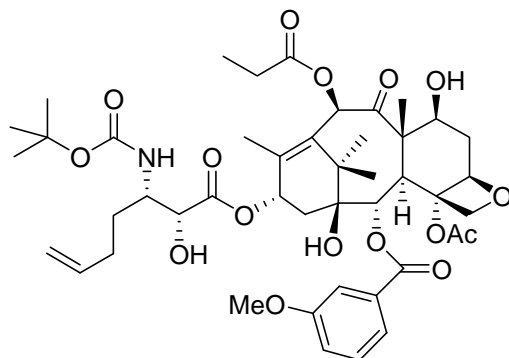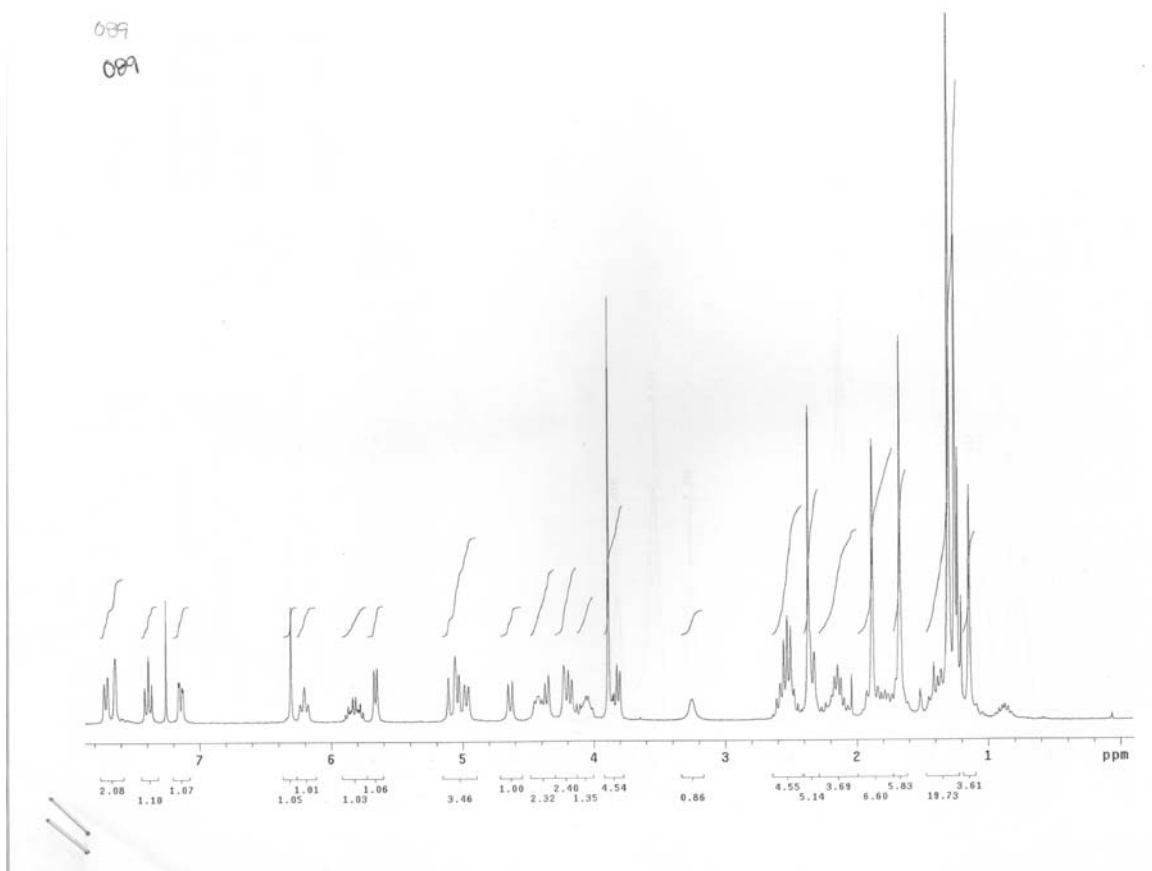

# <sup>1</sup>H NMR Spectrum of **14o**

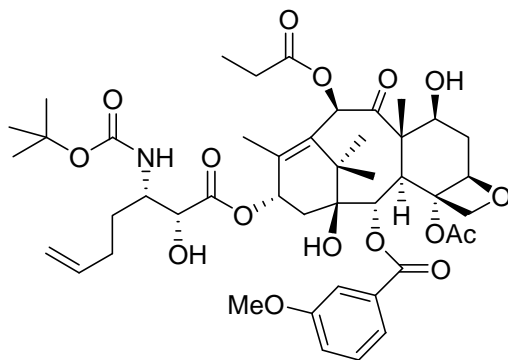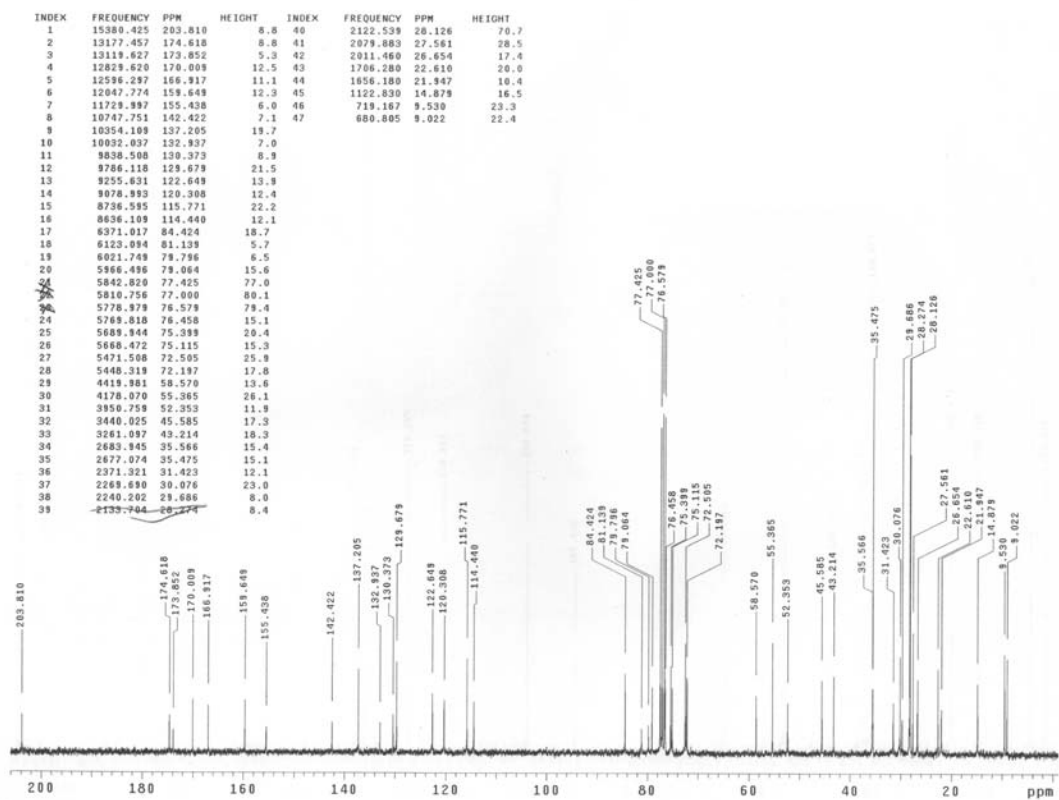



<sup>1</sup>H NMR Spectrum of **14p**

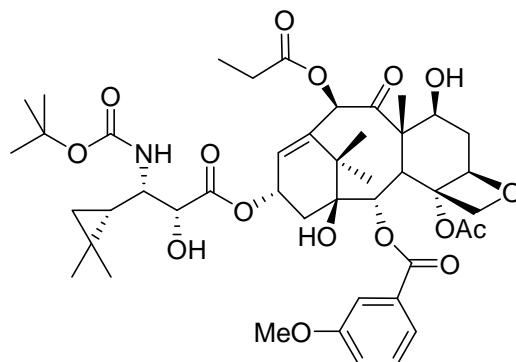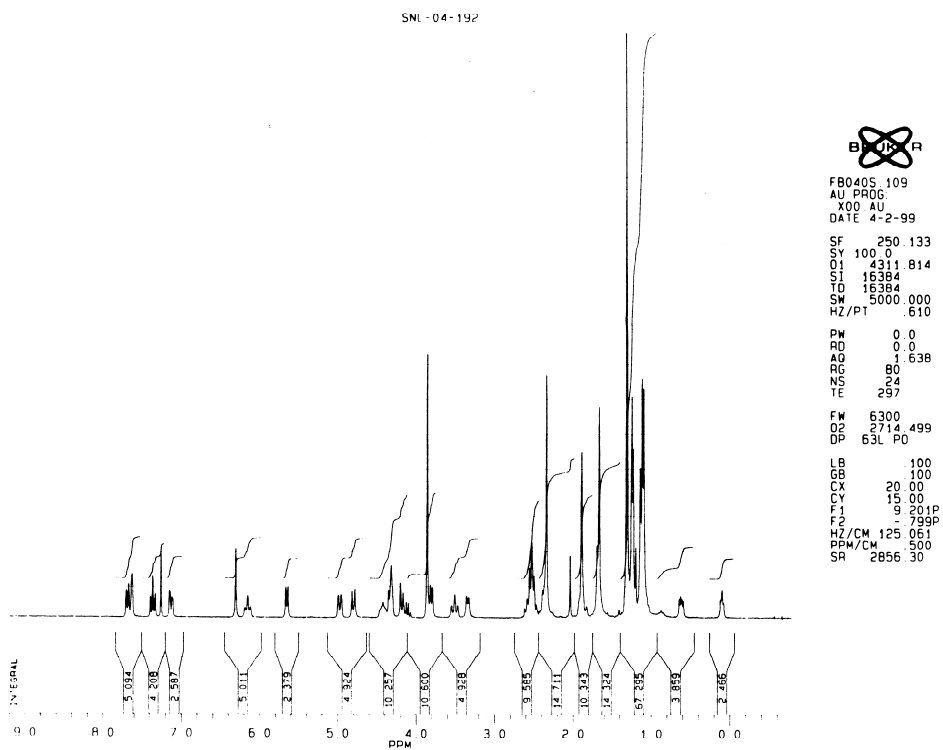

<sup>13</sup>C NMR Spectrum of **14p**

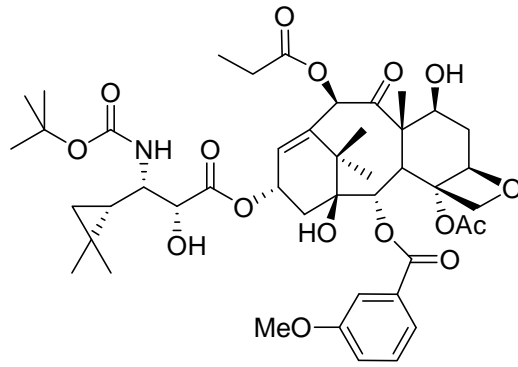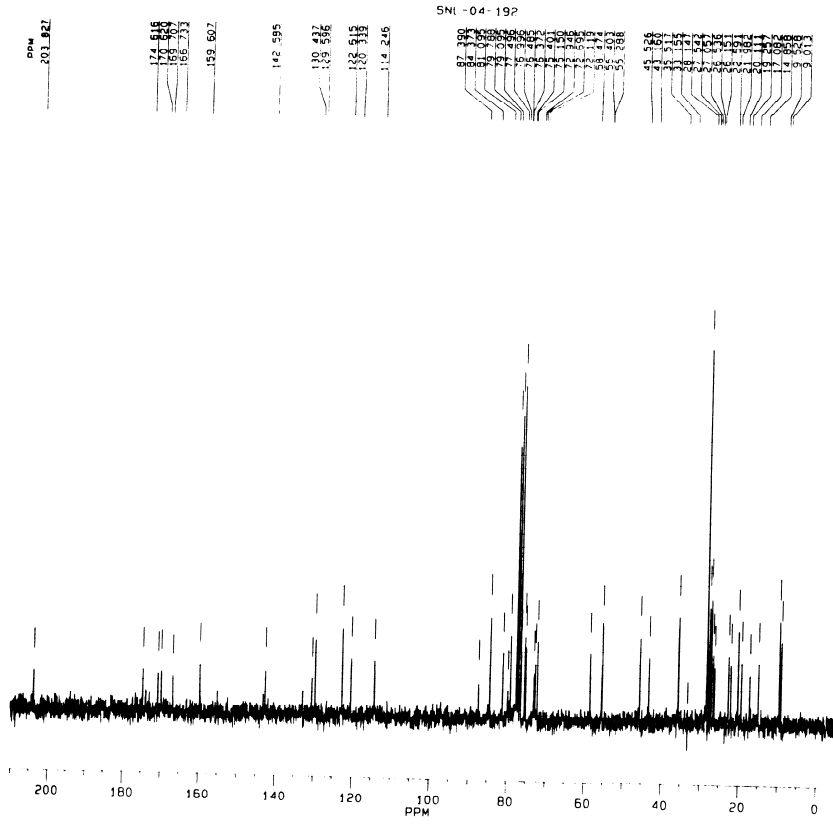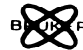

FB0415 109  
AU PROG  
X02 AU  
DATE 4-2-99

SF 62 896  
SV 62 0  
O1 2435 257  
S1 16384  
T0 16384  
SW 15625 000  
HZ/P1 1.907

PW 0 0  
RD 0 0  
AQ 524  
RG 800  
NS 2000  
TE 297

FW 19600  
O2 3871 265  
DP 20H 00

LB 1.000  
GB 100  
CX 20 00  
CY 9 00  
F1 210.007P  
F2 -5.000P  
HZ/CM 676 155  
PPM/CM 10 750  
SR -4042.33

# <sup>1</sup>H NMR Spectrum of 15c

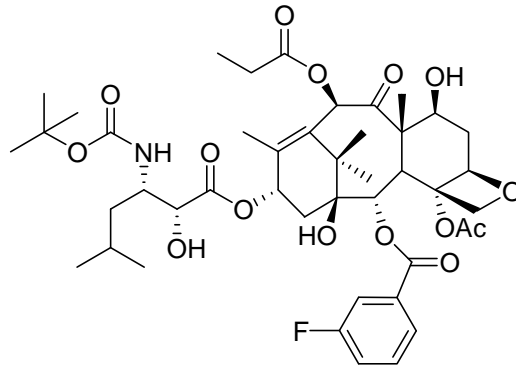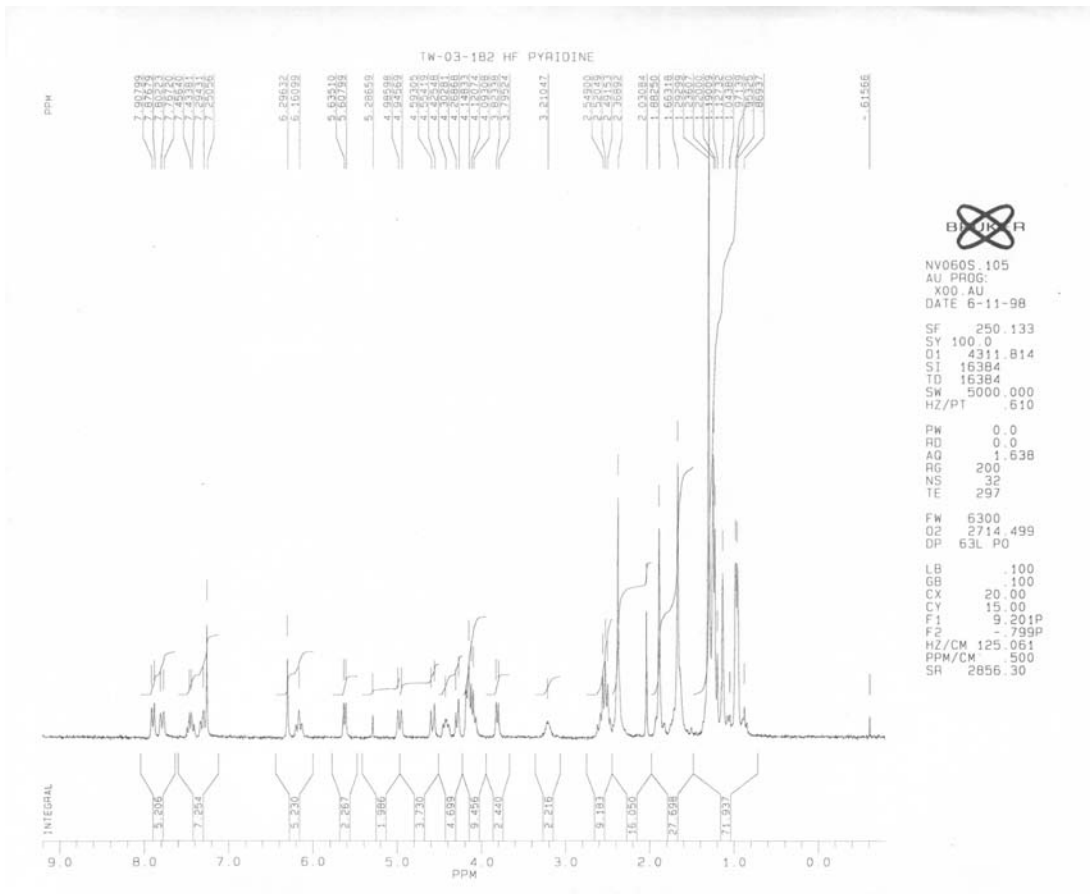

# <sup>13</sup>C NMR Spectrum of 15c

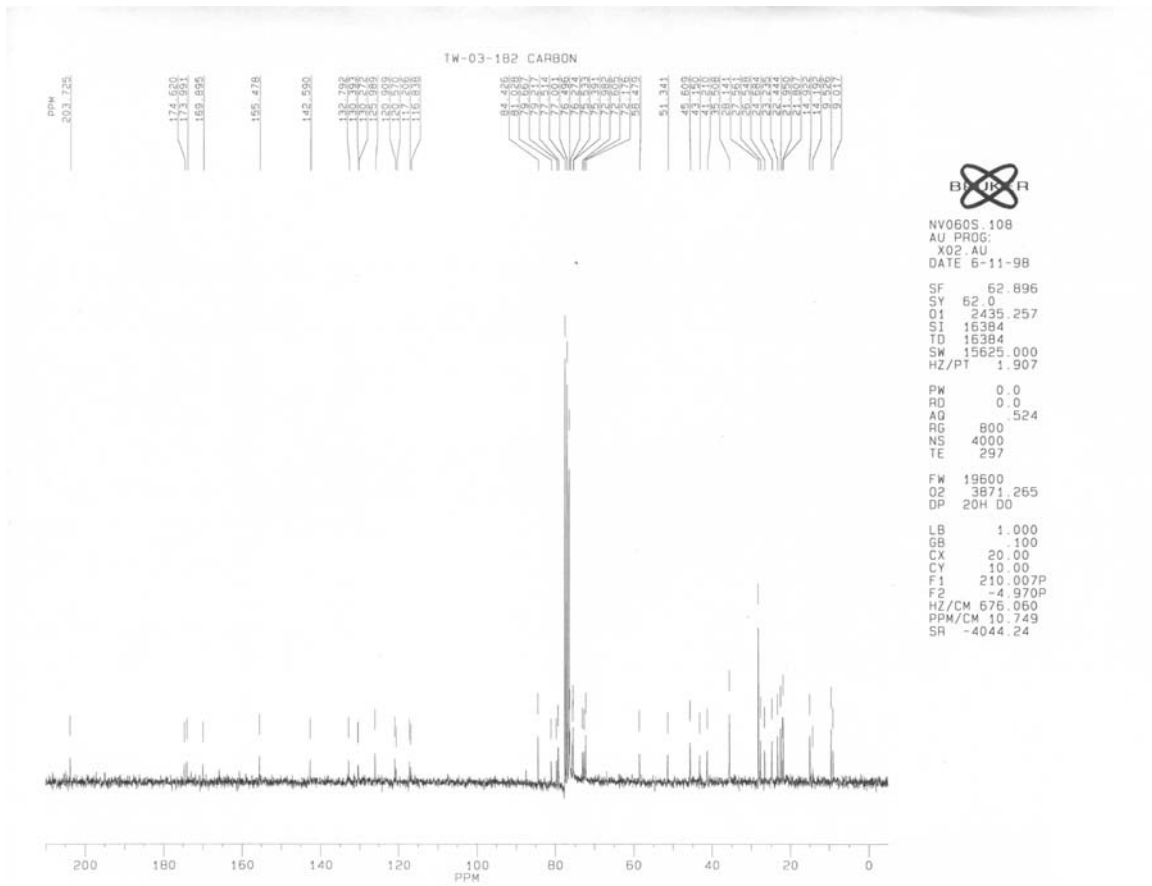

$^{19}\text{F}$  NMR Spectrum of **15c**

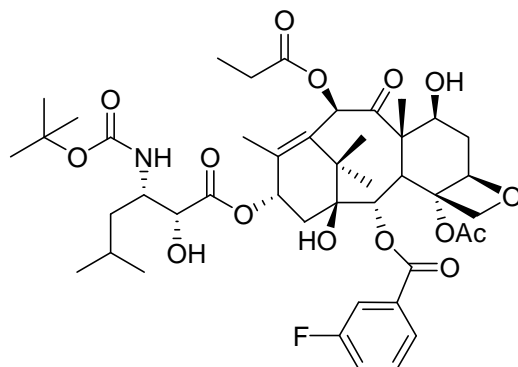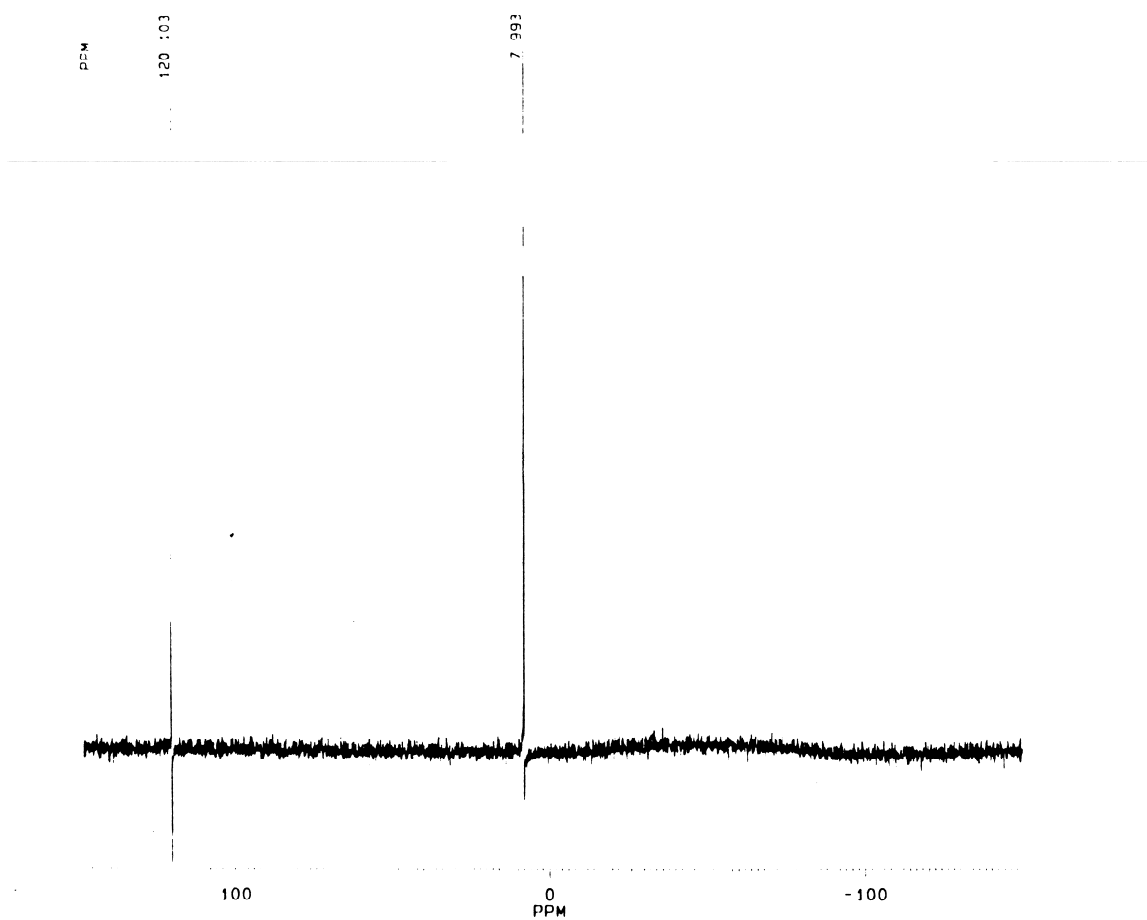

# <sup>1</sup>H NMR Spectrum of 15d

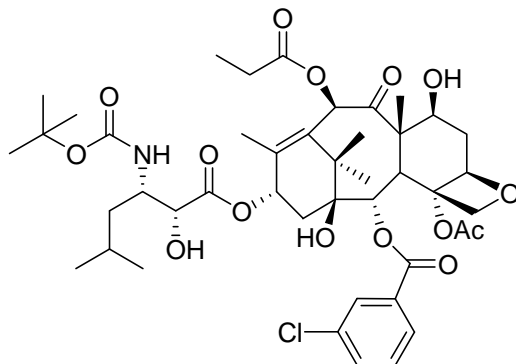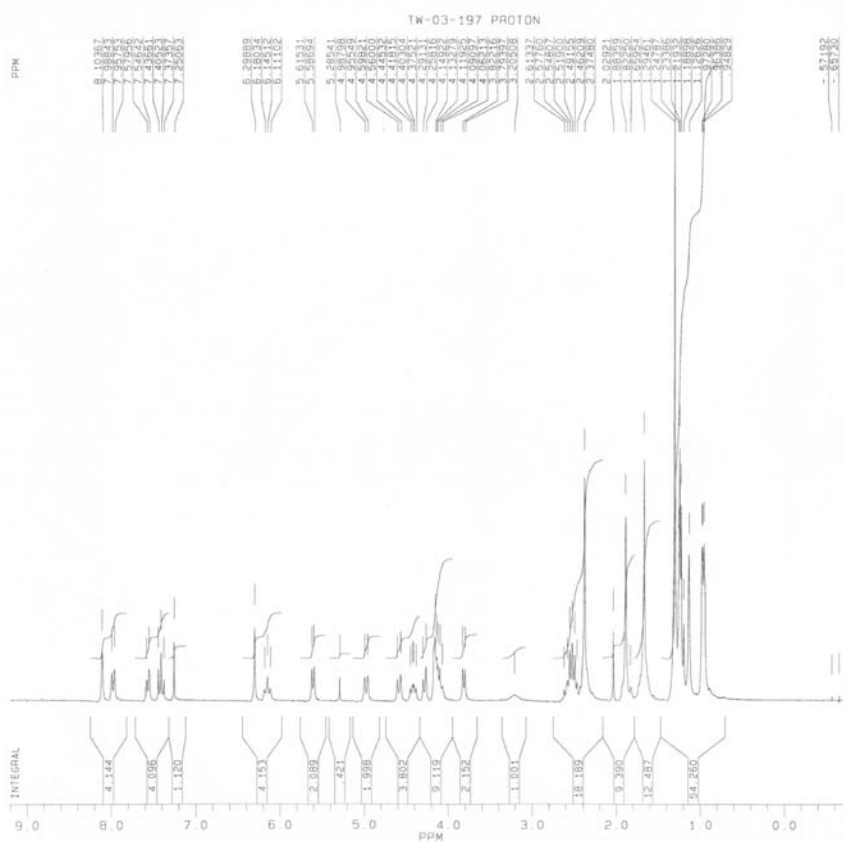

  
 NV270S 104  
 AU PROC:  
 X00 AU  
 DATE 28-11-98  
 SF 250.133  
 SY 100.0  
 O1 4311.814  
 S1 16384  
 TD 16384  
 SW 5000.000  
 HZ/PT 610  
 PW 0.0  
 RD 0.0  
 AQ 1.638  
 RG 80  
 NS 16  
 TE 297  
 FW 6300  
 OP 2714.499  
 DP 63L PD  
 LB .100  
 GB .100  
 CX 20.00  
 CY 15.00  
 F1 9.201P  
 F2 -799P  
 HZ/CM 125.061  
 PPW/CM 500  
 SR 2856.30

# <sup>13</sup>C NMR Spectrum of 15d

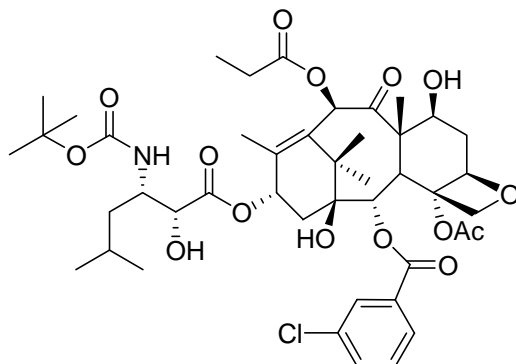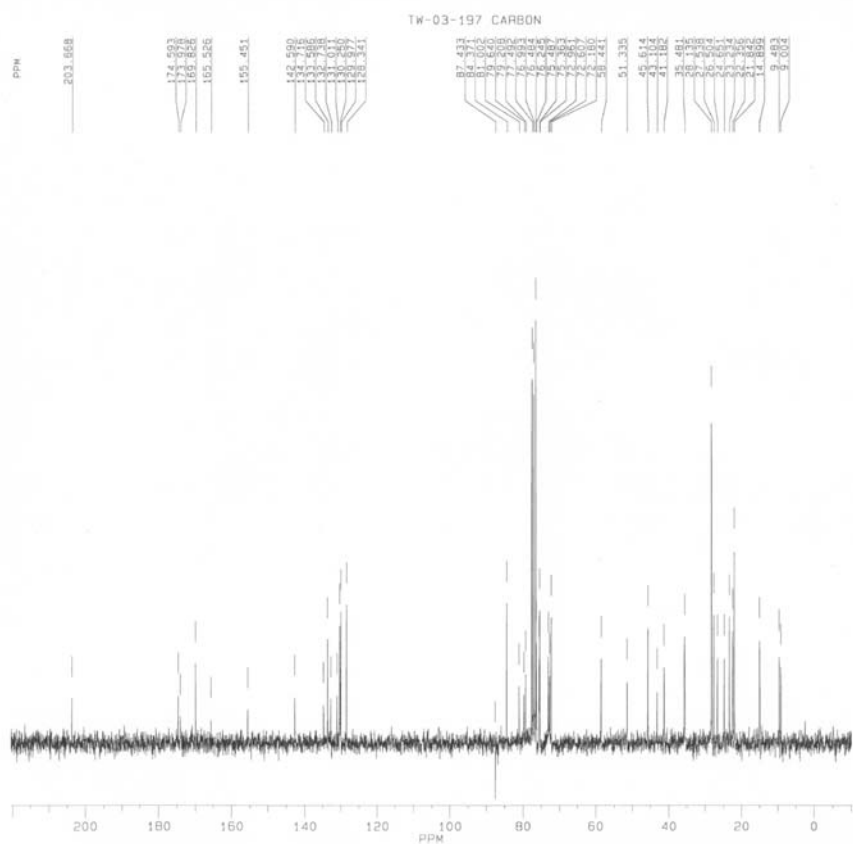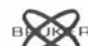

NV2705.105  
 AU PROG:  
 X02 AU  
 DATE 28-11-98

SF 62.896  
 SY 62.0  
 O1 2435.257  
 S1 16384  
 T0 16384  
 SW 15625.000  
 HZ/PT 1.907

PW 0.0  
 RD 0.0  
 AQ -524  
 RG 800  
 NS 2000  
 TE 297

FW 19600  
 O2 3871.265  
 DP 20H 00

LB 1.000  
 GB .100  
 CX 20.00  
 CY 10.00  
 F1 220.409P  
 F2 -10.277P  
 HZ/CM 725.460  
 PPM/CM 11.534  
 SR -4042.33

# <sup>1</sup>H NMR Spectrum of 15g

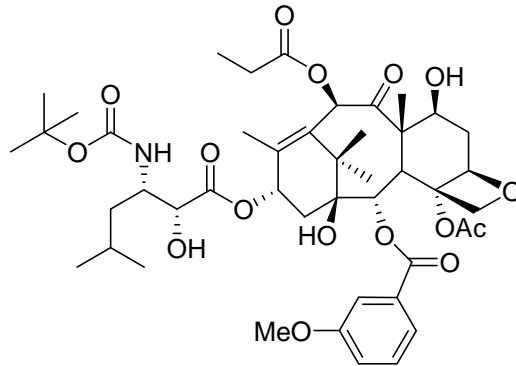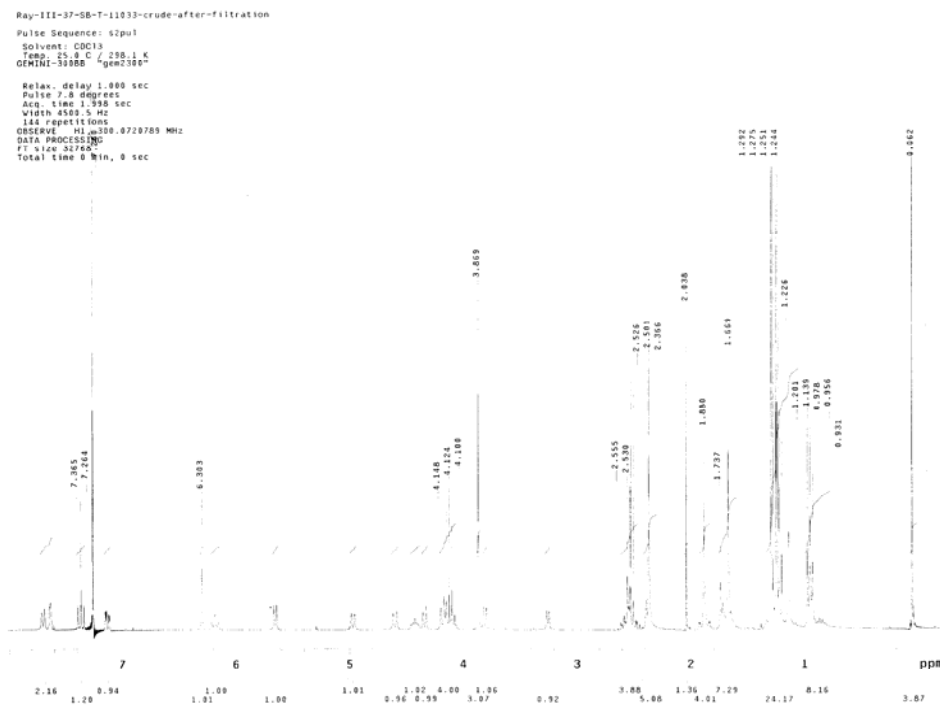



# $^1\text{H}$ NMR Spectrum of 17a

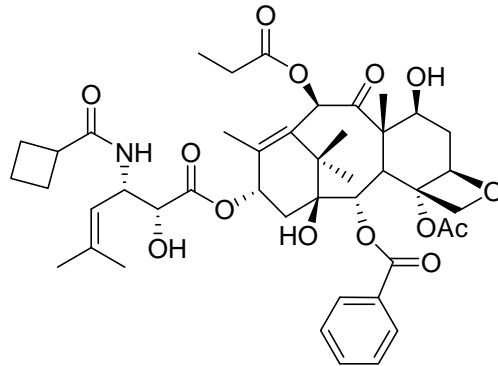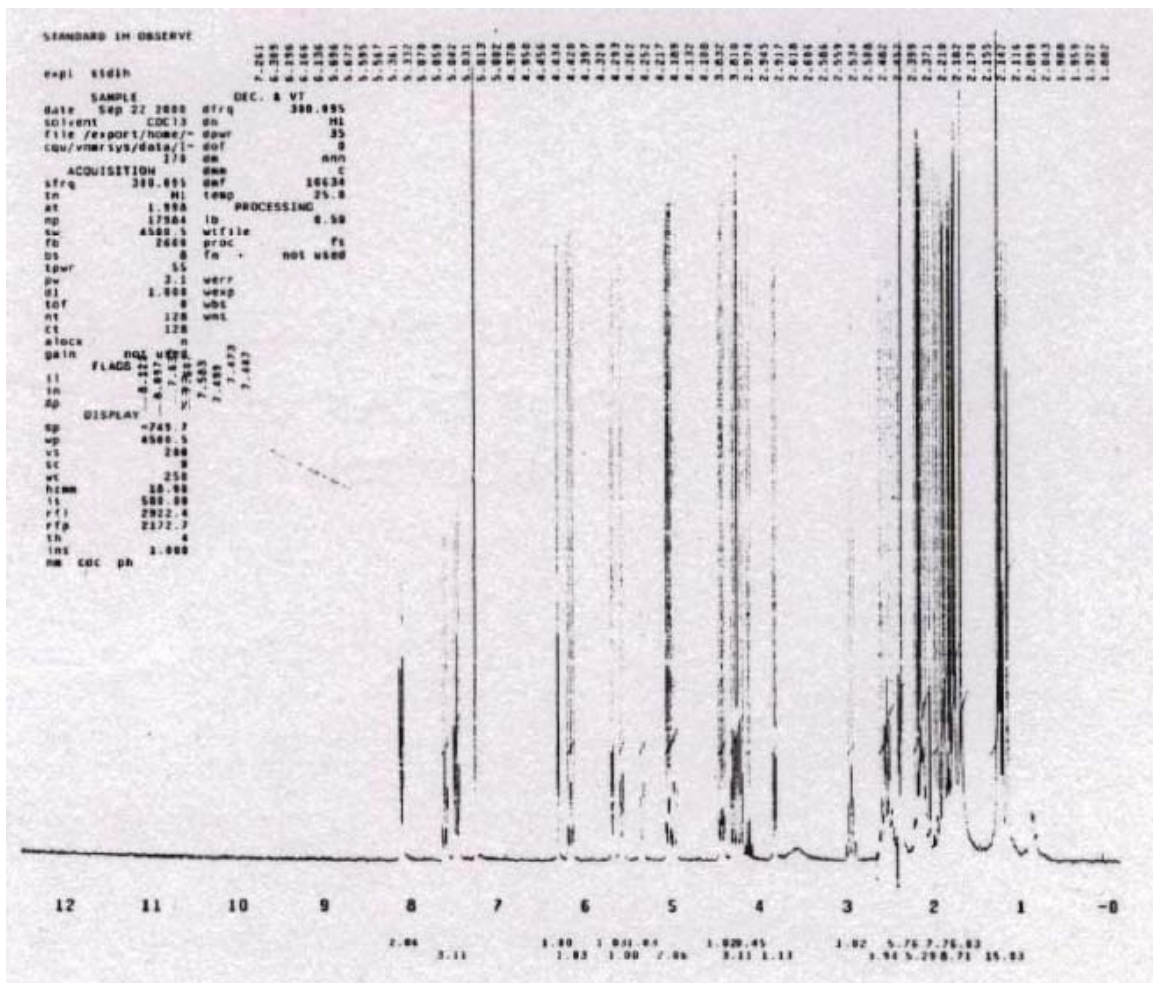

# $^{13}\text{C}$ NMR Spectrum of 17a

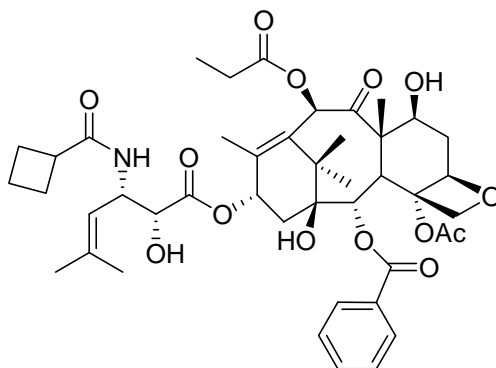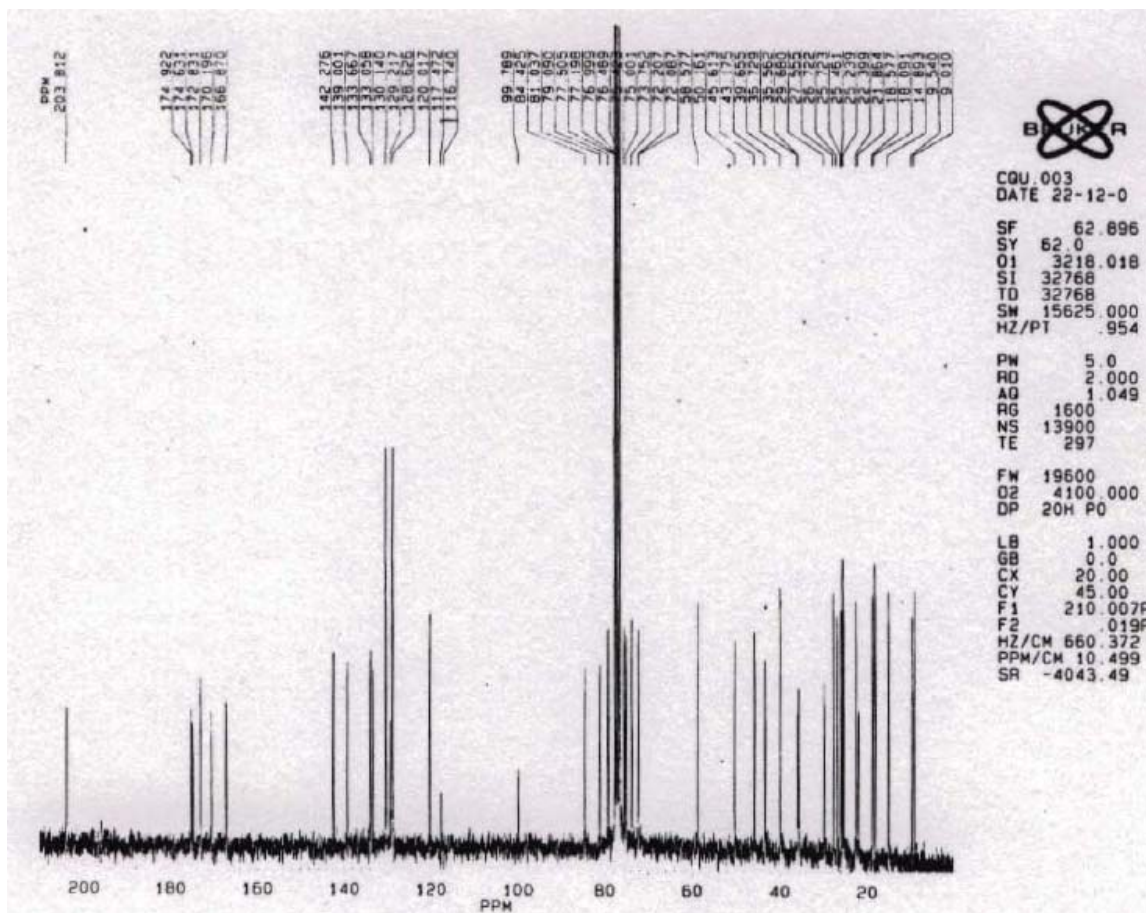



$^{13}\text{C}$  NMR Spectrum of 17b

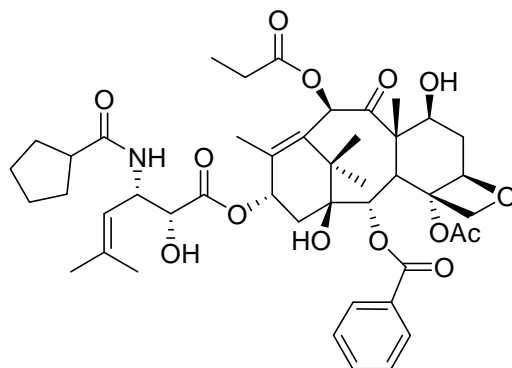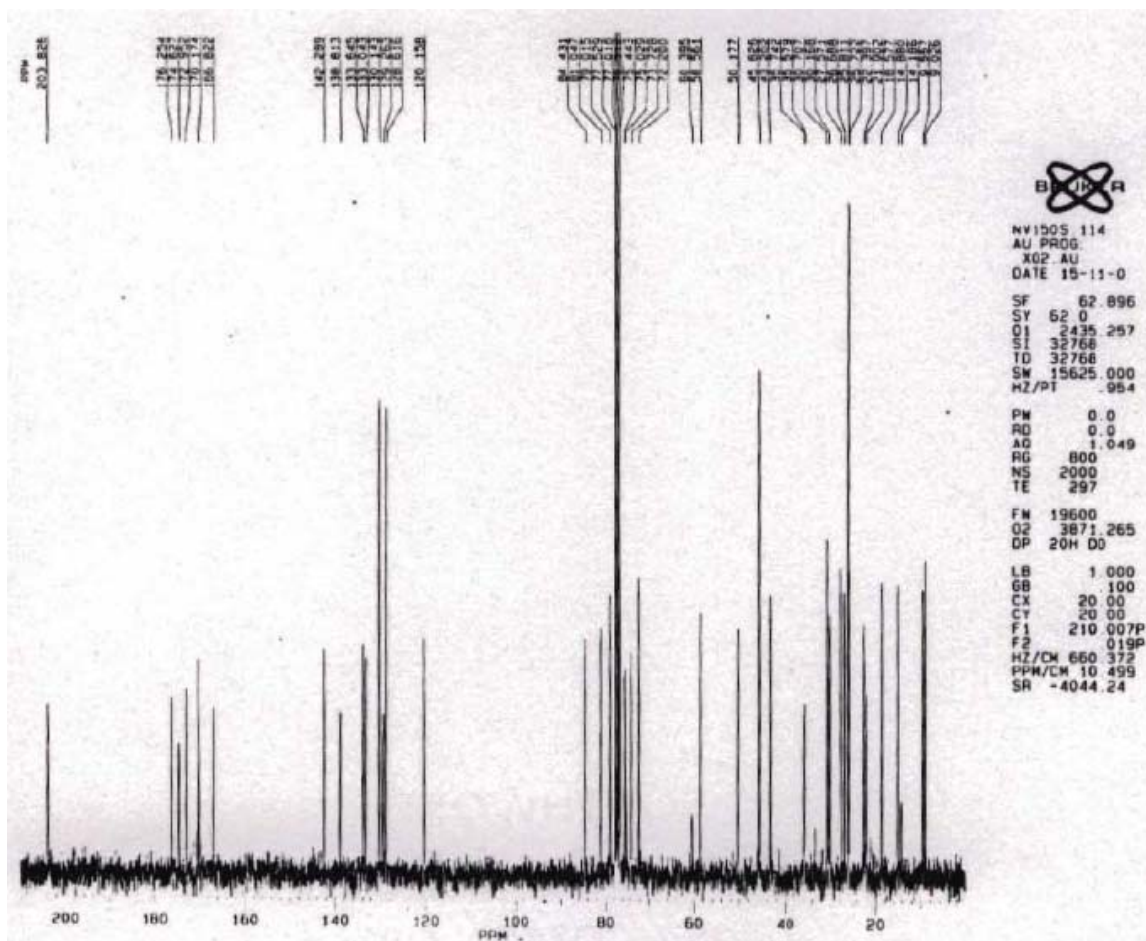

$^1\text{H}$  NMR Spectrum of 17c

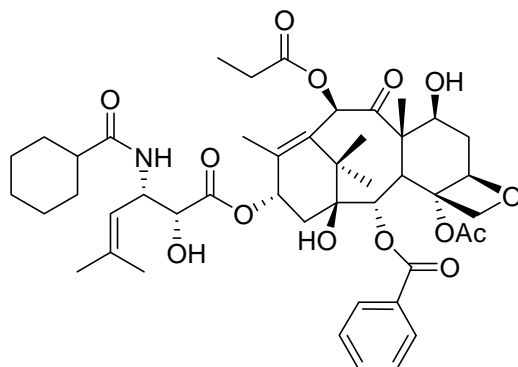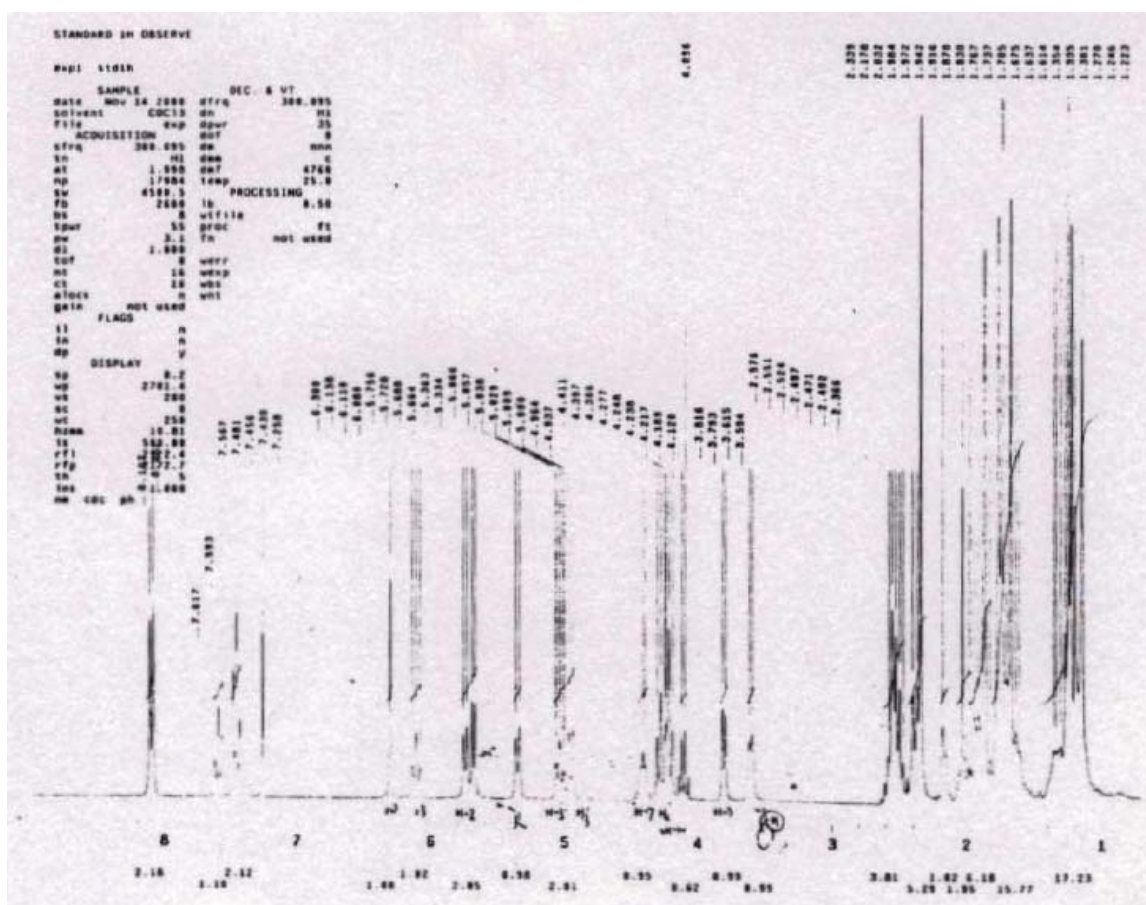

# $^{13}\text{C}$ NMR Spectrum of 17c

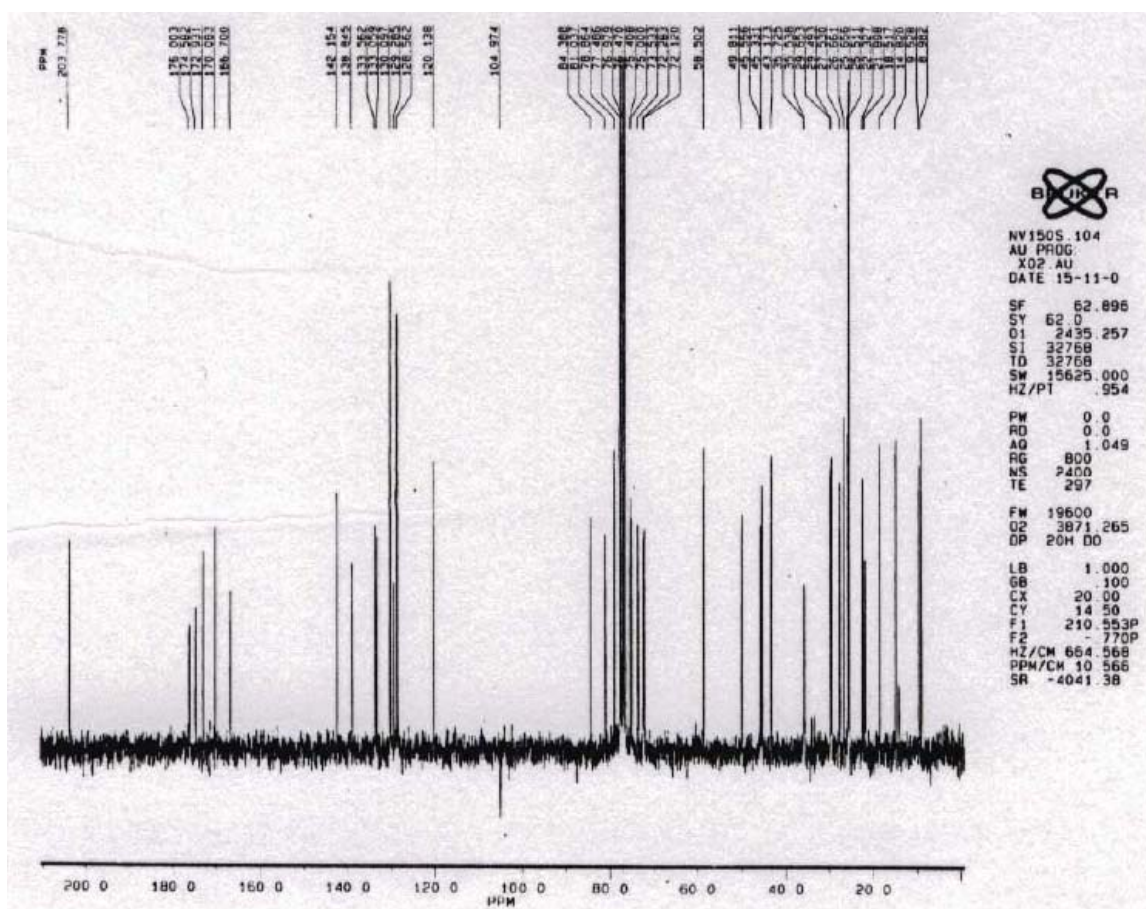

<sup>1</sup>H NMR Spectrum of 17d

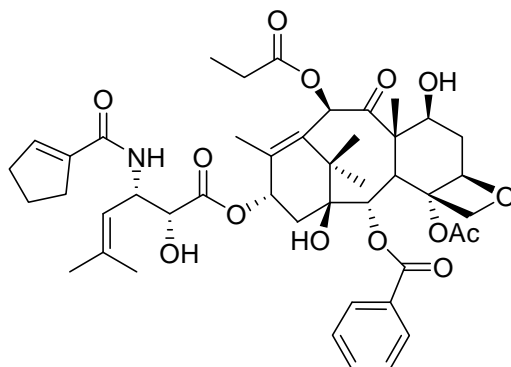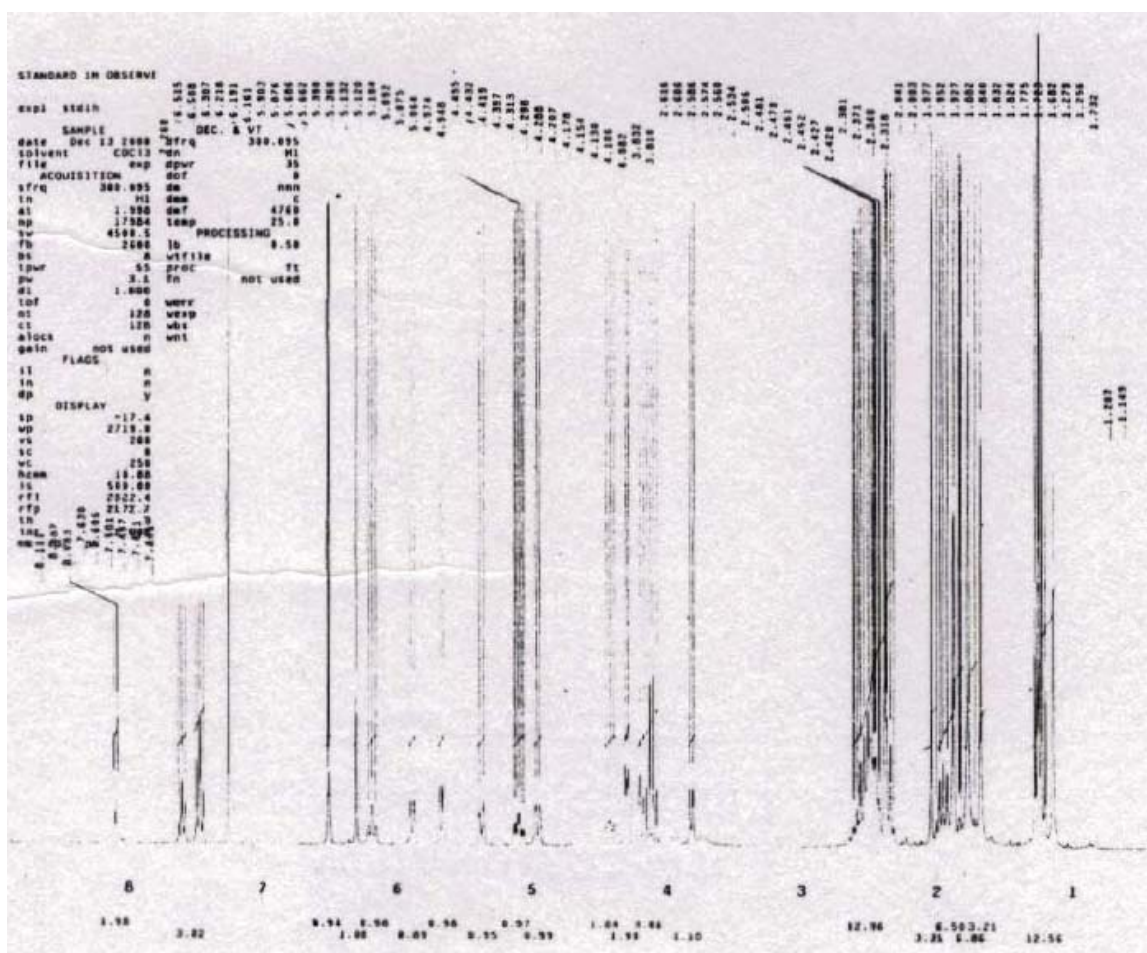

# $^{13}\text{C}$ NMR Spectrum of 17d

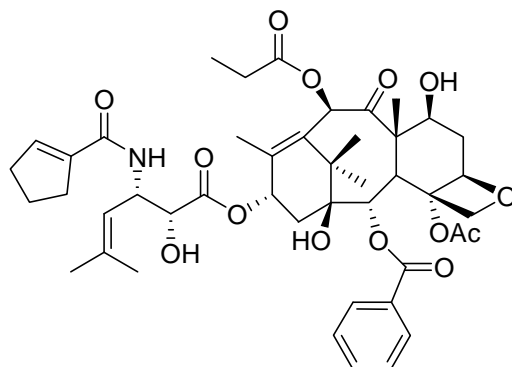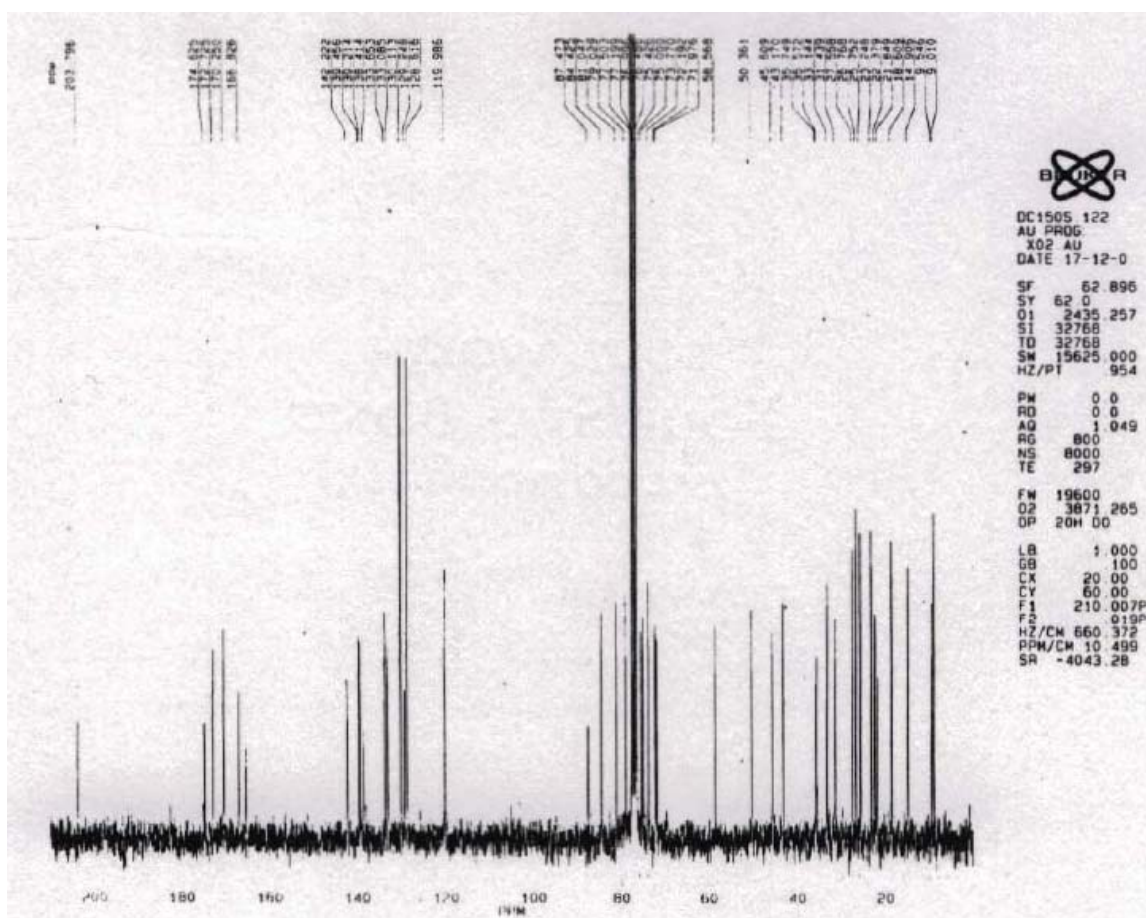



<sup>1</sup>H NMR Spectrum of **17e**

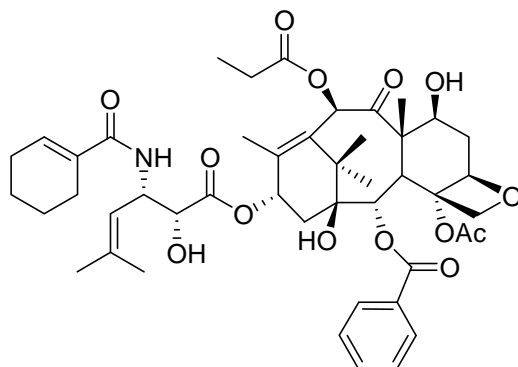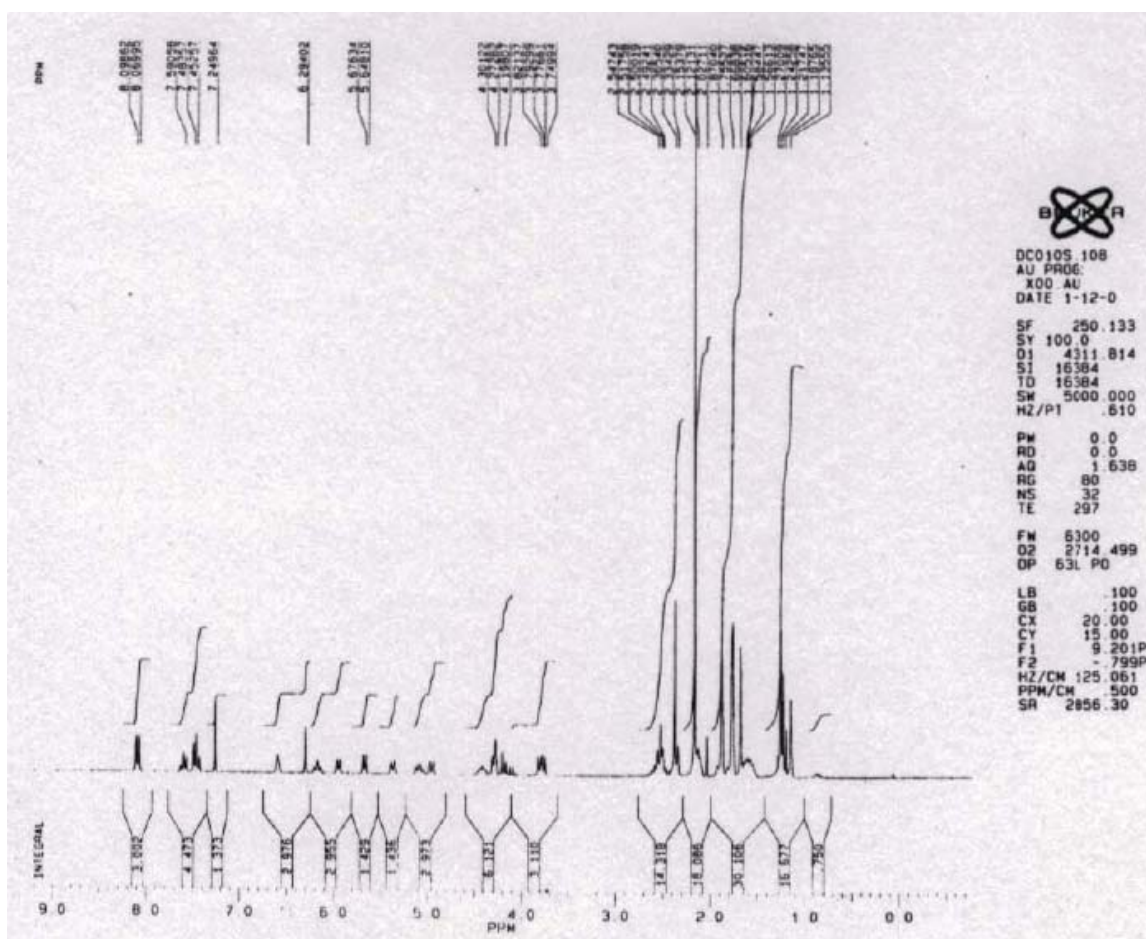

# $^{13}\text{C}$ NMR Spectrum of 17e

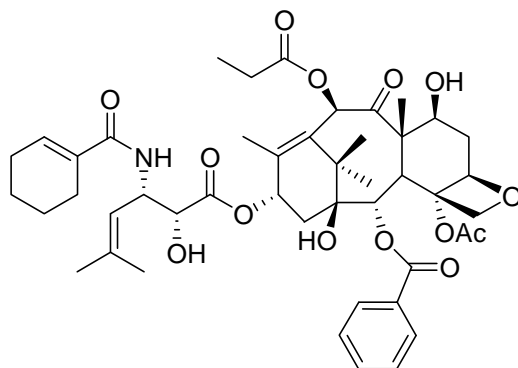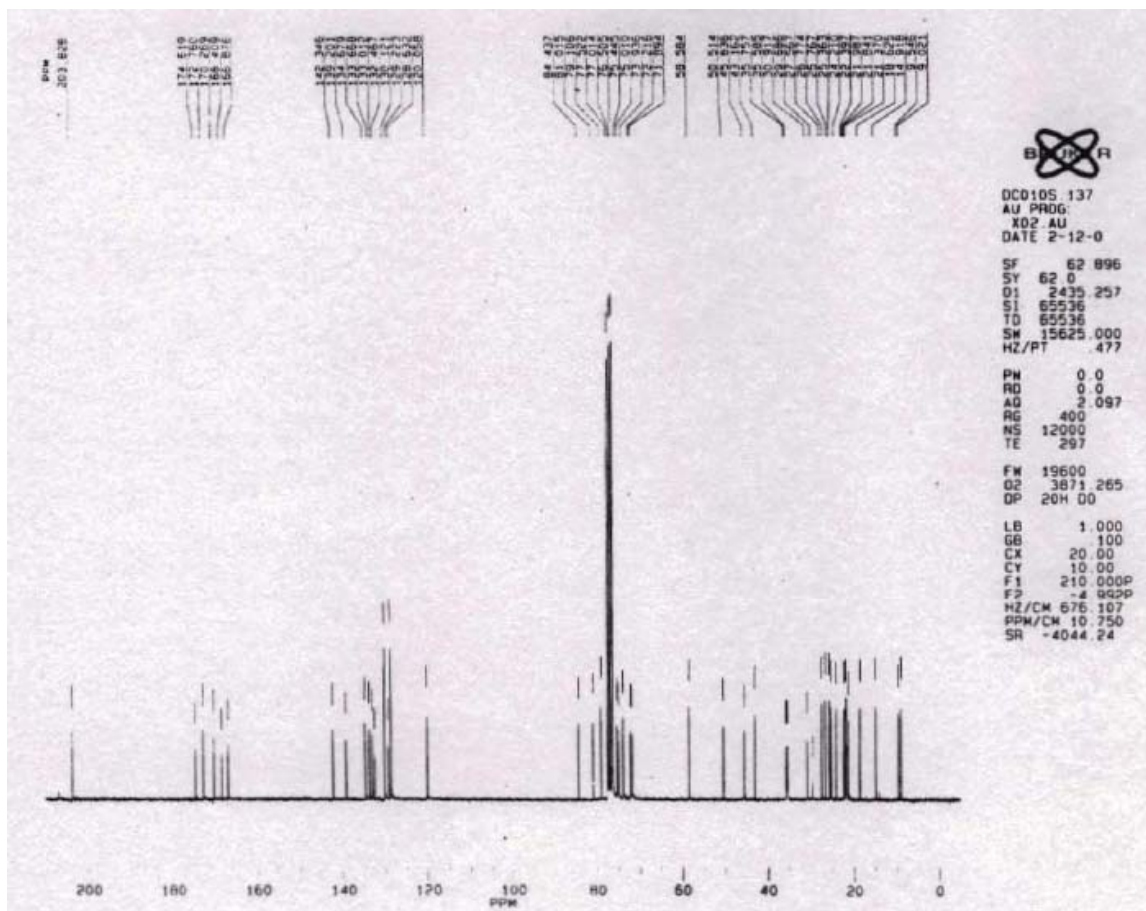









<sup>1</sup>H NMR Spectrum of **18b**

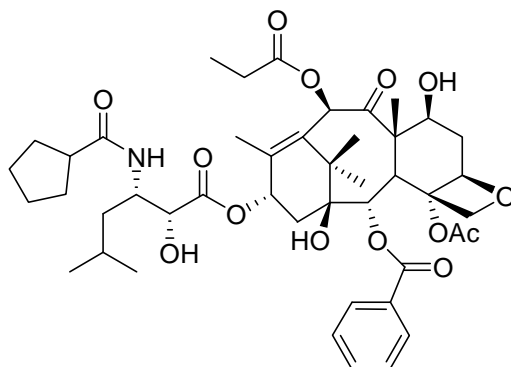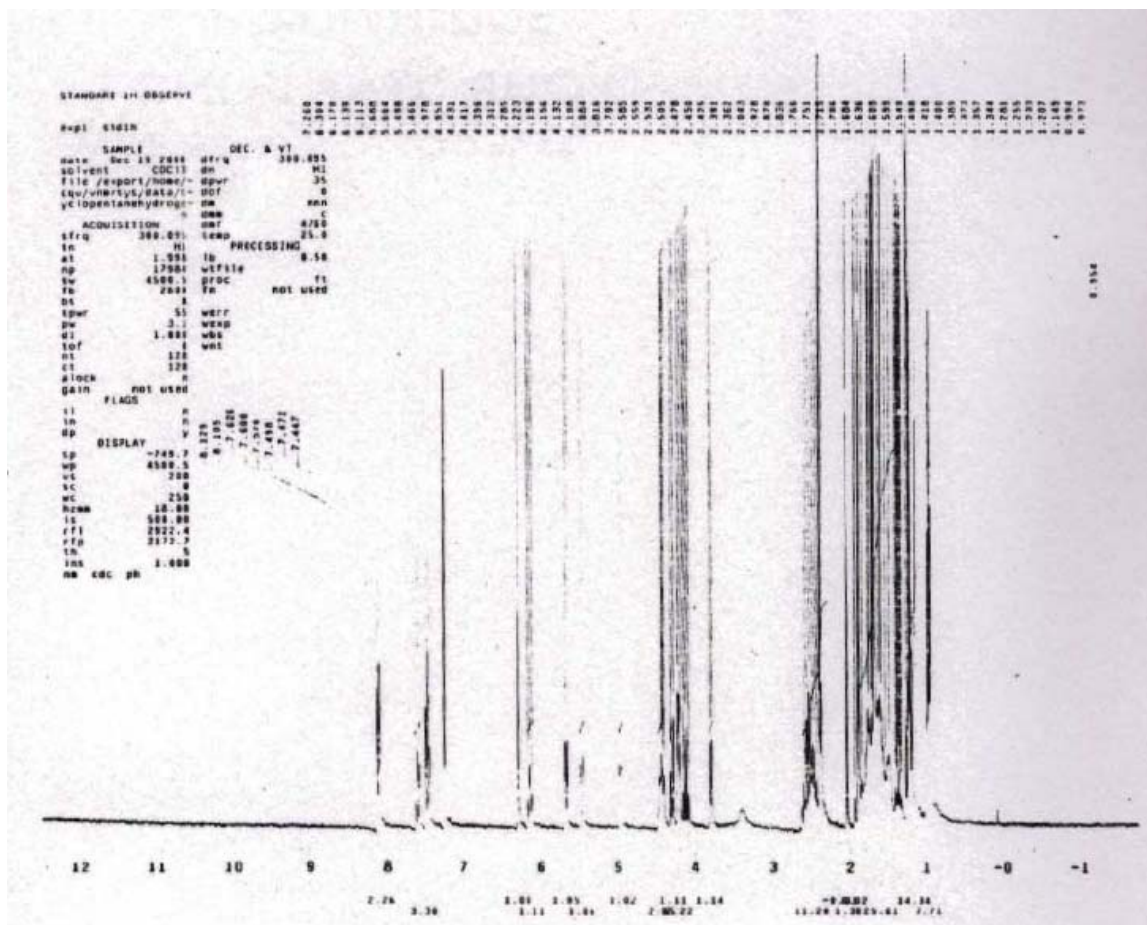

# $^{13}\text{C}$ NMR Spectrum of **18b**

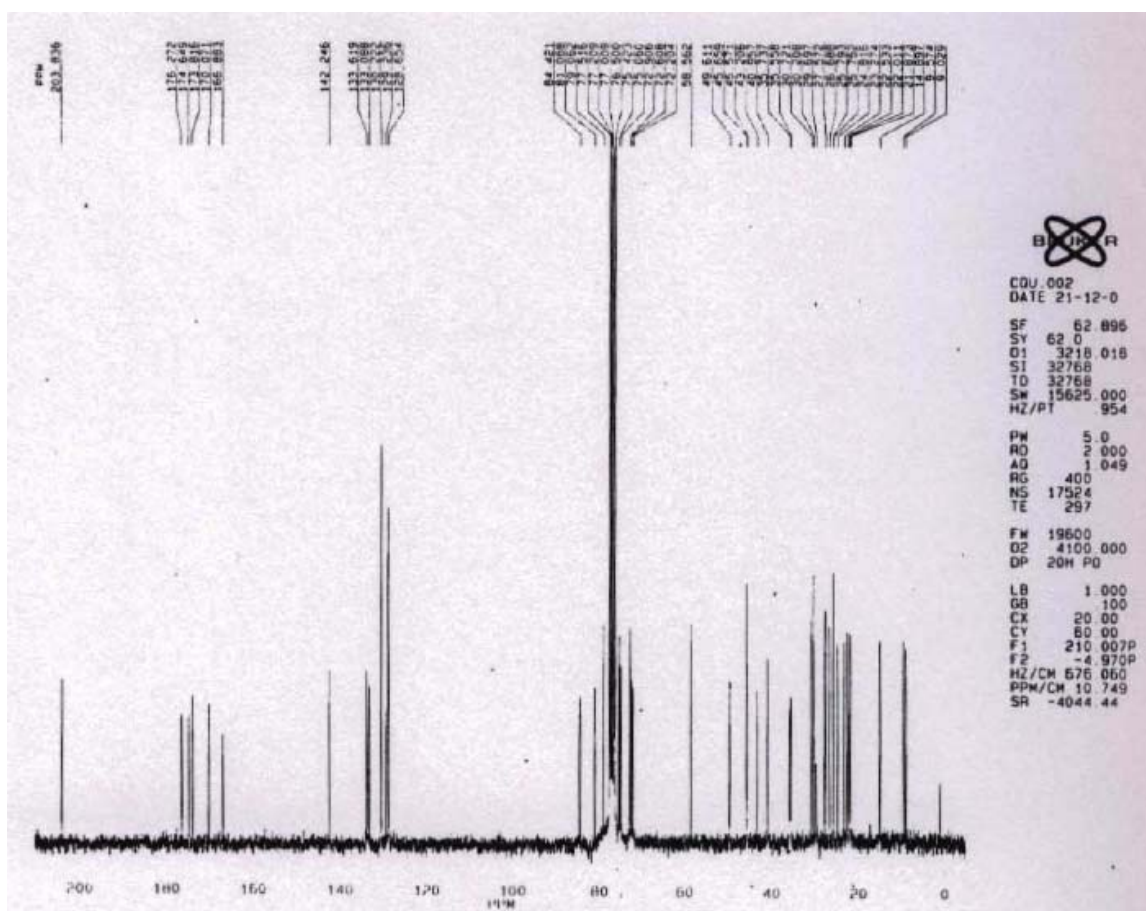



# $^{13}\text{C}$ NMR Spectrum of 18c

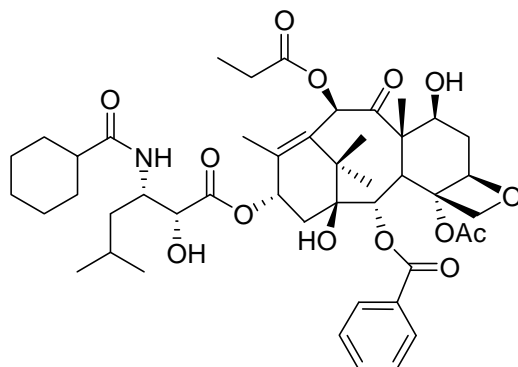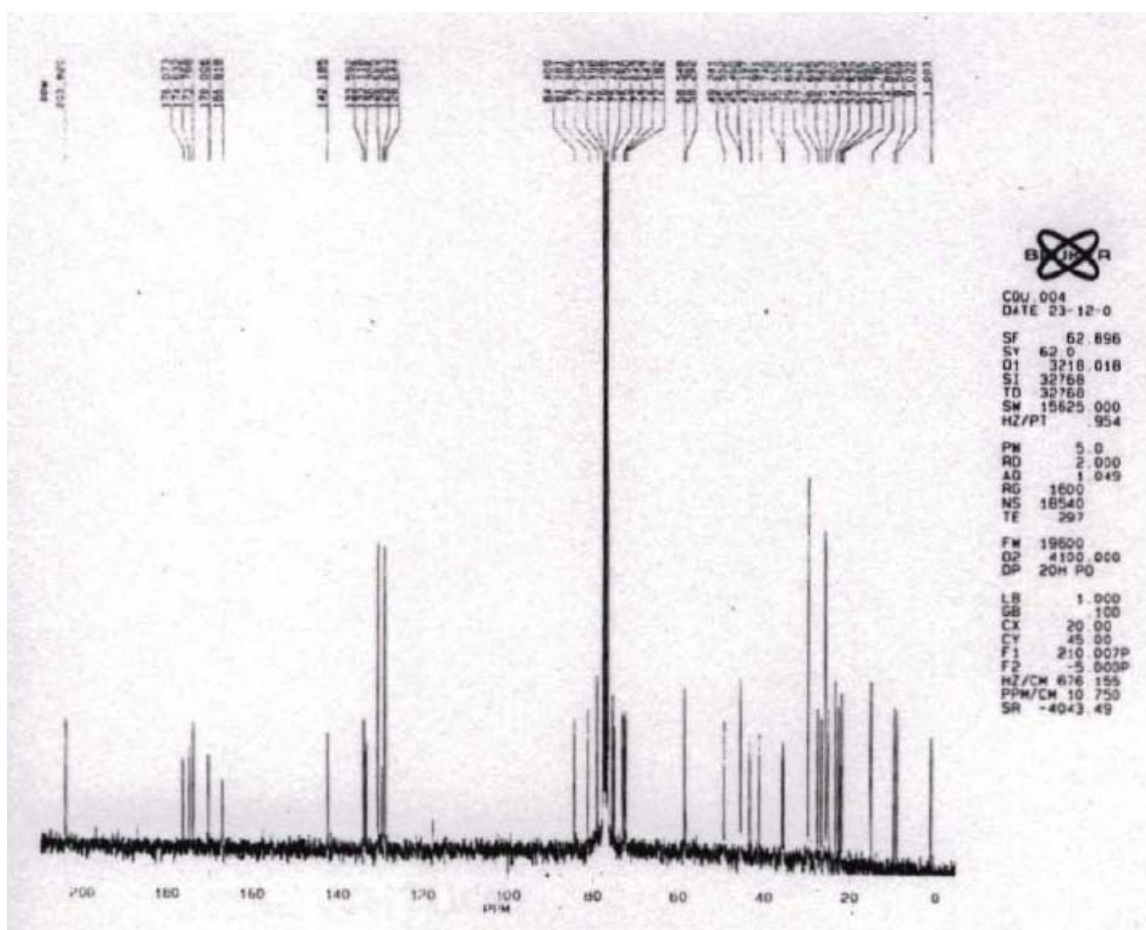

<sup>1</sup>H NMR Spectrum of **18f**

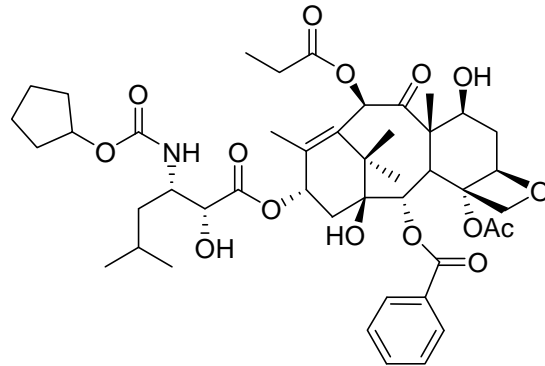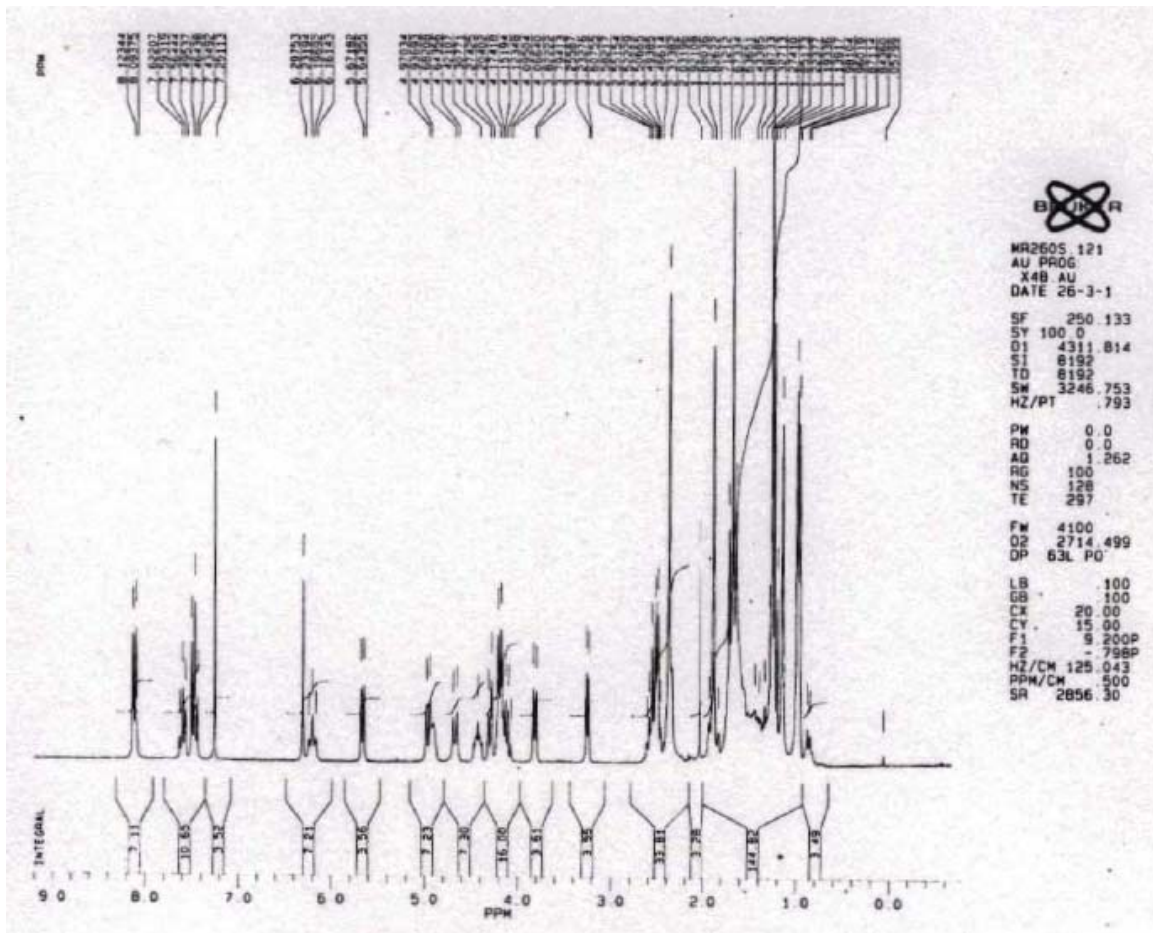

# $^{13}\text{C}$ NMR Spectrum of **18f**

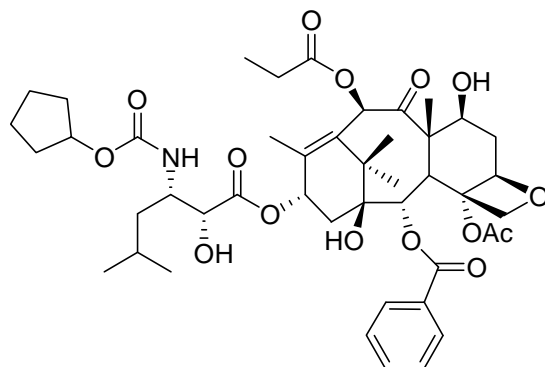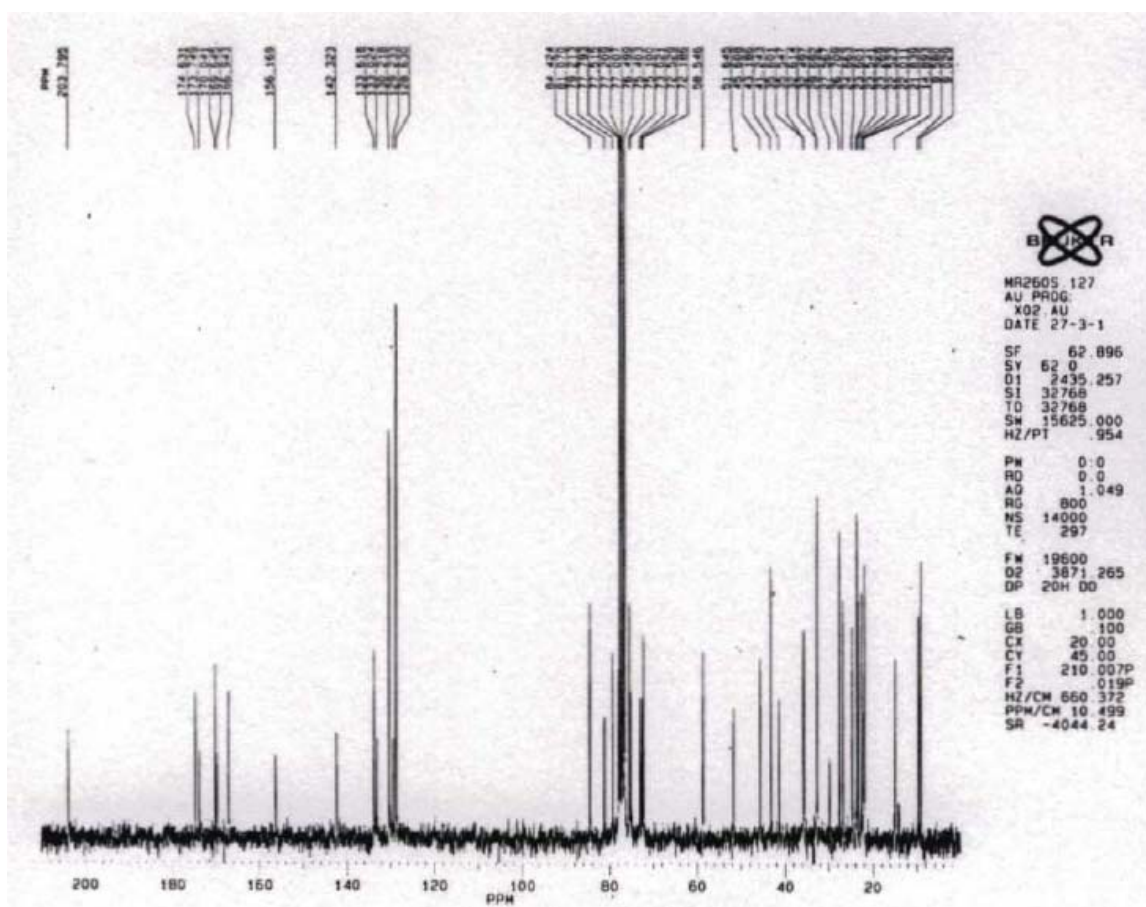

<sup>1</sup>H NMR Spectrum of **18g**

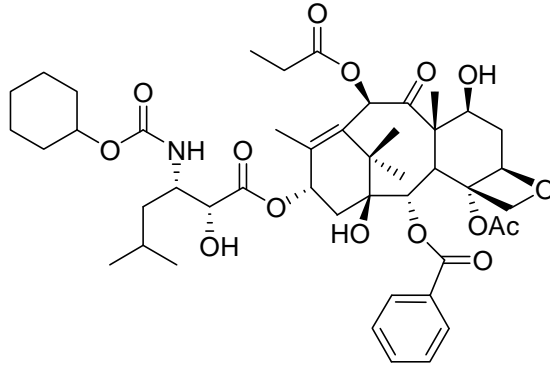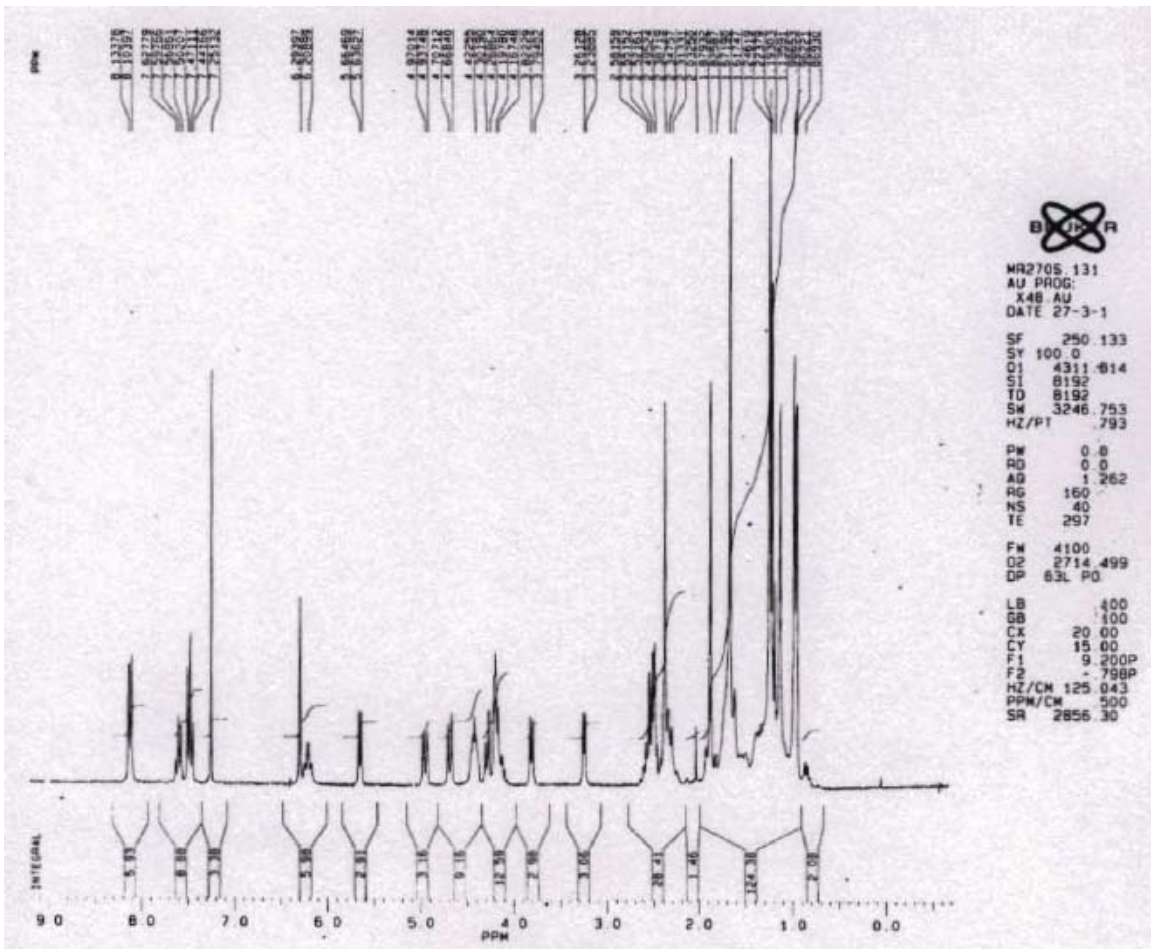

# $^{13}\text{C}$ NMR Spectrum of 18g

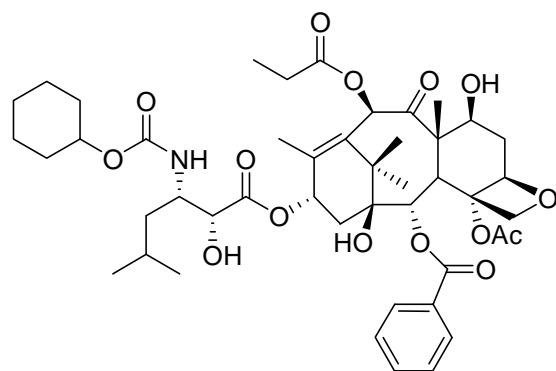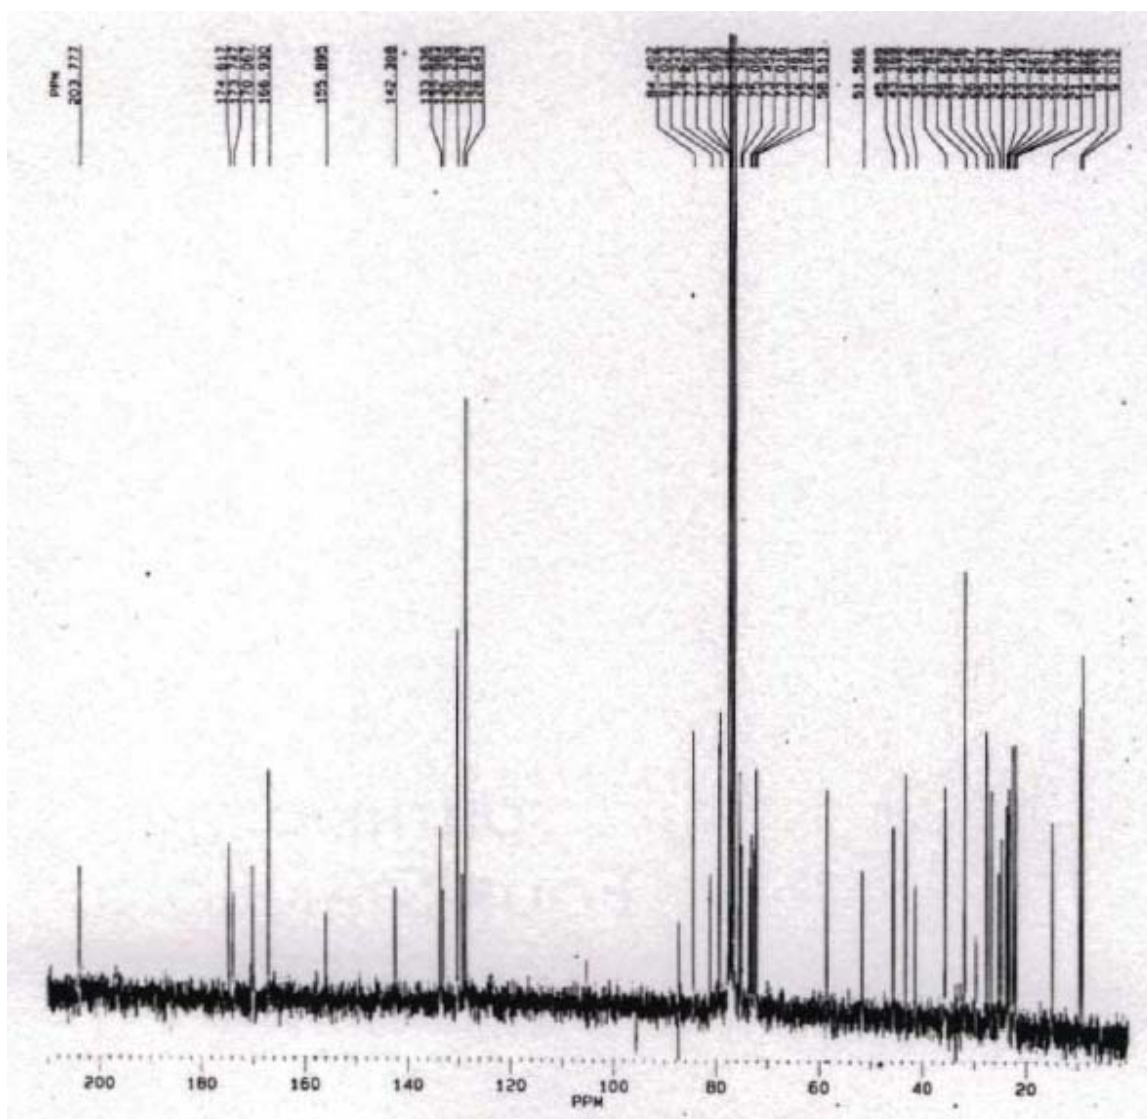

<sup>1</sup>H NMR Spectrum of **18h**

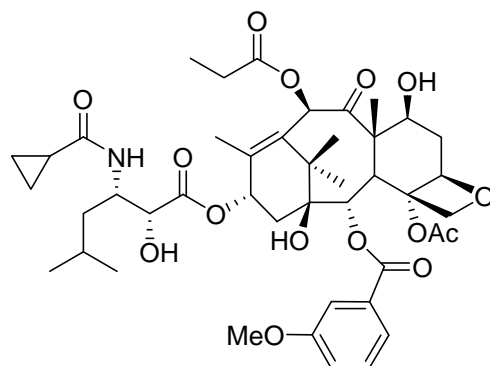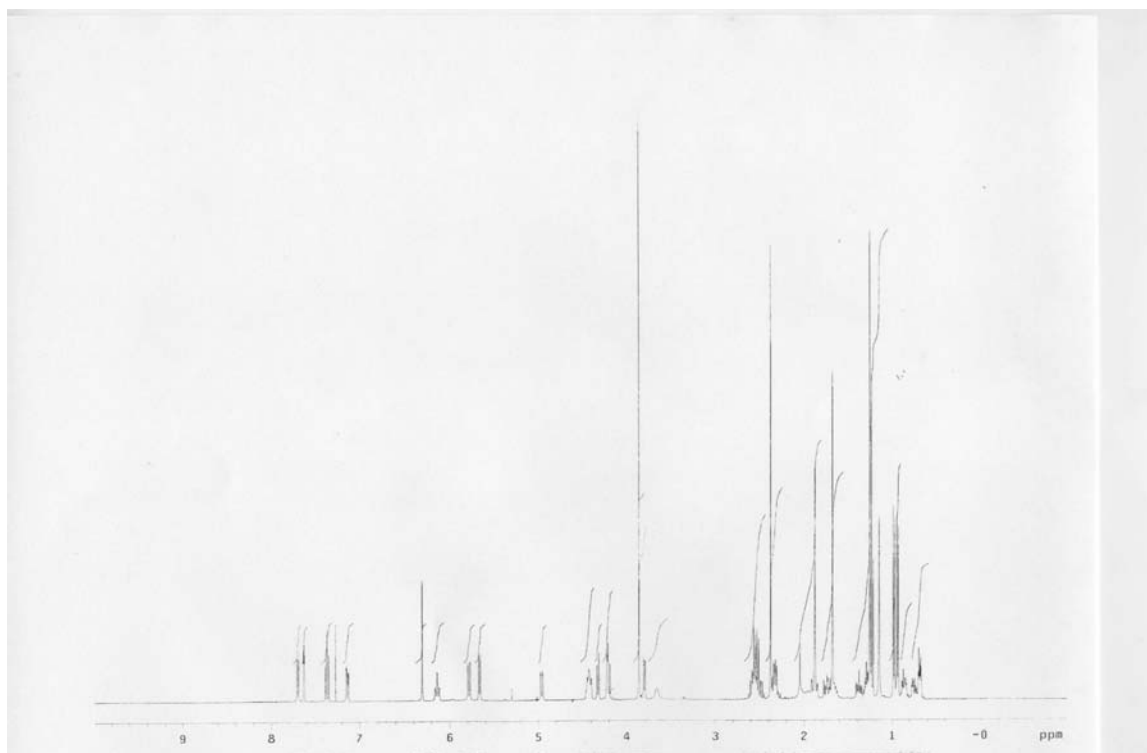

$^{13}\text{C}$  NMR Spectrum of **18h**

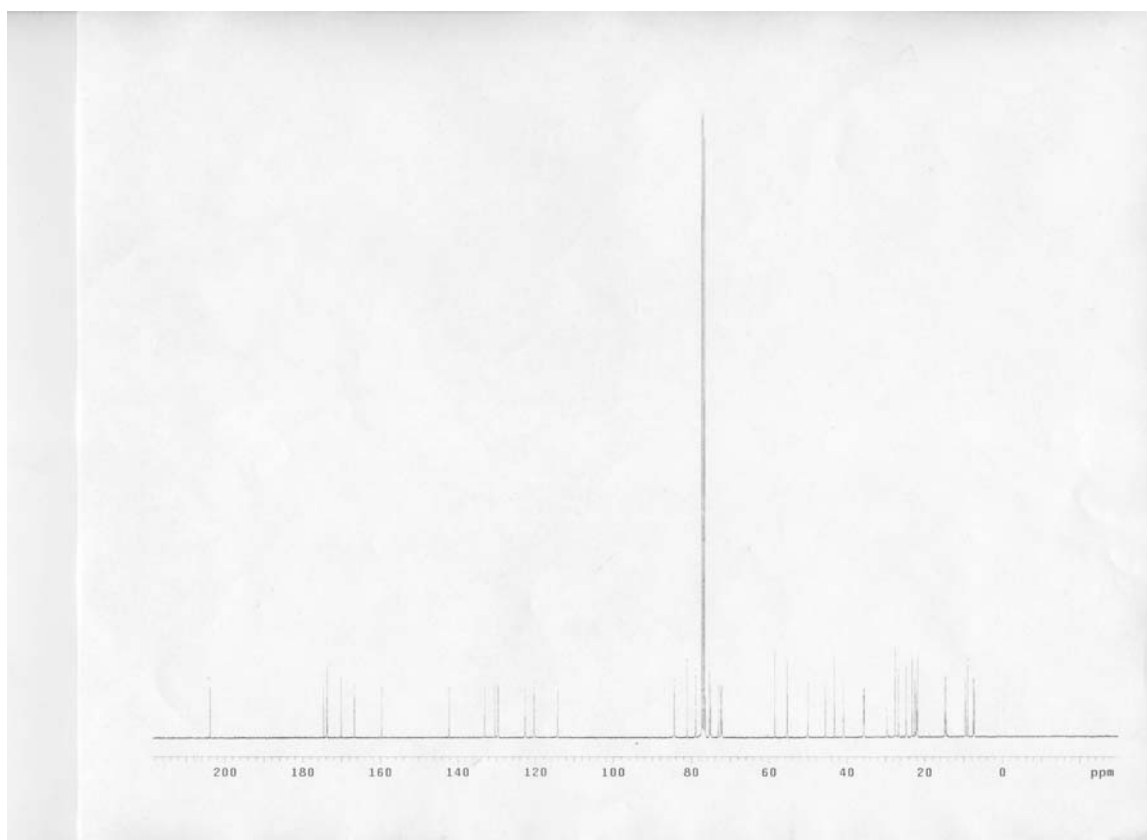

<sup>1</sup>H NMR Spectrum of **18k**

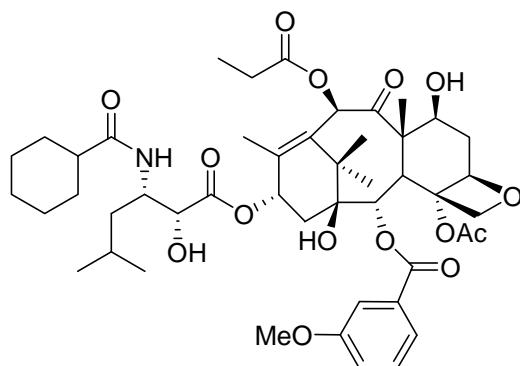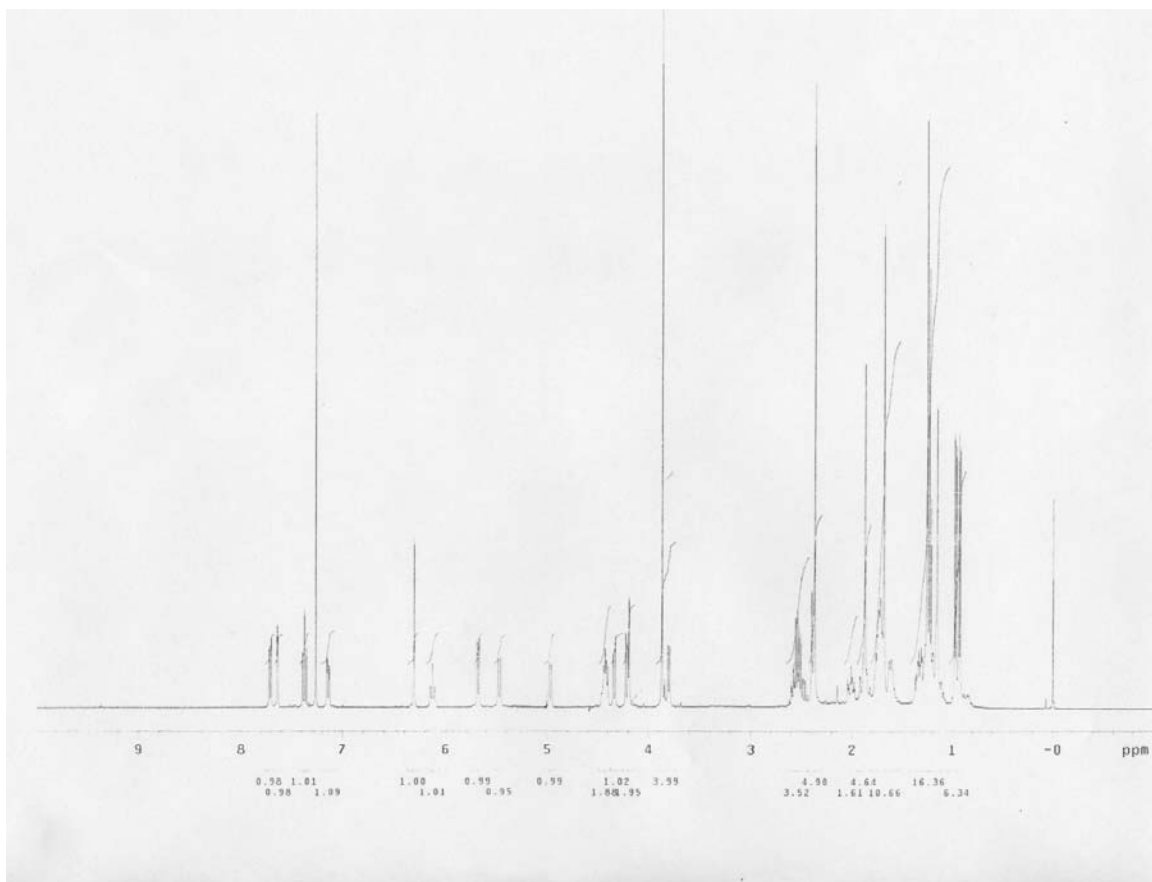



$^{13}\text{C}$  NMR Spectrum of **18k**

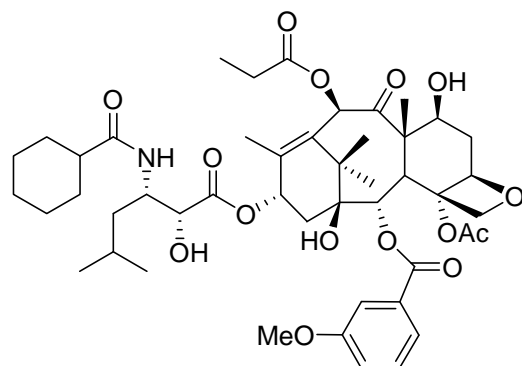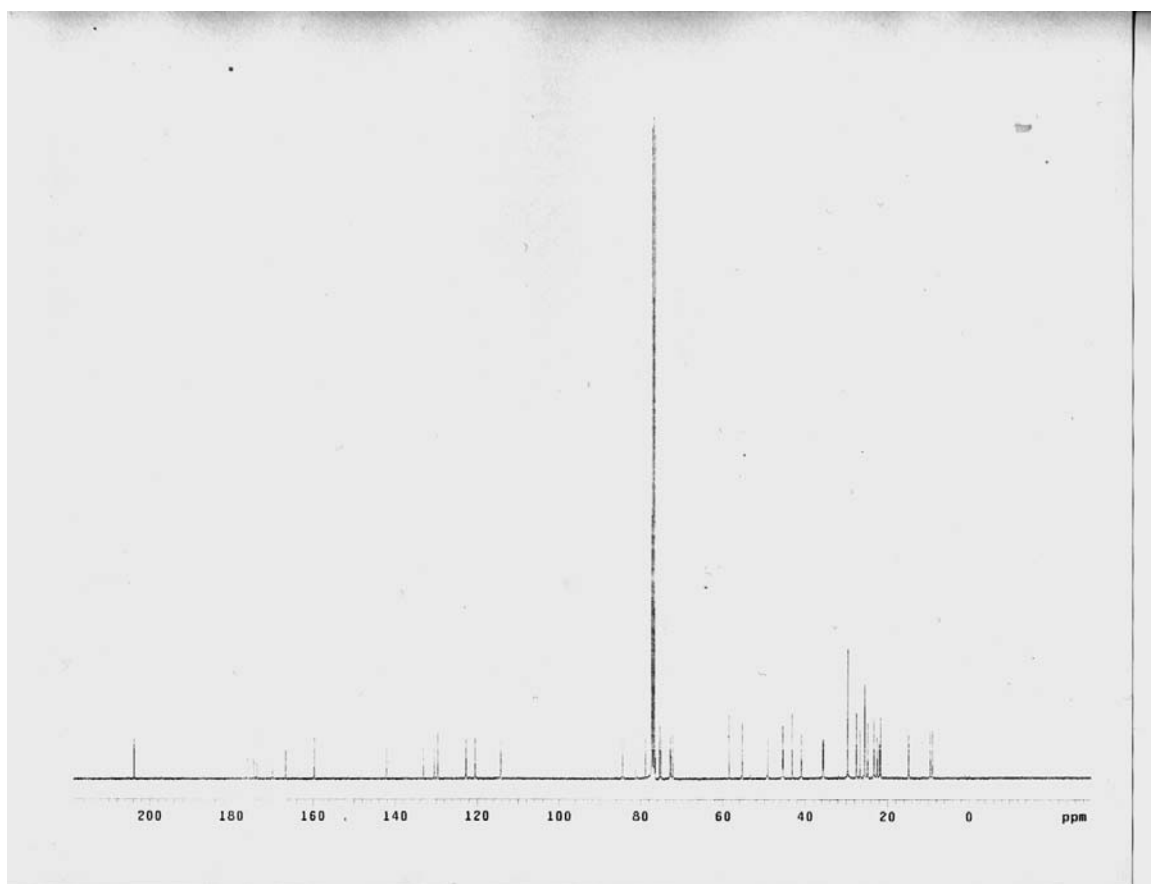

$^1\text{H}$  NMR Spectrum of **18m**

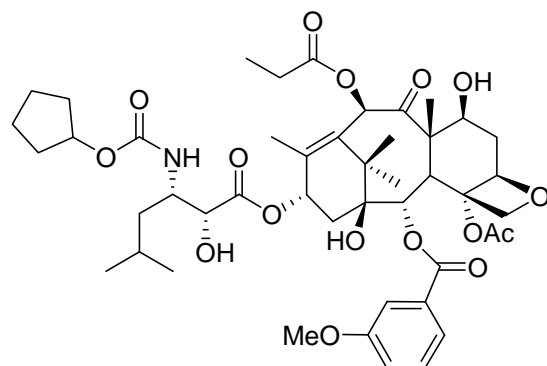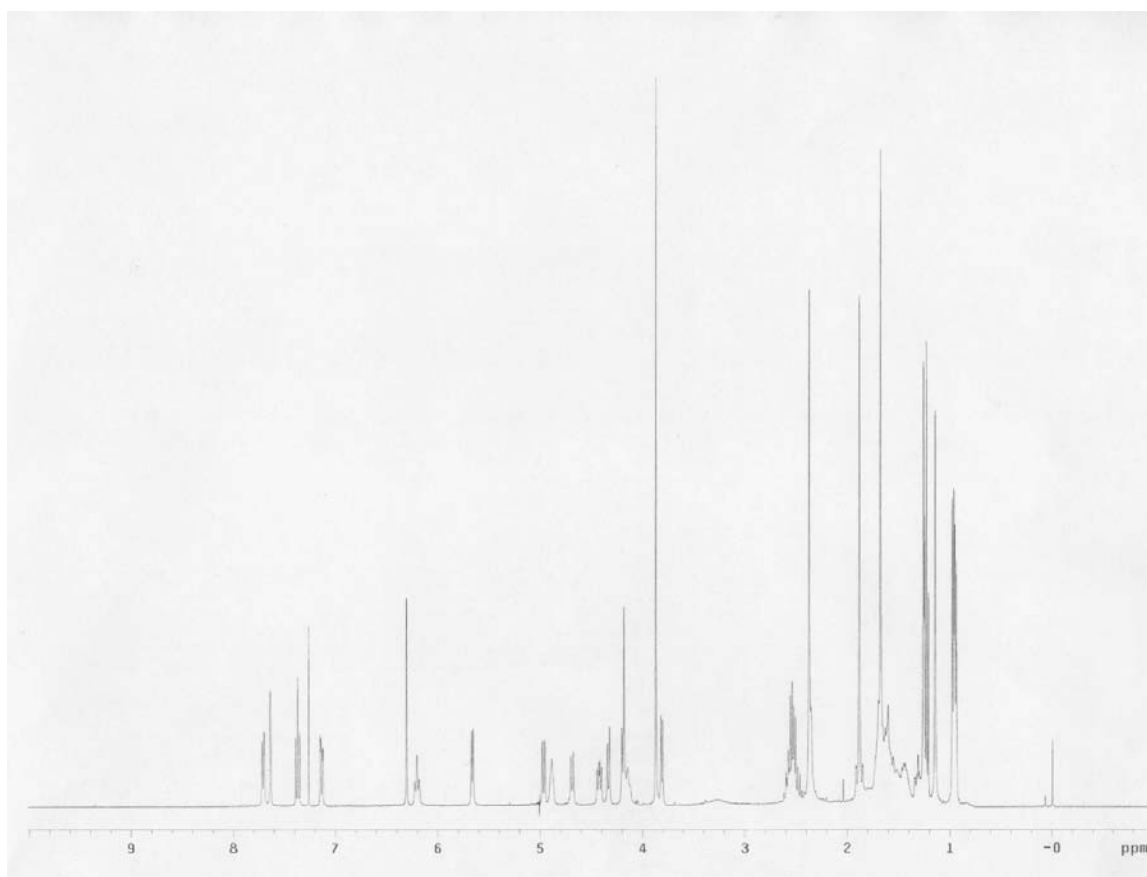

$^{13}\text{C}$  NMR Spectrum of **18m**

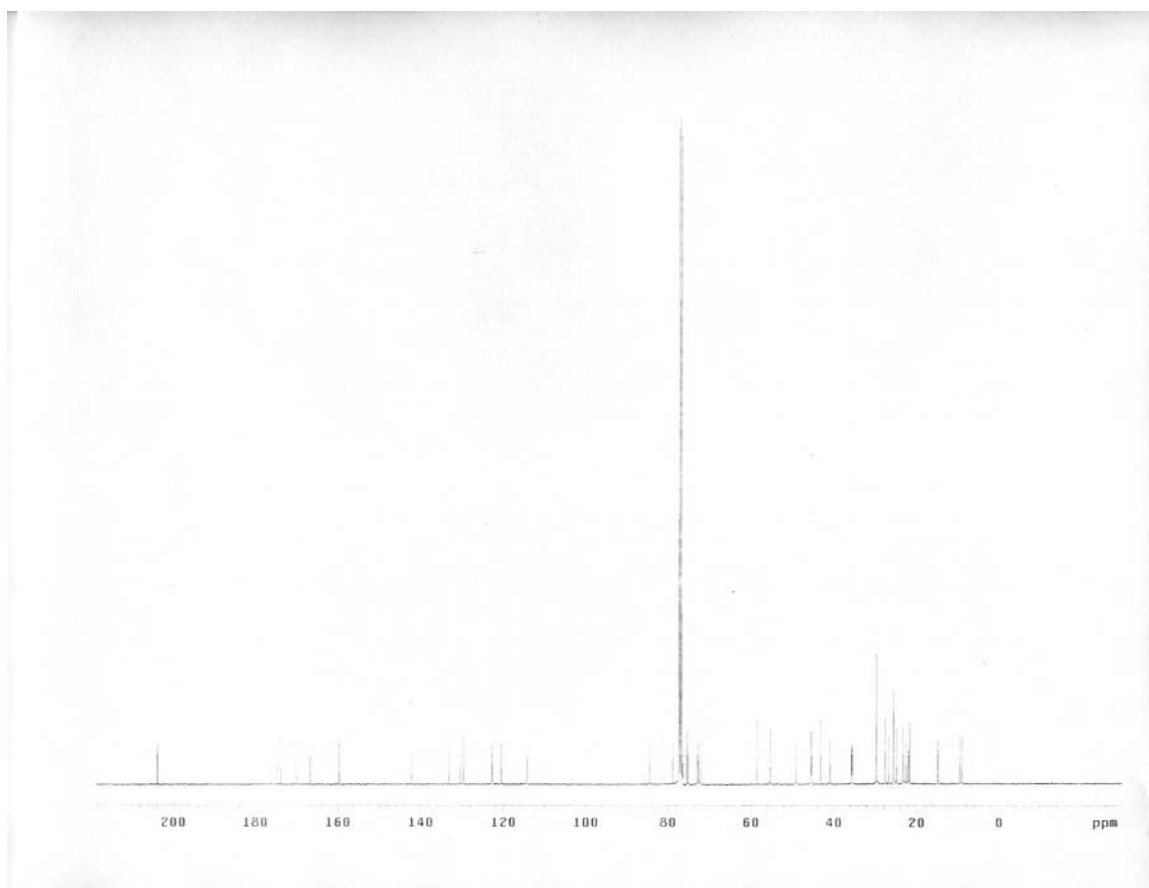

Supplement: NIHMS102336-supplement-Supporting_Information.pdf [file NIHMS102336-supplement-Supporting_Information.pdf]
